# Supplementary material for: Novel 9-Methylanthracene Derivatives as p53 Activators for the Treatment of Glioblastoma Multiforme
Source: MDPI journal article supplement (doi:10.3390/molecules29102396), 2024-05-19

# **Novel 9-Methylanthracene Derivatives as p53 Activators for the Treatment of Glioblastoma multiforme**

Yuxin Feng<sup>1</sup>, Yingjie Wang<sup>1</sup>, Xiaoxue Li<sup>2</sup>, Ziqiang Sun<sup>2</sup>, Sihan Qiang<sup>2</sup>, Hongbo Wang<sup>1\*</sup>, Yi Liu<sup>2\*</sup>

<sup>1</sup> Key Laboratory of Molecular Pharmacology and Drug Evaluation (Yantai University),  
Ministry of Education, Yantai University, Yantai 264005, China

<sup>2</sup> School of Chemistry and Chemical Engineering, Yantai University, Yantai 264005, China;

\* Correspondence: liuyi@ytu.edu.cn(Y.L.); hongbowangyt@163.com (H.W)

## **Contents**

|                                                                                                         |            |
|---------------------------------------------------------------------------------------------------------|------------|
| <b>1. Characterization of compound (XI-011, 12a-12l, 13a-13l, and 14a-14s)</b>                          | <b>S3</b>  |
| <b>2. NMR spectra of synthesized compounds</b>                                                          | <b>S11</b> |
| <b>3. HPLC spectra of 13e</b>                                                                           | <b>S57</b> |
| <b>4. Dose–response curves of compounds on the cytotoxicity of U87-MG, Hela, MCF-7, and HHL-5 cells</b> | <b>S58</b> |
| <b>5. Origin western blots results in U87 cells treatment with 13e</b>                                  | <b>S65</b> |

## 5. Characterization of compound (XI-011, 12a-12l, 13a-13l, and 14a-14s)

**XI-011, 12a-12l, 13a-13l, and 14a-14s** were prepared following the general synthesis procedure as described in the main text.

**XI-011**, yellow solid with 86 % yield.  $^1\text{H}$  NMR (400 MHz,  $\text{DMSO-}d_6$ )  $\delta$ : 9.43 (s, 3H), 8.45 (dd,  $J$  = 8.0 Hz, 12.0 Hz, 4H), 7.72-7.66 (m, 2H), 7.64-7.58 (m, 2H), 5.60 (s, 2H), 3.09 (s, 3H);  $^{13}\text{C}$  NMR (125 MHz,  $\text{DMSO-}d_6$ )  $\delta$ : 170.2, 133.5, 130.1, 130.0, 127.2, 126.3, 126.0, 124.8, 121.9, 29.2, 14.7. ESI-HRMS calcd for  $\text{C}_{17}\text{H}_{16}\text{N}_2\text{NaS}$  ( $[\text{M} + \text{Na}]^+$ ) 303.0926, found 303.0922.

Compound **12a**, white solid with 84% yield.  $^1\text{H}$  NMR (500 MHz,  $\text{DMSO-}d_6$ )  $\delta$ : 9.18 (s, 4H), 8.19 (d,  $J$  = 10.0 Hz, 1H), 8.09-8.05 (m, 1H), 7.67-7.61 (m, 2H), 7.56-7.53 (m, 1H), 7.36-7.33 (m, 1H), 5.01 (s, 2H), 2.64 (d,  $J$  = 10.0 Hz, 3H);  $^{13}\text{C}$  NMR (125 MHz,  $\text{DMSO-}d_6$ )  $\delta$ : 135.9, 133.1, 131.3, 128.4, 126.9, 126.6, 125.6, 124.8, 33.2, 19.6; ESI-HRMS calcd for  $\text{C}_{13}\text{H}_{14}\text{N}_2\text{NaS}$  ( $[\text{M} + \text{Na}]^+$ ) 253.0770, found 254.0764.

Compound **12b**, white solid with 84% yield.  $^1\text{H}$  NMR (500 MHz,  $\text{DMSO-}d_6$ )  $\delta$ : 9.28 (s, 2H), 9.08 (s, 2H), 8.19 (d,  $J$  = 10.0 Hz, 1H), 7.99 (d,  $J$  = 10.0 Hz, 1H), 7.94 (d,  $J$  = 10.0 Hz, 1H), 7.67-7.62 (m, 2H), 7.58 (t,  $J$  = 5.0 Hz, 1H), 7.50 (t,  $J$  = 5.0 Hz, 1H), 5.02 (s, 2H).  $^{13}\text{C}$  NMR (125 MHz,  $\text{DMSO-}d_6$ )  $\delta$ : 169.1, 133.6, 130.8, 130.1, 129.1, 128.9, 128.1, 126.8, 126.3, 125.6, 123.8, 32.6; ESI-HRMS calcd for  $\text{C}_{12}\text{H}_{12}\text{N}_2\text{NaS}$  ( $[\text{M} + \text{Na}]^+$ ) 239.0613, found 239.0608.

Compound **12c**, white solid with 72% yield.  $^1\text{H}$  NMR (500 MHz,  $\text{DMSO-}d_6$ )  $\delta$ : 9.12 (s, 4H), 7.31 (d,  $J$  = 10.0 Hz, 2H), 7.19-7.16 (m, 2H), 4.47 (d,  $J$  = 20.0 Hz, 2H), 2.28 (d,  $J$  = 5.0

Hz, 3H);  $^{13}\text{C}$  NMR (125 MHz, DMSO- $d_6$ )  $\delta$ : 169.6, 137.8, 132.3, 129.8, 129.4, 34.6, 21.2; ESI-HRMS calcd for  $\text{C}_9\text{H}_{12}\text{N}_2\text{NaS}$  ( $[\text{M} + \text{Na}]^+$ ) 203.0613, found 203.0609.

Compound **12d**, white solid with 76% yield.  $^1\text{H}$  NMR (500 MHz, DMSO- $d_6$ )  $\delta$ : 9.21 (s, 4H), 8.24 (s, 2H), 7.72 (d,  $J = 10.0$  Hz, 2H), 4.72 (s, 2H);  $^{13}\text{C}$  NMR (125 MHz, DMSO- $d_6$ )  $\delta$ : 168.9, 147.5, 144.0, 130.7, 124.4, 33.7; ESI-HRMS calcd for  $\text{C}_8\text{H}_9\text{N}_3\text{NaO}_2\text{S}$  ( $[\text{M} + \text{Na}]^+$ ) 234.0308, found 234.0304.

Compound **12e**, white solid with 78% yield.  $^1\text{H}$  NMR (500 MHz, DMSO- $d_6$ )  $\delta$ : 9.14 (s, 4H), 7.96–7.88 (m, 4H), 9.52 (s, 1H), 7.57–7.51 (m, 3H), 4.70–4.66 (m, 2H);  $^{13}\text{C}$  NMR (125 MHz, DMSO- $d_6$ )  $\delta$ : 168.9, 132.7, 132.6, 132.4, 128.6, 127.8, 127.7, 126.8, 126.7, 126.5, 34.6; ESI-HRMS calcd for  $\text{C}_{12}\text{H}_{12}\text{N}_2\text{NaS}$  ( $[\text{M} + \text{Na}]^+$ ) 239.0613, found 239.0610.

Compound **12f**, white solid with 76% yield.  $^1\text{H}$  NMR (500 MHz, DMSO- $d_6$ )  $\delta$ : 8.19 (d,  $J = 8.0$  Hz, 1H), 8.09–8.07 (m, 1H), 7.65–7.60 (m, 2H), 7.51–7.41 (m, 1H), 7.33 (s, 1H), 4.96 (s, 2H), 3.34 (s, 2H), 2.64 (s, 3H).  $^{13}\text{C}$  NMR (125 MHz, DMSO- $d_6$ )  $\delta$ : 165.2, 135.1, 132.6, 130.8, 128.9, 128.1, 127.8, 126.4, 126.3, 126.1, 125.0, 124.4, 124.2, 32.8, 19.1; ESI-HRMS calcd for  $\text{C}_{13}\text{H}_{15}\text{N}_3\text{NaS}$  ( $[\text{M} + \text{Na}]^+$ ) 268.0879, found 268.0868.

Compound **12g**, white solid with 77% yield.  $^1\text{H}$  NMR (500 MHz, DMSO- $d_6$ )  $\delta$ : 10.89 (s, 1H), 9.42–8.86 (m, 2H), 8.19 (d,  $J = 10.0$  Hz, 1H), 7.97 (d,  $J = 10.0$  Hz, 1H), 7.92 (d,  $J = 10.0$  Hz, 1H), 7.64–7.55 (m, 3H), 7.48 (t,  $J = 10.0$  Hz, 1H), 5.28–4.83 (m, 4H);  $^{13}\text{C}$  NMR (125 MHz, DMSO- $d_6$ )  $\delta$ : 133.5, 130.7, 128.9, 127.9, 126.6, 126.2, 125.5, 123.8, 32.8; ESI-HRMS calcd for  $\text{C}_{12}\text{H}_{13}\text{N}_3\text{NaS}$  ( $[\text{M} + \text{Na}]^+$ ) 254.0722, found 254.0716.

Compound **12h**, white solid with 81% yield.  $^1\text{H}$  NMR (500 MHz, DMSO- $d_6$ )  $\delta$ : 9.41 (s, 3H), 8.21 (d,  $J = 9.5$  Hz, 1H), 8.08–8.06 (m, 1H), 7.66–7.60 (m, 2H), 7.54–7.51 (m, 1H), 7.35–7.33 (m, 1H), 5.05–5.01 (m, 2H), 2.91 (s, 3H), 2.64 (s, 3H), 2.07 (s, 1H);  $^{13}\text{C}$  NMR (125 MHz, DMSO- $d_6$ )  $\delta$ : 131.0, 130.0, 129.3, 128.9, 127.1, 125.6, 124.0, 19.0; ESI-HRMS calcd for  $\text{C}_{14}\text{H}_{16}\text{N}_2\text{NaS}$  ( $[\text{M} + \text{Na}]^+$ ) 267.0926, found 267.0917.

Compound **12i**, white solid with 80% yield.  $^1\text{H}$  NMR (500 MHz, DMSO- $d_6$ )  $\delta$ : 8.22 (d,  $J = 10.0$  Hz, 1H), 8.12 – 8.05 (m, 1H), 7.69 – 7.61 (m, 2H), 7.60 – 7.56 (m, 1H), 7.36 (d,  $J = 5.0$  Hz, 1H), 5.14 (s, 2H), 2.65 (s, 3H), 2.22 (s, 3H);  $^{13}\text{C}$  NMR (125 MHz, DMSO- $d_6$ )  $\delta$ : 172.3, 135.8, 132.6, 130.9, 128.3, 126.9, 126.6, 126.3, 126.2, 126.2, 125.1, 124.3, 33.3, 24.5, 19.2; ESI-HRMS calcd for  $\text{C}_{15}\text{H}_{16}\text{N}_2\text{NaOS}$  ( $[\text{M} + \text{Na}]^+$ ) 295.0876, found 295.0869.



Compound **12j**, white solid with 69% yield.  $^1\text{H}$  NMR (500 MHz,  $\text{DMSO-}d_6$ )  $\delta$ : 7.34 (d,  $J$  = 10.0 Hz, 2H), 7.18 (d,  $J$  = 5.0 Hz, 2H), 4.65 (s, 2H), 2.27 (s, 3H), 2.21 (s, 3H);  $^{13}\text{C}$  NMR (125 MHz,  $\text{DMSO-}d_6$ )  $\delta$ : 172.2, 169.5, 137.7, 130.7, 129.5, 129.2, 34.6, 24.5, 20.7; ESI-HRMS calcd for  $\text{C}_{11}\text{H}_{14}\text{N}_2\text{NaOS}$  ( $[\text{M} + \text{Na}]^+$ ) 245.0719, found 245.0714.

Compound **12k**, white solid with 71% yield.  $^1\text{H}$  NMR (500 MHz,  $\text{DMSO-}d_6$ )  $\delta$ : 8.45 (d,  $J$  = 10.0 Hz, 1H), 8.01 (t,  $J$  = 10.0 Hz, 2H), 7.86–7.77 (m, 1H), 7.64 (d,  $J$  = 10.0 Hz, 2H), 4.73 (s, 2H).  $^{13}\text{C}$  NMR (125 MHz,  $\text{DMSO-}d_6$ )  $\delta$ : 156.6, 146.5, 137.9, 130.3, 128.1, 128.0, 127.0, 126.9, 121.3, 36.4; ESI-HRMS calcd for  $\text{C}_{11}\text{H}_{12}\text{N}_4\text{NaS}$  ( $[\text{M} + \text{Na}]^+$ ) 255.0675, found 255.0668.

Compound **12l**, white solid with 78% yield.  $^1\text{H}$  NMR (500 MHz,  $\text{DMSO-}d_6$ )  $\delta$ : 10.16 (s, 1H), 9.80 (s, 1H), 9.15 (s, 1H), 8.47 (d,  $J$  = 10.0 Hz, 1H), 8.03 (d,  $J$  = 10.0 Hz, 1H), 7.98 (d,  $J$  = 10.0 Hz, 1H), 7.83 (t,  $J$  = 5.0 Hz, 1H), 7.67–7.63 (m, 2H), 7.84–7.83 (m, 1H), 2.97 (d,  $J$  = 5.0 Hz, 3H).  $^{13}\text{C}$  NMR (125 MHz,  $\text{DMSO-}d_6$ )  $\delta$ : 166.8, 156.5, 146.5, 138.0, 130.5, 128.1, 128.0, 127.1, 127.0, 121.3, 36.8, 30.6; ESI-HRMS calcd for  $\text{C}_{12}\text{H}_{13}\text{N}_3\text{NaS}$  ( $[\text{M} + \text{Na}]^+$ ) 254.0722, found 254.0715.

Compound **13a**, yellow solid with 76% yield.  $^1\text{H}$  NMR (500 MHz,  $\text{DMSO-}d_6$ )  $\delta$ : 8.44 (d,  $J$  = 10.0 Hz, 4H), 7.68 (t,  $J$  = 5.0 Hz, 2H), 7.62 (t,  $J$  = 5.0 Hz, 2H), 5.54 (s, 2H), 3.43 (s, 5H), 3.10 (s, 3H).  $^{13}\text{C}$  NMR (100 MHz,  $\text{DMSO-}d_6$ )  $\delta$ : 166.1, 133.3, 130.1, 130.0, 127.1, 126.3, 126.0, 124.9, 123.1, 29.3, 14.8; ESI-HRMS calcd for  $\text{C}_{17}\text{H}_{17}\text{N}_3\text{NaS}$  ( $[\text{M} + \text{Na}]^+$ ) 318.1035, found 318.1025.

Compound **13b**, yellow solid with 88% yield.  $^1\text{H}$  NMR (500 MHz,  $\text{DMSO-}d_6$ )  $\delta$ : 9.33 (s, 2H), 9.17 (s, 2H), 8.45 (d,  $J$  = 10 Hz, 4H), 7.70 (t,  $J$  = 5.0 Hz, 2H), 7.63 (t,  $J$  = 5.0 Hz, 2H), 5.57 (s, 2H), 3.10 (s, 3H).  $^{13}\text{C}$  NMR (125 MHz,  $\text{DMSO-}d_6$ )  $\delta$ : 169.7, 133.1, 129.7, 129.5, 126.7, 125.9, 125.5, 124.3, 121.4, 28.7, 14.3; ESI-HRMS calcd for  $\text{C}_{19}\text{H}_{19}\text{N}_2\text{OS}$  ( $[\text{M} + \text{H}]^+$ ) 323.1213, found 323.1238.

Compound **13c**, yellow solid with 69% yield.  $^1\text{H}$  NMR (400 MHz,  $\text{DMSO-}d_6$ )  $\delta$ : 8.43 (d,  $J$  = 8.0 Hz, 2H), 8.36 (d,  $J$  = 8.0 Hz, 2H), 8.19 (s, 5H), 7.69–7.59 (m, 4H), 5.26 (s, 2H), 3.09 (s, 3H);  $^{13}\text{C}$  NMR (100 MHz,  $\text{DMSO-}d_6$ )  $\delta$ : 164.4, 162.8, 130.0, 130.0, 126.9, 126.3, 125.9, 125.0, 124.4, 29.3, 14.7. ESI-HRMS calcd for  $\text{C}_{18}\text{H}_{18}\text{N}_4\text{NaS}$  ( $[\text{M} + \text{Na}]^+$ ) 345.1144, found 345.1138.

Compound **13d**, yellow solid with 82% yield.  $^1\text{H}$  NMR (500 MHz,  $\text{DMSO-}d_6$ )  $\delta$ : 9.38 (s, 2H), 9.21 (s, 2H), 8.56–8.54 (m, 4H), 7.79–7.77 (m, 4H), 5.61 (s, 2H).  $^{13}\text{C}$  NMR (125 MHz,

DMSO-*d*<sub>6</sub>)  $\delta$ : 166.2, 133.0, 129.7, 129.5, 126.7, 125.8, 125.5, 124.5, 121.8, 30.7, 29.3, 14.3.

ESI-HRMS calcd for C<sub>18</sub>H<sub>18</sub>N<sub>2</sub>NaS ([M + Na]<sup>+</sup>) 317.1083, found 317.1076.

Compound **13e**, yellow solid with 79% yield. <sup>1</sup>H NMR (500 MHz, DMSO-*d*<sub>6</sub>)  $\delta$ : 9.03 (s, 2H), 8.47 – 8.33 (m, 4H), 7.72 – 7.56 (m, 4H), 5.75 – 5.61 (m, 2H), 5.32 (s, 1H), 3.29 (s, 3H), 3.09 (s, 3H).; <sup>13</sup>C NMR (125 MHz, DMSO-*d*<sub>6</sub>)  $\delta$ : 170.8, 167.1, 133.4, 132.8, 129.8, 129.7, 129.5, 126.9, 126.7, 125.9, 125.5, 124.3, 121.5, 121.1, 42.3, 30.3, 28.8, 14.3. ESI-HRMS calcd for C<sub>18</sub>H<sub>19</sub>N<sub>3</sub>NaS ([M + Na]<sup>+</sup>) 332.1192, found 332.1182.

Compound **13f**, yellow solid with 85% yield. <sup>1</sup>H NMR (500 MHz, DMSO-*d*<sub>6</sub>)  $\delta$ : 8.51 (d, *J* = 10.0 Hz, 1H), 8.48-8.32 (m, 3H), 7.69 (t, *J* = 5.0 Hz, 2H), 7.63 (t, *J* = 5.0 Hz, 2H), 5.68 (s, 1H), 3.31 (s, 3H), 2.11 (d, *J* = 30.0 Hz, 5H), 1.97-1.82 (m, 2H). <sup>13</sup>C NMR (125 MHz, DMSO-*d*<sub>6</sub>)  $\delta$ : 129.7, 129.5, 126.6, 125.8, 125.5, 124.5, 19.1, 14.2; ESI-HRMS calcd for C<sub>20</sub>H<sub>21</sub>N<sub>3</sub>NaS ([M + Na]<sup>+</sup>) 358.1348, found 358.1338.

Compound **13g**, yellow solid with 81% yield. <sup>1</sup>H NMR (500 MHz, DMSO-*d*<sub>6</sub>)  $\delta$ : 12.34 (s, 1H), 8.39 (t, *J* = 6.5 Hz, 2H), 8.32 (t, *J* = 6.5 Hz, 2H), 7.56-7.58 (m, 4H), 7.21 (s, 2H), 5.27 (s, 3H). <sup>13</sup>C NMR (125 MHz, DMSO-*d*<sub>6</sub>)  $\delta$ : 138.7, 131.3, 129.7, 129.4, 126.8, 126.1, 125.7, 125.4, 124.9, 31.9, 14.3. ESI-HRMS calcd for C<sub>19</sub>H<sub>16</sub>N<sub>2</sub>NaS ([M + Na]<sup>+</sup>) 327.0926, found 327.0917.

Compound **13h**, yellow solid with 84% yield. <sup>1</sup>H NMR (500 MHz, DMSO-*d*<sub>6</sub>)  $\delta$ : 8.41 (dd, *J* = 10.0 Hz, 20.0 Hz, 4H), 7.66-7.57 (m, 4H), 5.49 (d, *J* = 20.0 Hz, 2H), 5.29 (s, 1H), 3.09 (s, 3H). <sup>13</sup>C NMR (125 MHz, DMSO-*d*<sub>6</sub>)  $\delta$ : 131.7, 129.5, 129.5, 126.5, 126.4, 125.7, 125.4, 125.1, 124.6, 85.8, 27.2, 14.1; ESI-HRMS calcd for C<sub>20</sub>H<sub>16</sub>N<sub>2</sub>NaO<sub>2</sub>S ([M + Na]<sup>+</sup>) 371.0825, found 371.0810.

Compound **13i**, yellow solid with 78% yield. <sup>1</sup>H NMR (400 MHz, DMSO-*d*<sub>6</sub>)  $\delta$ : 8.45 – 8.40 (m, 4H), 8.22 (s, 1H), 7.64 – 7.57 (m, 4H), 5.55 (s, 2H), 4.34 (q, *J* = 8.0 Hz, 2H), 1.32 (t, *J* = 8.0 Hz, 3H); <sup>13</sup>C NMR (100 MHz, DMSO-*d*<sub>6</sub>)  $\delta$ : 143.0, 132.3, 129.5, 129.5, 127.4, 126.5, 126.3, 125.7, 125.4, 124.9, 124.6, 61.0, 31.6, 14.3. ESI-HRMS calcd for C<sub>22</sub>H<sub>20</sub>N<sub>2</sub>NaO<sub>2</sub>S ([M + Na]<sup>+</sup>) 399.1138, found 399.1129.

Compound **13j**, yellow solid with 85% yield. <sup>1</sup>H NMR (500 MHz, DMSO-*d*<sub>6</sub>)  $\delta$ : 11.52 (s, 1H), 9.86 (s, 1H), 9.46 (s, 1H), 8.56 (d, *J* = 10.0 Hz, 2H), 8.46 (d, *J* = 10.0 Hz, 2H), 7.71 (t, *J* = 5.0 Hz, 2H), 7.64 (t, *J* = 5.0 Hz, 2H), 7.55 (m, 2H), 7.44 (d, *J* = 10.0 Hz, 3H), 5.74 (s, 2H), 3.11 (s, 3H). <sup>13</sup>C NMR (125 MHz, DMSO-*d*<sub>6</sub>)  $\delta$ : 135.1, 133.2, 130.0, 129.8, 129.5, 128.3,

126.7, 125.9, 125.6, 125.4, 124.5, 29.7, 14.3; ESI-HRMS calcd for  $C_{23}H_{20}N_2NaS$  ( $[M + Na]^+$ ) 379.1245, found 379.1228.

Compound **13k**, yellow solid with 82% yield.  $^1H$  NMR (500 MHz,  $DMSO-d_6$ )  $\delta$ : 12.34 (s, 1H), 8.39 (t,  $J = 6.5$  Hz, 2H), 8.32 (t,  $J = 6.5$  Hz, 2H), 7.56–7.58 (m, 4H), 7.21 (s, 2H), 5.27 (s, 3H).  $^{13}C$  NMR (125 MHz,  $DMSO-d_6$ )  $\delta$ : 138.7, 131.3, 129.7, 129.4, 126.8, 126.1, 125.7, 125.4, 124.9, 31.9, 14.3. ESI-HRMS calcd for  $C_{19}H_{16}N_2NaS$  ( $[M + Na]^+$ ) 327.0926, found 327.0917.  $^1H$  NMR (400 MHz,  $DMSO-d_6$ )  $\delta$ : 8.48 – 8.40 (m, 4H), 7.68 – 7.57 (m, 4H), 7.48 – 7.32 (m, 10H), 7.29 – 7.20 (m, 2H), 5.60 (s, 2H), 3.08 (s, 3H).  $^{13}C$  NMR (100 MHz,  $DMSO-d_6$ )  $\delta$ : 140.0, 133.4, 130.4, 130.2, 130.0, 129.8, 128.9, 128.8, 127.5, 127.1, 126.3, 126.0, 125.1, 124.9, 124.1, 123.7, 122.7, 31.2, 14.8; ESI-HRMS calcd for  $C_{29}H_{24}N_2NaS$  ( $[M + Na]^+$ ) 455.1558, found 455.1541.

Compound **13l**, yellow solid with 85% yield.  $^1H$  NMR (500 MHz,  $DMSO-d_6$ )  $\delta$ : 9.75 (s, 1H), 9.51 (s, 1H), 9.28 (s, 1H), 8.46 (dd,  $J = 10.0$  Hz, 15.0 Hz, 4H), 7.69 (t,  $J = 5.0$  Hz, 2H), 7.62 (t,  $J = 5.0$  Hz, 2H), 5.60 (s, 2H), 3.10 (s, 3H), 1.61–1.55 (m, 2), 1.29 (s, 1H), 0.90–0.87 (m, 3H).  $^{13}C$  NMR (100 MHz,  $DMSO-d_6$ )  $\delta$ : 165.9, 133.3, 130.2, 130.0, 127.1, 126.3, 126.0, 125.1, 122.6, 44.6, 31.4, 30.1, 27.9, 26.3, 22.5, 14.8, 14.4; ESI-HRMS calcd for  $C_{23}H_{28}N_2NaS$  ( $[M + Na]^+$ ) 387.1865, found 387.1858.

Compound **14a**, yellow solid with 71% yield.  $^1H$  NMR (500 MHz,  $DMSO-d_6$ )  $\delta$ : 9.38 (s, 4H), 8.45 (dd,  $J = 10.0$  Hz, 15.0 Hz, 4H), 7.73–7.58 (m, 4H), 5.57 (s, 2H), 3.66 (q,  $J = 10.0$  Hz, 2H), 1.36 (t,  $J = 10.0$  Hz, 3H).  $^{13}C$  NMR (125 MHz,  $DMSO-d_6$ )  $\delta$ : 169.8, 139.1, 129.8, 128.5, 126.7, 125.8, 125.3, 124.5, 121.7, 28.7, 20.7, 15.7; ESI-HRMS calcd for  $C_{18}H_{18}N_2NaS$  ( $[M + Na]^+$ ) 317.1083, found 317.1071.

Compound **14b**, yellow solid with 75% yield.  $^1H$  NMR (500 MHz,  $DMSO-d_6$ )  $\delta$ : 10.09 (s, 1H), 9.71 (s, 1H), 9.34 (s, 1H), 8.50 (d,  $J = 10.0$  Hz, 2H), 8.42 (d,  $J = 10.0$  Hz, 2H), 7.76 (t,  $J = 5.0$  Hz, 2H), 7.62 (t,  $J = 5.0$  Hz, 2H), 5.65 (s, 2H), 3.66 (q,  $J = 5.0$  Hz, 2H), 3.00 (d,  $J = 5.0$  Hz, 3H), 1.36 (t,  $J = 5.0$  Hz, 3H).  $^{13}C$  NMR (125 MHz,  $DMSO-d_6$ )  $\delta$ : 166.1, 139.0, 129.9, 128.6, 126.6, 125.7, 125.3, 124.7, 122.3, 30.7, 29.4, 20.7, 15.7; ESI-HRMS calcd for  $C_{19}H_{20}N_2NaS$  ( $[M + Na]^+$ ) 331.1239, found 331.1229.

Compound **14c**, yellow solid with 81% yield.  $^1H$  NMR (500 MHz,  $DMSO-d_6$ )  $\delta$ : 9.39 (s, 2H), 8.52 – 8.30 (m, 4H), 7.73 – 7.56 (m, 4H), 5.69 (s, 1H), 5.37 (s, 2H), 3.63 (q,  $J = 7.5$  Hz, 2H), 3.47 (s, 3H), 1.33 (t,  $J = 7.5$  Hz, 3H).  $^{13}C$  NMR (125 MHz,  $DMSO-d_6$ )  $\delta$ : 170.7, 167.0,

139.4, 138.8, 129.9, 128.6, 126.8, 126.6, 125.7, 125.3, 124.5, 122.0, 121.5, 42.4, 30.5, 28.9, 20.7, 15.7; ESI-HRMS calcd for  $C_{19}H_{21}N_3NaS$  ( $[M + Na]^+$ ) 346.1348, found 346.1357.

Compound **14d**, yellow solid with 81% yield.  $^1H$  NMR (400 MHz,  $DMSO-d_6$ )  $\delta$ : 8.41 (d,  $J = 8.0$  Hz, 2H), 8.36 (d,  $J = 8.0$  Hz, 2H), 7.69 – 7.57 (m, 5H), 7.18 (s, 2H), 7.01 (s, 2H), 5.25 (s, 2H), 3.65 (q,  $J = 8.0$  Hz, 2H), 1.35 (t,  $J = 8.0$  Hz, 3H);  $^{13}C$  NMR (100 MHz,  $DMSO-d_6$ )  $\delta$ : 187.6, 163.9, 162.4, 161.4, 138.2, 129.7, 128.6, 126.4, 125.7, 125.2, 124.7, 124.2, 28.8, 20.7, 15.8. 28.8, 20.7, 15.8; ESI-HRMS calcd for  $C_{19}H_{20}N_4NaS$  ( $[M + Na]^+$ ) 359.1301, found 359.1291.

Compound **14e**, yellow solid with 85% yield.  $^1H$  NMR (400 MHz,  $DMSO-d_6$ )  $\delta$ : 8.54 – 8.39 (m, 4H), 7.73 – 7.60 (m, 4H), 5.67 (s, 2H), 3.67 (d,  $J = 8.0$  Hz, 2H), 2.26 (s, 3H), 1.36 (t,  $J = 8.0$  Hz, 3H);  $^{13}C$  NMR (100 MHz,  $DMSO-d_6$ )  $\delta$ : 181.7, 172.0, 139.2, 130.1, 129.4, 128.5, 126.9, 126.7, 126.5, 125.8, 125.7, 125.6, 125.4, 125.3, 125.1, 124.6, 23.8, 20.8, 15.7; ESI-HRMS calcd for  $C_{20}H_{20}N_2NaOS$  ( $[M + Na]^+$ ) 359.1189, found 359.1179.

Compound **14f**, yellow solid with 77% yield.  $^1H$  NMR (500 MHz,  $DMSO-d_6$ )  $\delta$ : 10.03 (t,  $J = 5.0$  Hz, 1H), 9.75 (s, 1H), 9.52 (s, 1H), 8.52 (d,  $J = 10.0$  Hz, 2H), 8.41 (d,  $J = 10.0$  Hz, 2H), 7.76 (t,  $J = 5.0$  Hz, 2H), 7.61 (t,  $J = 5.0$  Hz, 2H), 5.67 (s, 2H), 3.65 (q,  $J = 10.0$  Hz, 2H), 1.59 (t,  $J = 5.0$  Hz, 3H), 1.36-1.28 (m, 10H), 0.89-0.86 (m, 3H).  $^{13}C$  NMR (125 MHz,  $DMSO-d_6$ )  $\delta$ : 165.2, 138.9, 129.9, 128.5, 126.5, 125.7, 125.2, 124.8, 122.5, 43.9, 30.8, 29.5, 27.4, 25.8, 22.0, 20.7, 15.7, 13.9; ESI-HRMS calcd for  $C_{24}H_{30}N_2NaS$  ( $[M + Na]^+$ ) 401.2022, found 401.2017.

Compound **14g**, yellow solid with 73% yield.  $^1H$  NMR (400 MHz,  $DMSO-d_6$ )  $\delta$ : 8.63 (d,  $J = 8.0$  Hz, 2H), 8.43 (d,  $J = 8.0$  Hz, 2H), 7.87 (s, 1H), 7.76 (s, 3H), 7.71 – 7.61 (m, 4H), 5.82 (s, 2H), 3.66 (q,  $J = 8.0$  Hz, 2H), 1.36 (t,  $J = 8.0$  Hz, 3H);  $^{13}C$  NMR (100 MHz,  $DMSO-d_6$ )  $\delta$ : 139.2, 131.1, 130.0, 129.5, 128.6, 126.7, 125.8, 125.3, 124.9, 122.4, 122.0, 30.0, 20.8, 15.7; ESI-HRMS calcd for  $C_{25}H_{21}F_3N_2NaS$  ( $[M + Na]^+$ ) 461.1270, found 461.1262.

Compound **14h**, yellow solid with 74% yield.  $^1H$  NMR (500 MHz,  $DMSO-d_6$ )  $\delta$ : 8.47 – 8.40 (m, 4H), 7.70 – 7.65 (m, 2H), 7.64 – 7.59 (m, 2H), 5.57 (s, 2H), 3.63 – 3.56 (m, 2H), 1.73 (q,  $J = 7.5$  Hz, 2H), 1.10 (t,  $J = 7.5$  Hz, 3H);  $^{13}C$  NMR (125 MHz,  $DMSO-d_6$ )  $\delta$ : 183.9, 169.8, 137.8, 129.8, 129.0, 126.8, 125.8, 125.6, 124.5, 121.8, 29.5, 28.7, 24.6, 14.4; ESI-HRMS calcd for  $C_{19}H_{20}N_2NaS$  ( $[M + Na]^+$ ) 331.1239, found 331.1227.

Compound **14i**, yellow solid with 87% yield.  $^1\text{H}$  NMR (500 MHz,  $\text{DMSO-}d_6$ )  $\delta$ : 9.84 (s, 1H), 9.58 (s, 1H), 9.23 (s, 1H), 8.71 (s, 1H), 8.47 (d,  $J = 10.0$  Hz, 2H), 8.16 (d,  $J = 10.0$  Hz, 2H), 7.68 (t,  $J = 10.0$  Hz, 2H), 7.59 (t,  $J = 10.0$  Hz, 2H), 5.62 (s, 2H), 3.00 (d,  $J = 5.0$  Hz, 3H).  $^{13}\text{C}$  NMR (125 MHz,  $\text{DMSO-}d_6$ )  $\delta$ : 166.1, 131.0, 129.9, 129.3, 128.9, 127.1, 125.6, 123.9, 123.8, 30.7, 29.0; ESI-HRMS calcd for  $\text{C}_{17}\text{H}_{16}\text{N}_2\text{NaS}$  ( $[\text{M} + \text{Na}]^+$ ) 303.0926, found 303.0916.

Compound **14j**, yellow solid with 89% yield.  $^1\text{H}$  NMR (500 MHz,  $\text{DMSO-}d_6$ )  $\delta$ : 8.70 (s, 1H), 8.43 (d,  $J = 10.0$  Hz, 2H), 8.16 (d,  $J = 10.0$  Hz, 2H), 7.68 (t,  $J = 10.0$  Hz, 2H), 7.58 (t,  $J = 10.0$  Hz, 2H), 5.55 (s, 2H).  $^{13}\text{C}$  NMR (125 MHz,  $\text{DMSO-}d_6$ )  $\delta$ : 131.0, 129.8, 129.3, 127.1, 125.5, 123.9; ESI-HRMS calcd for  $\text{C}_{16}\text{H}_{15}\text{N}_3\text{NaS}$  ( $[\text{M} + \text{Na}]^+$ ) 304.0879, found 304.0870.

Compound **14k**, yellow solid with 81% yield.  $^1\text{H}$  NMR (400 MHz,  $\text{DMSO-}d_6$ )  $\delta$ : 8.73–8.71 (s, 1H), 8.65–8.31 (m, 2H), 8.16 (d,  $J = 8.3$  Hz, 2H), 7.69 (t,  $J = 7.3$  Hz, 2H), 7.59 (t,  $J = 7.3$  Hz, 2H), 5.84–5.41 (m, 2H), 2.35–1.61 (m, 6H).  $^{13}\text{C}$  NMR (100 MHz,  $\text{DMSO-}d_6$ )  $\delta$ : 164.4, 131.6, 130.5, 129.8, 129.5, 127.7, 126.1, 124.5, 29.6, 25.5, 19.7; ESI-HRMS calcd for  $\text{C}_{19}\text{H}_{20}\text{N}_3\text{S}$  ( $[\text{M} + \text{H}]^+$ ) 322.1372, found 322.1326.

Compound **14l**, yellow solid with 66% yield.  $^1\text{H}$  NMR (500 MHz,  $\text{DMSO-}d_6$ )  $\delta$ : 8.74 (s, 1H), 8.48 (d,  $J = 10.0$  Hz, 2H), 8.18 (d,  $J = 10.0$  Hz, 2H), 7.69 (t,  $J = 10.0$  Hz, 2H), 7.60 (t,  $J = 10.0$  Hz, 2H), 5.73 (s, 2H), 2.26 (s, 3H);  $^{13}\text{C}$  NMR (125 MHz,  $\text{DMSO-}d_6$ )  $\delta$ : 172.2, 131.0, 130.2, 129.4, 129.3, 129.1, 127.4, 125.7, 125.6, 124.0, 123.8, 122.4, 29.2, 24.5, 23.8; ESI-HRMS calcd for  $\text{C}_{18}\text{H}_{16}\text{N}_2\text{NaS}$  ( $[\text{M} + \text{Na}]^+$ ) 331.0876, found 331.0867.

Compound **14m**, yellow solid with 84% yield.  $^1\text{H}$  NMR (500 MHz,  $\text{DMSO-}d_6$ )  $\delta$ : 9.38 (s, 2H), 9.21 (s, 2H), 8.56–8.54 (m, 4H), 7.79–7.77 (m, 4H), 5.61 (s, 2H).  $^{13}\text{C}$  NMR (125 MHz,  $\text{DMSO-}d_6$ )  $\delta$ : 169.2, 130.6, 129.7, 128.1, 128.1, 127.6, 125.0, 124.7, 124.4, 28.6; ESI-HRMS calcd for  $\text{C}_{16}\text{H}_{13}\text{BrN}_2\text{NaS}$  ( $[\text{M} + \text{Na}]^+$ ) 366.9875, found 366.9868.

Compound **14n**, yellow solid with 83% yield.  $^1\text{H}$  NMR (500 MHz,  $\text{DMSO-}d_6$ )  $\delta$ : 9.88 (s, 1H), 9.61 (s, 1H), 9.25 (s, 1H), 8.61–8.50 (m, 4H), 7.83–7.71 (m, 4H), 5.64 (s, 2H), 2.99 (d,  $J = 5.0$  Hz, 3H).  $^{13}\text{C}$  NMR (125 MHz,  $\text{DMSO-}d_6$ )  $\delta$ : 166.6, 131.5, 130.5, 129.8, 129.4, 127.7, 126.1, 124.5, 124.3; ESI-HRMS calcd for  $\text{C}_{17}\text{H}_{15}\text{BrN}_2\text{NaS}$  ( $[\text{M} + \text{Na}]^+$ ) 381.0032, found 381.0025.

Compound **14o**, yellow solid with 83% yield.  $^1\text{H}$  NMR (400 MHz,  $\text{DMSO-}d_6$ )  $\delta$ : 8.52 (d,  $J = 8.0$  Hz, 4H), 7.77 (dd,  $J = 4.0$  Hz, 8.0 Hz, 4H), 5.57 (s, 2H).  $^{13}\text{C}$  NMR (100 MHz,  $\text{DMSO-}$

$d_6$ )  $\delta$ : 130.9, 129.8, 129.2, 127.0, 125.5, 123.8; ESI-HRMS calcd for  $C_{16}H_{14}BrN_3NaS$  ( $[M + Na]^+$ ) 381.9984, found 381.9975.

Compound **14p**, yellow solid with 70% yield.  $^1H$  NMR (500 MHz,  $DMSO-d_6$ )  $\delta$ : 10.04 (s, 1H), 9.77 (s, 1H), 9.36 (s, 1H), 7.33 (t,  $J = 5.0$  Hz, 2H), 7.27 (d,  $J = 10.0$  Hz, 2H), 7.04 (d,  $J = 10.0$  Hz, 2H), 7.00 (t,  $J = 5.0$  Hz, 2H), 4.88 (s, 2H), 3.65 (s, 2H).  $^{13}C$  NMR (125 MHz,  $DMSO-d_6$ )  $\delta$ : 168.7, 138.3, 129.8, 126.1, 120.7, 116.4, 114.8, 72.6, 43.7; ESI-HRMS calcd for  $C_{15}H_{14}N_4NaS$  ( $[M + Na]^+$ ) 305.0831, found 305.0828.

Compound **14q**, yellow solid with 77% yield.  $^1H$  NMR (500 MHz,  $DMSO-d_6$ )  $\delta$ : 11.04 (s, 1H), 9.81 (s, 1H), 9.69 (s, 1H), 9.37 (s, 1H), 7.40 (d,  $J = 10.0$  Hz, 2H), 7.31 (t,  $J = 5.0$  Hz, 2H), 7.02 (m, 4H), 3.62 (s, 2H).  $^{13}C$  NMR (125 MHz,  $DMSO-d_6$ )  $\delta$ : 170.9, 137.4, 129.4, 125.7, 120.4, 119.4, 114.5, 67.8, 47.8; ESI-HRMS calcd for  $C_{15}H_{13}N_3NaS$  ( $[M + Na]^+$ ) 290.0722, found 290.0715.

Compound **14r**, yellow solid with 64% yield.  $^1H$  NMR (500 MHz,  $DMSO-d_6$ )  $\delta$ : 10.85 (s, 1H), 10.26 (s, 1H), 9.68 (s, 1H), 7.41 (d,  $J = 10.0$  Hz, 2H), 7.33–7.31 (m, 2H), 7.04–6.98 (m, 4H), 3.59 (s, 2H), 3.48 (q,  $J = 5.0$  Hz, 2H), 1.63–1.60 (m, 2H), 1.37–1.28 (m, 6H), 0.9 (t,  $J = 5.0$  Hz, 4H).  $^{13}C$  NMR (125 MHz,  $DMSO-d_6$ )  $\delta$ : 165.2, 131.0, 129.9, 129.3, 128.9, 127.1, 125.5, 124.0, 123.9, 44.0, 30.8, 27.4, 25.8, 22.0, 13.9; ESI-HRMS calcd for  $C_{21}H_{25}N_3NaS$  ( $[M + Na]^+$ ) 374.1661, found 374.1653.

Compound **14s**, white solid with 73% yield.  $^1H$  NMR (500 MHz,  $DMSO-d_6$ )  $\delta$ : 9.71 (d,  $J = 50.0$  Hz, 2H), 9.22 (d,  $J = 25.0$  Hz, 2H), 7.66–7.61 (m, 2H), 7.30–7.26 (m, 2H), 7.23 (s, 4H), 6.84 (d,  $J = 50.0$  Hz, 1H), 3.62 (q,  $J = 10.0$  Hz, 10.0 Hz, 3H), 2.93–2.88 (m, 2H);  $^{13}C$  NMR (125 MHz,  $DMSO-d_6$ )  $\delta$ : 167.2, 143.5, 141.1, 137.7, 135.5, 131.3, 129.9, 129.4, 127.2, 126.8, 126.0, 125.4, 71.2, 32.6, 31.9; ESI-HRMS calcd for  $C_{16}H_{16}N_2NaS$  ( $[M + Na]^+$ ) 291.0926, found 291.0921.

## **Table of contents**

**Figure S1-S2. NMR spectra of compound XI-011.**

**Figure S3-S4. NMR spectra of compound 12a.**

**Figure S5-S6. NMR spectra of compound 12b.**

**Figure S7-S8. NMR spectra of compound 12c.**

**Figure S9-S10. NMR spectra of compound 12d.**

**Figure S11-S12. NMR spectra of compound 12e.**

**Figure S13-S14. NMR spectra of compound 12f.**

**Figure S15-S16. NMR spectra of compound 12g.**

**Figure S17-S18. NMR spectra of compound 12h.**

**Figure S19-S20. NMR spectra of compound 12i.**

**Figure S21-S22. NMR spectra of compound 12j.**

**Figure S23-S24. NMR spectra of compound 12k.**

**Figure S25-S26. NMR spectra of compound 12l.**

**Figure S27-S28. NMR spectra of compound 13a.**

**Figure S29-S30. NMR spectra of compound 13b.**

**Figure S31-S32. NMR spectra of compound 13c.**

**Figure S33-S34. NMR spectra of compound 13d.**

**Figure S35-S36. NMR spectra of compound 13e.**

**Figure S37-S38. NMR spectra of compound 13f.**

**Figure S39-S40. NMR spectra of compound 13g.**

**Figure S41-S42. NMR spectra of compound 13h.**

**Figure S43-S44. NMR spectra of compound 13i.**

**Figure S45-S46. NMR spectra of compound 13j.**

**Figure S47-S48. NMR spectra of compound 13k.**

**Figure S49-S50. NMR spectra of compound 13l.**

**Figure S51-S52. NMR spectra of compound 14a.**

**Figure S53-S54. NMR spectra of compound 14b.**

**Figure S55-S56. NMR spectra of compound 14c.**

**Figure S57-S58. NMR spectra of compound 14d.**

**Figure S59-S60. NMR spectra of compound 14e.**

**Figure S61-S62. NMR spectra of compound 14f.**

**Figure S63-S64. NMR spectra of compound 14g.**

**Figure S65-S66. NMR spectra of compound 14h.**

**Figure S67-S68. NMR spectra of compound 14i.**

**Figure S69-S70. NMR spectra of compound 14j.**

**Figure S71-S72. NMR spectra of compound 14k.**

**Figure S73-S74. NMR spectra of compound 14l.**

**Figure S75-S76. NMR spectra of compound 14m.**

**Figure S77-S78. NMR spectra of compound 14n.**

**Figure S79-S80. NMR spectra of compound 14o.**

**Figure S81-S82. NMR spectra of compound 14p.**

**Figure S83-S84. NMR spectra of compound 14q.**

**Figure S85-S86. NMR spectra of compound 14r.**

**Figure S87-S88. NMR spectra of compound 14s.**



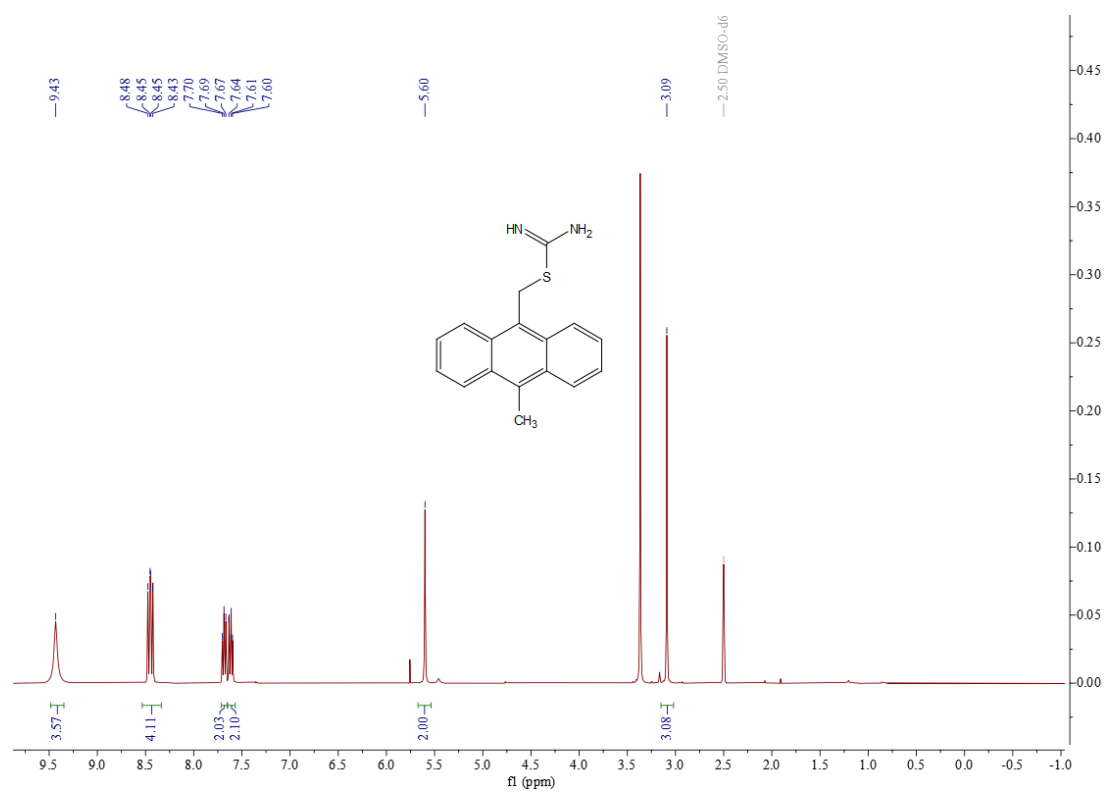

**Figure S1  $^1\text{H}$  NMR spectrum of XI-011**

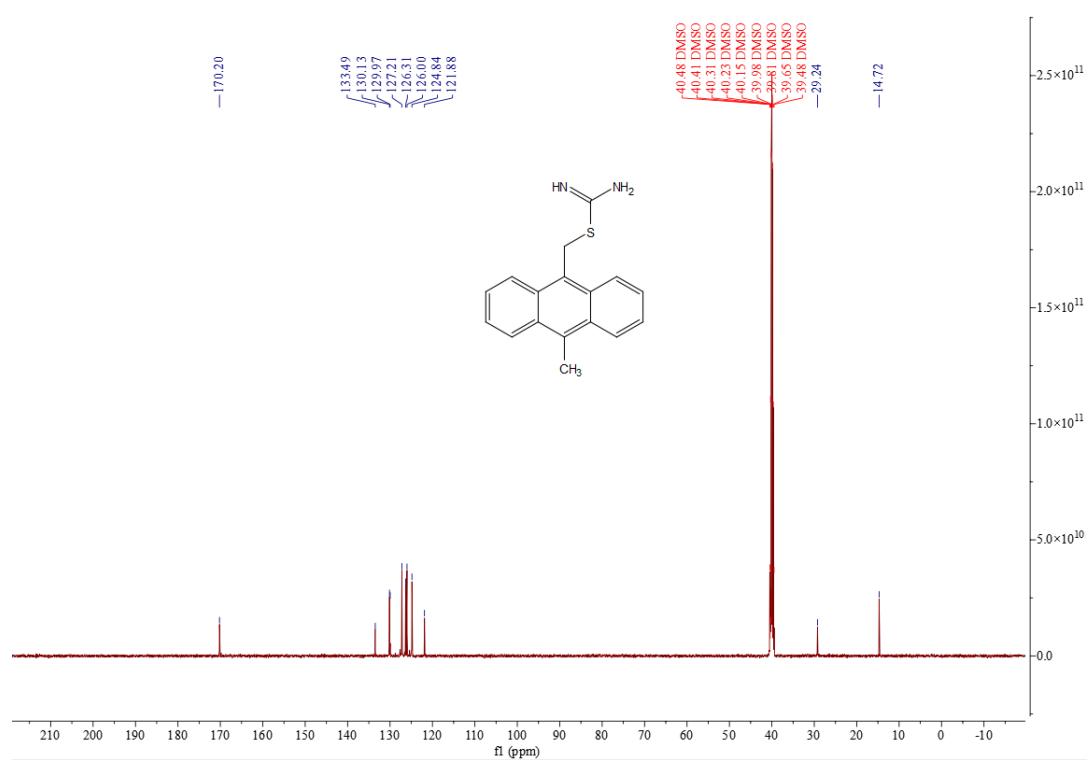

**Figure S2  $^{13}\text{C}$  NMR spectrum of XI-011**

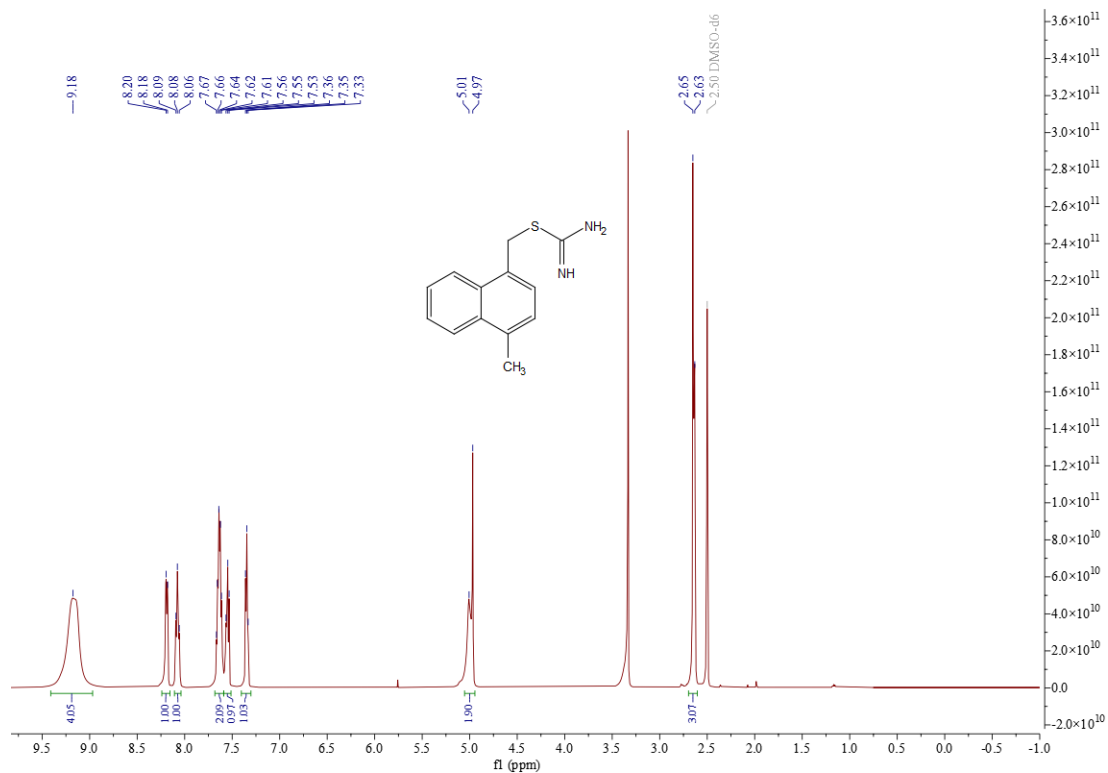

**Figure S3 <sup>1</sup>H NMR spectrum of 12a**

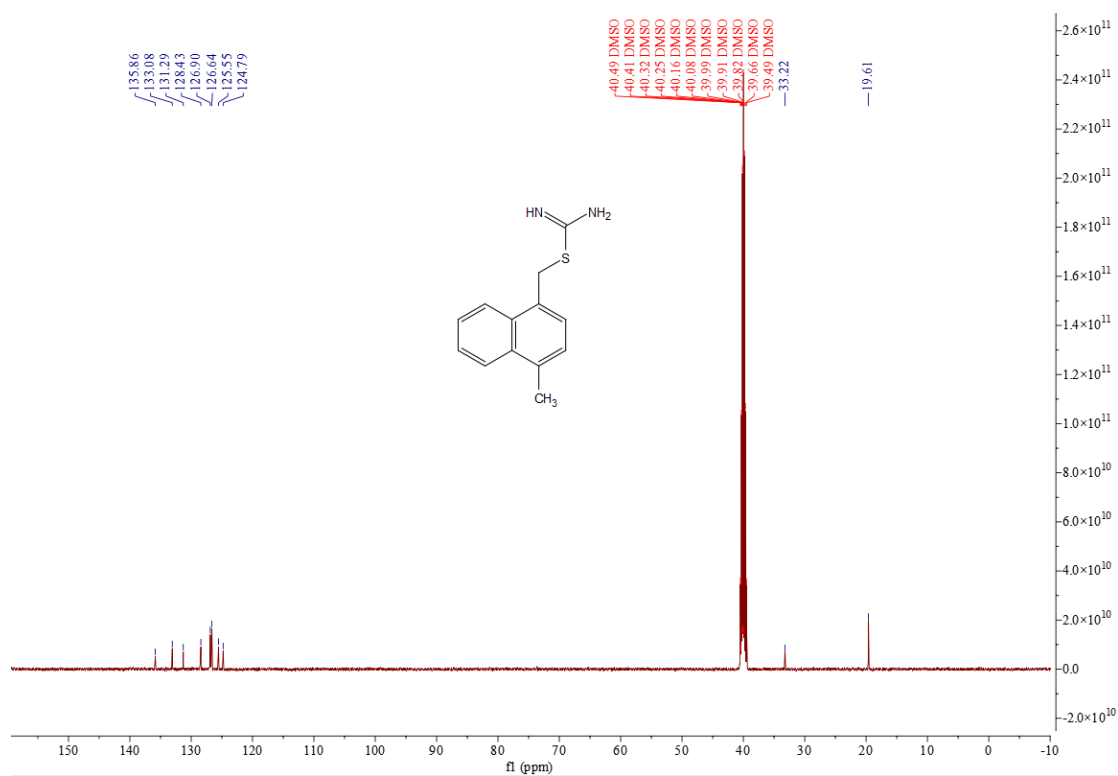

**Figure S4 <sup>13</sup>C NMR spectrum of 12a**

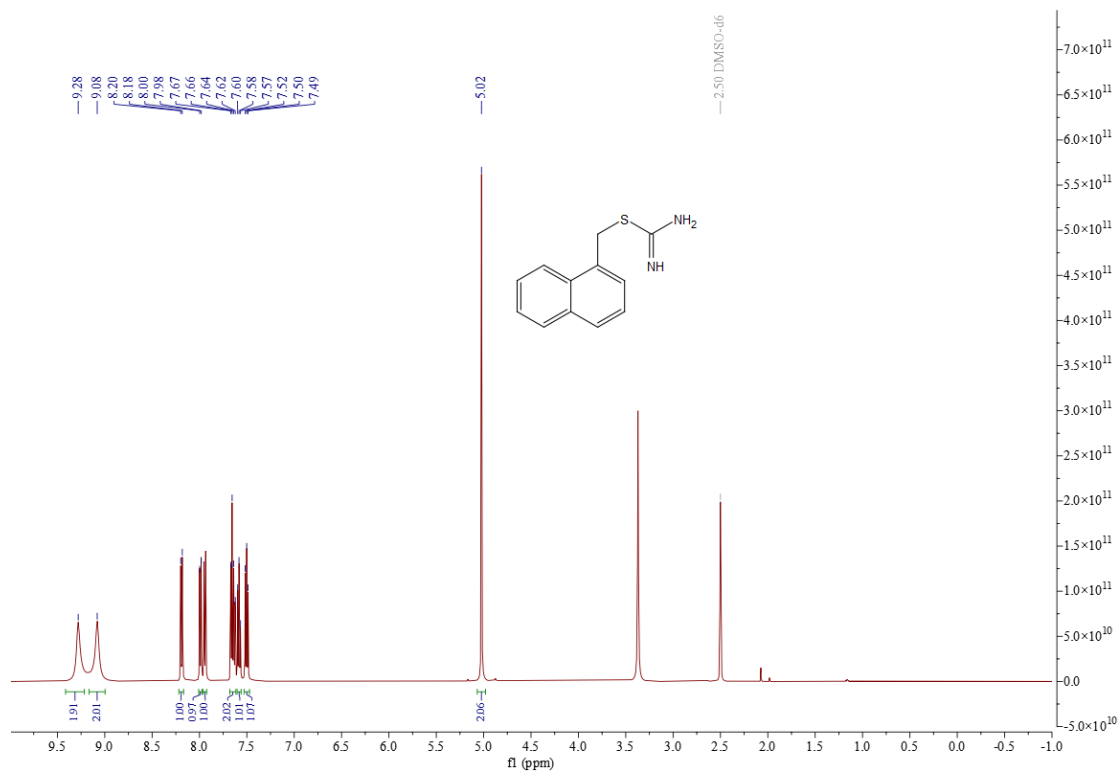

**Figure S5** <sup>1</sup>H NMR spectrum of **12b**

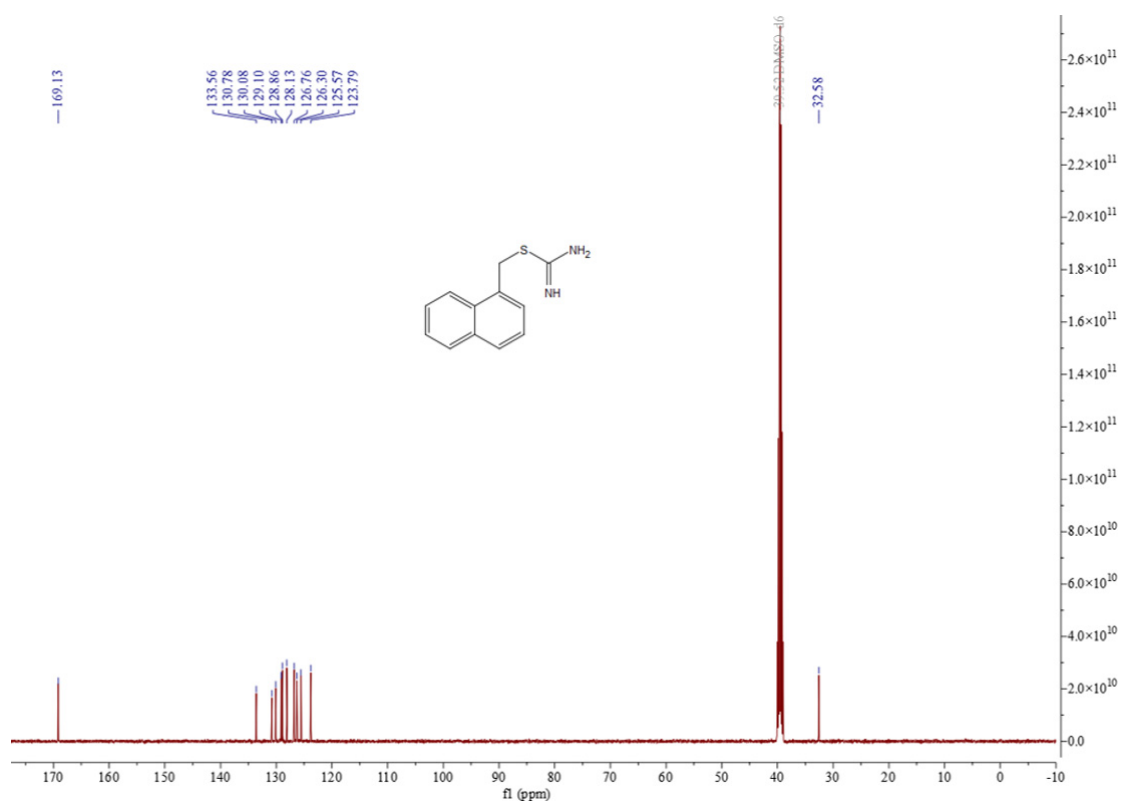

**Figure S6** <sup>13</sup>C NMR spectrum of **12b**

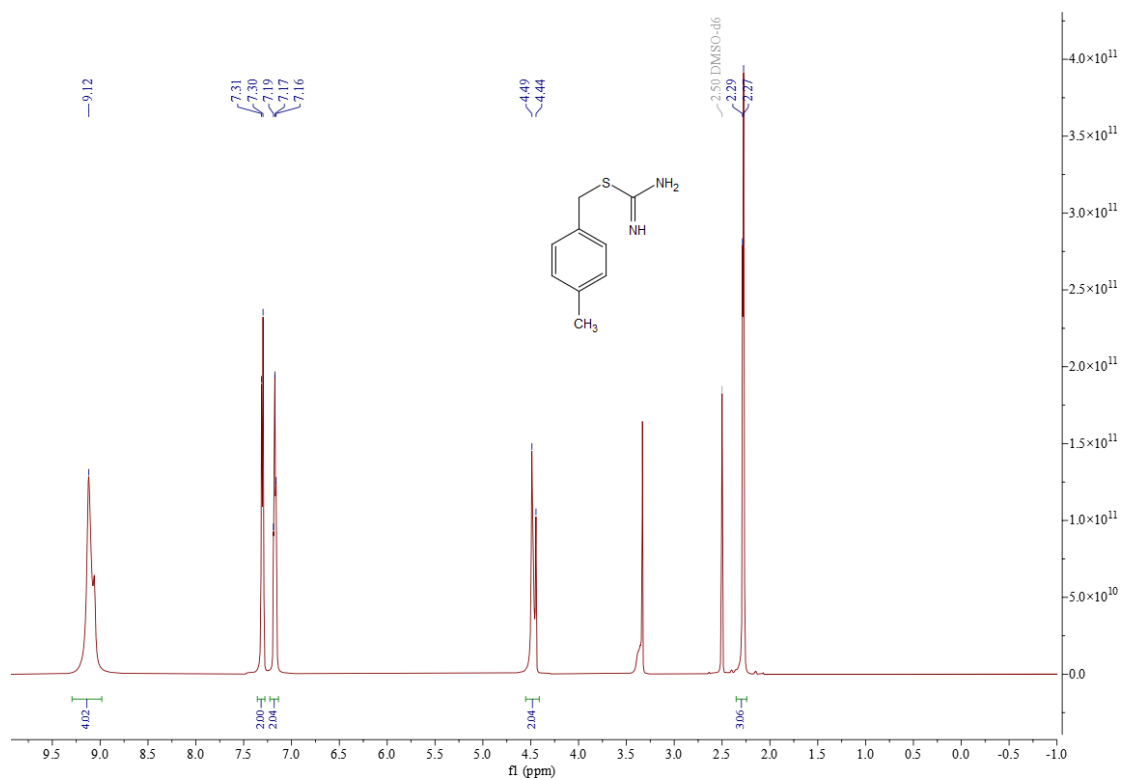

**Figure S7**  $^1\text{H}$  NMR spectrum of **12c**

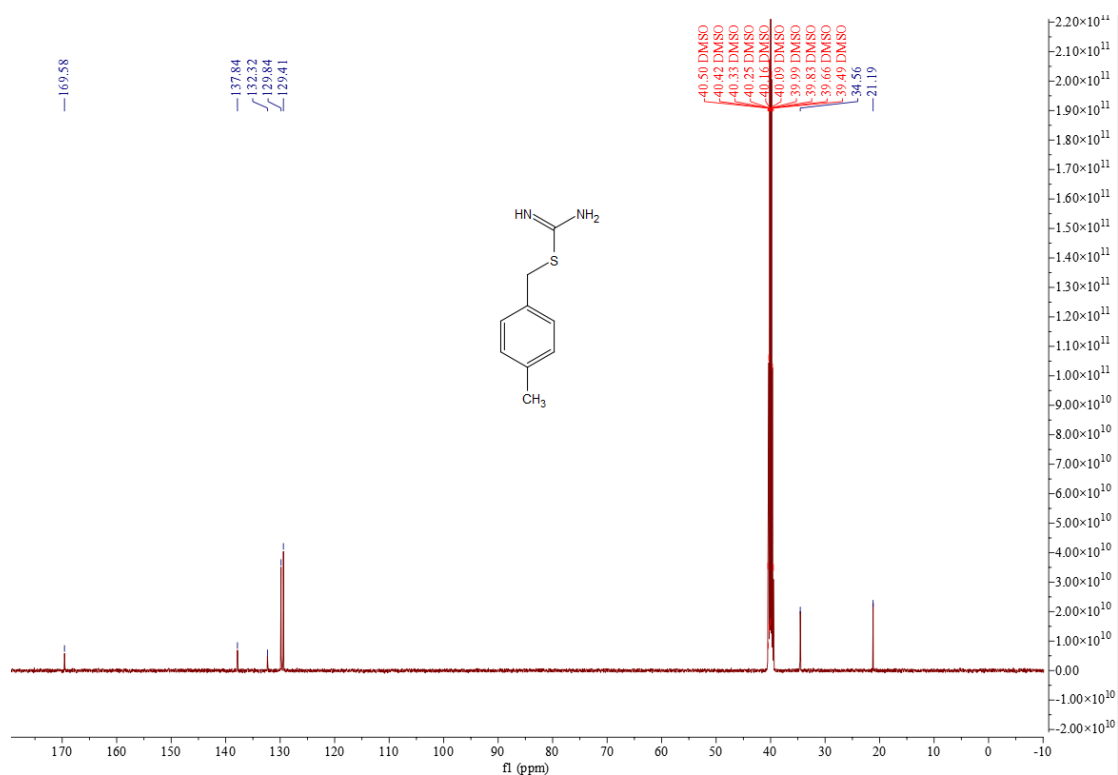

**Figure S8**  $^{13}\text{C}$  NMR spectrum of **12c**

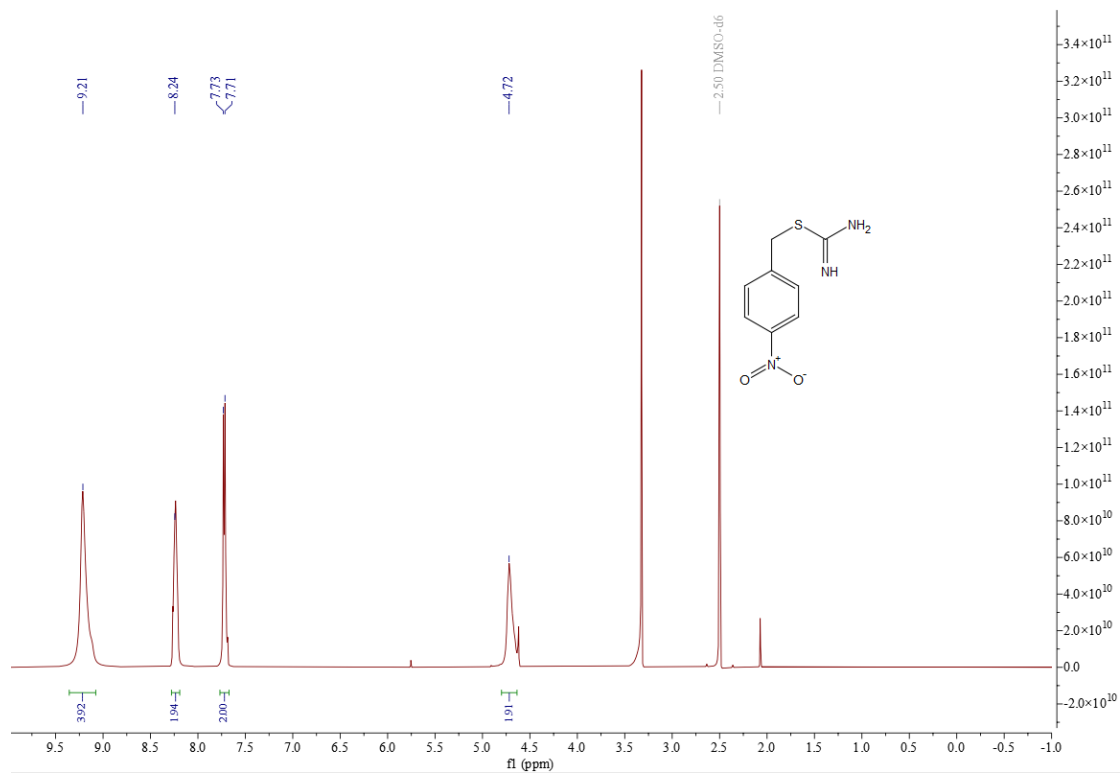

**Figure S9** <sup>1</sup>H NMR spectrum of **12d**

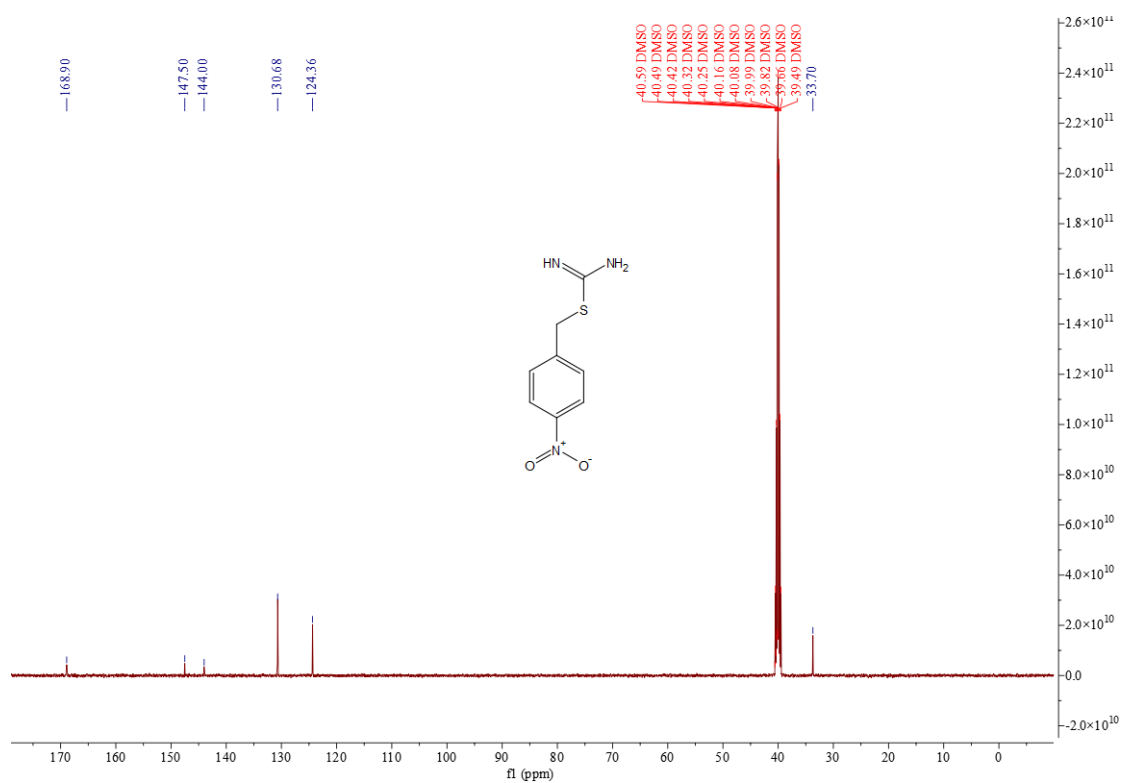

**Figure S10** <sup>13</sup>C NMR spectrum of **12d**

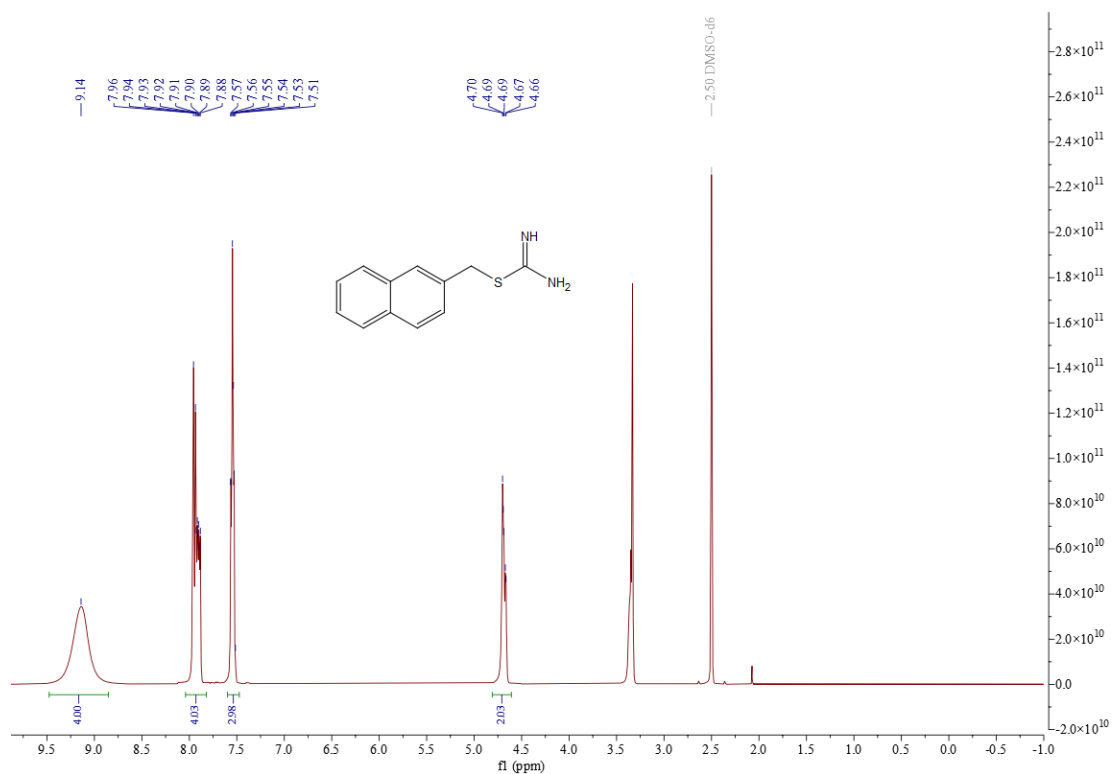

**Figure S11**  $^1\text{H}$  NMR spectrum of **12e**

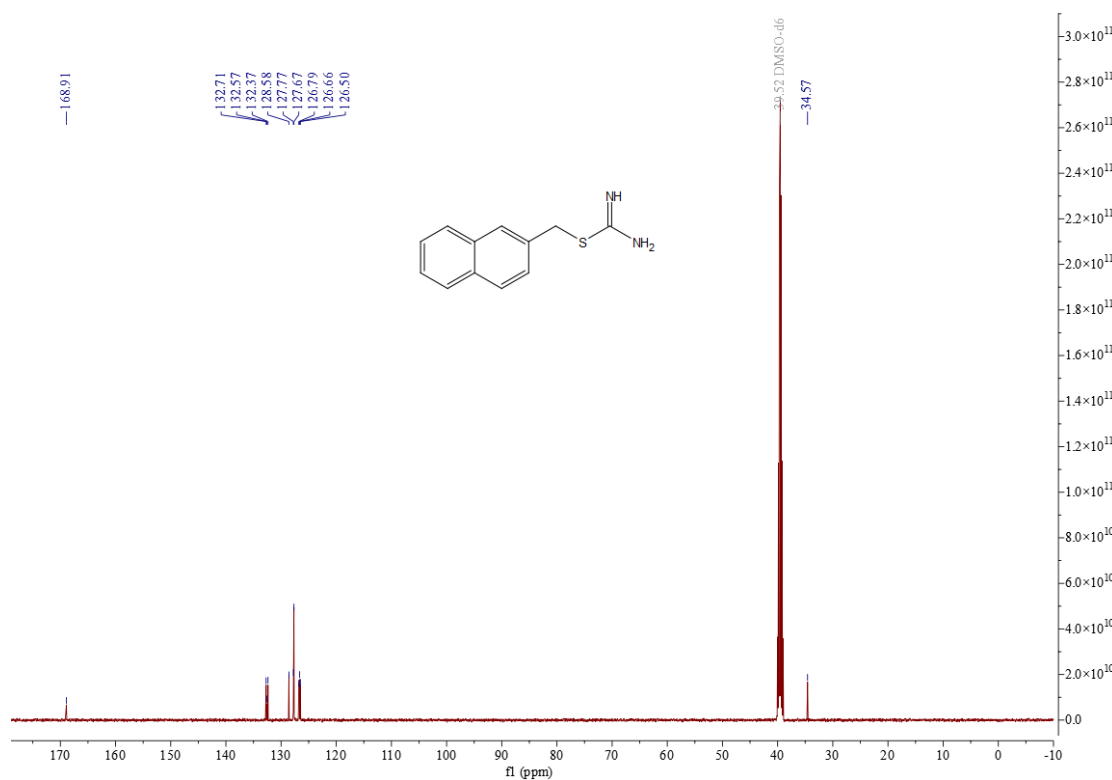

**Figure S12**  $^{13}\text{C}$  NMR spectrum of **12e**

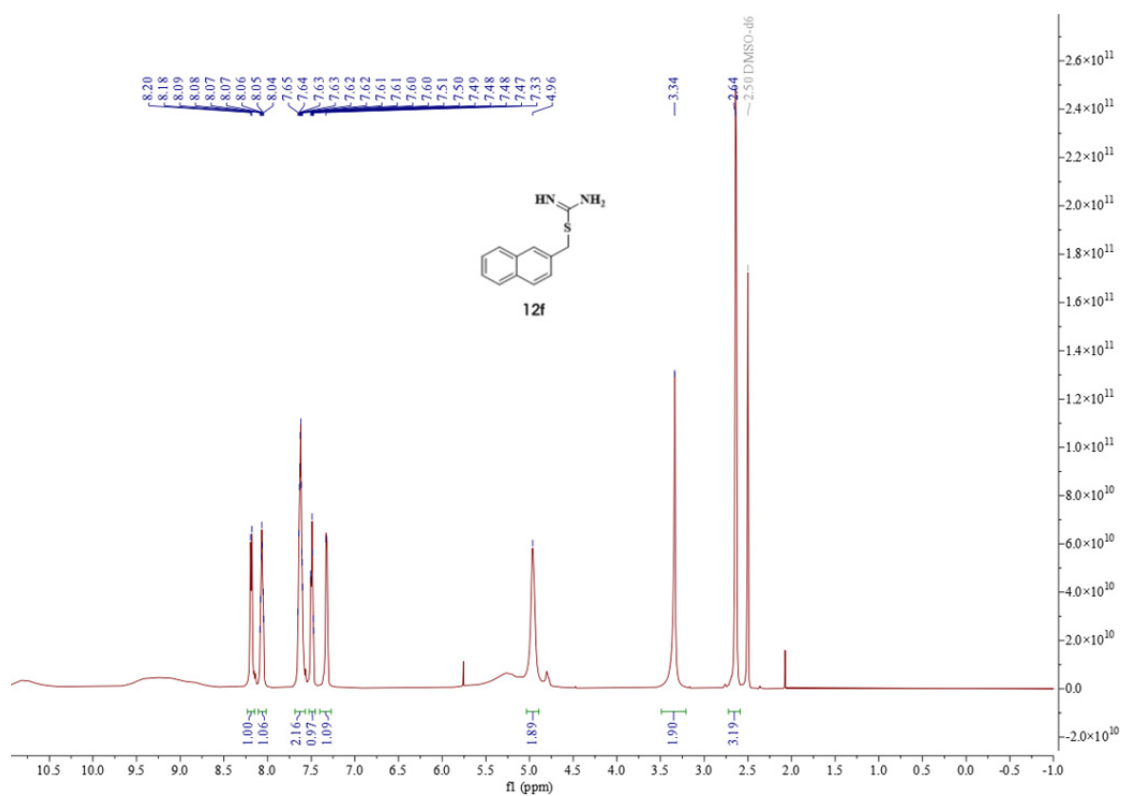

**Figure S13** <sup>1</sup>H NMR spectrum of **12f**

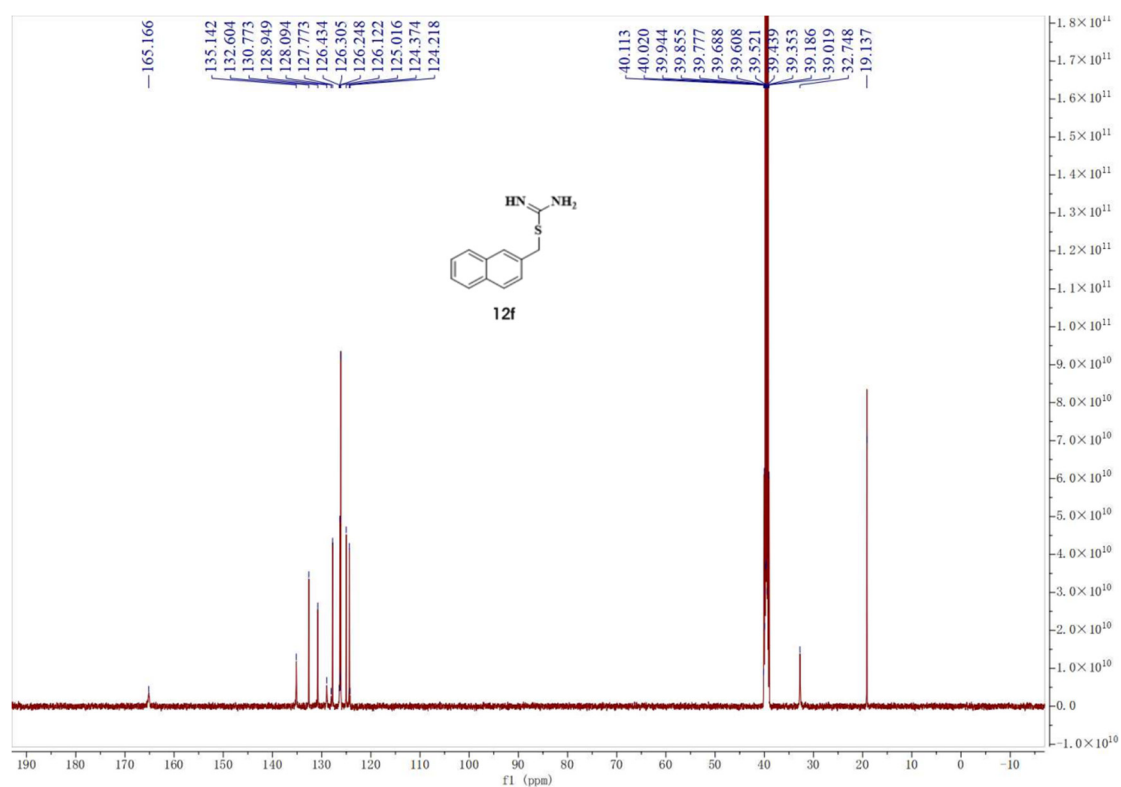

**Figure S14** <sup>13</sup>C NMR spectrum of **12f**

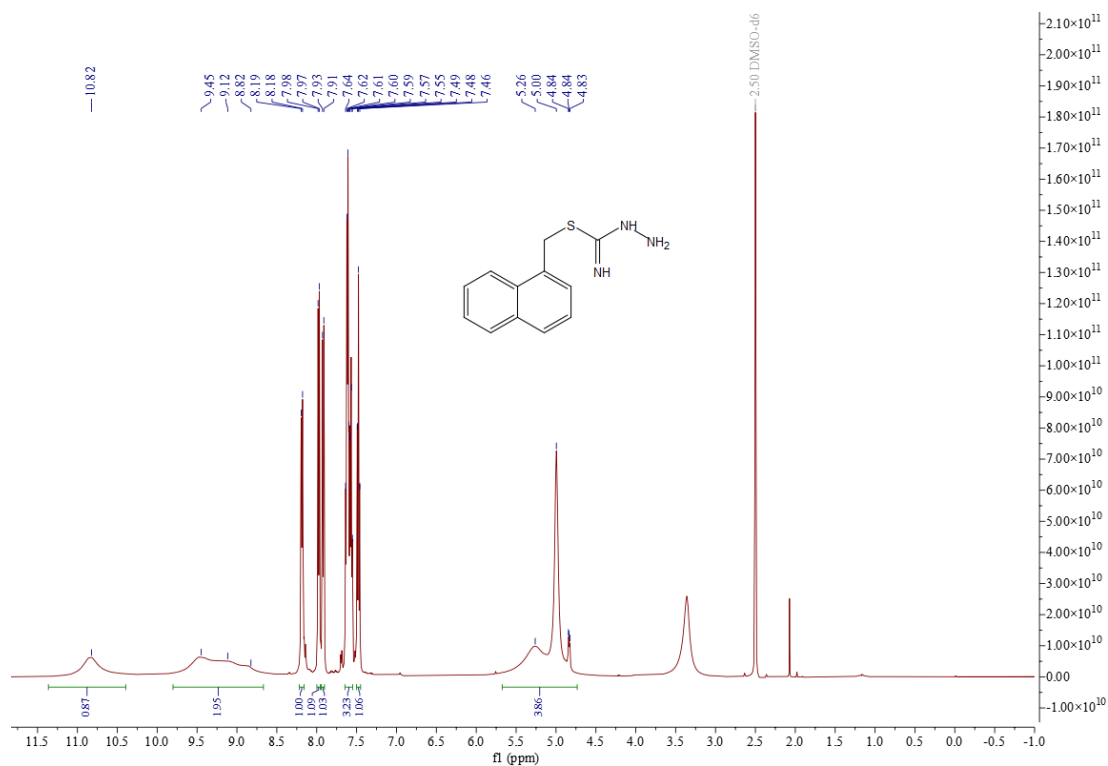

Figure S15 <sup>1</sup>H NMR spectrum of 12g

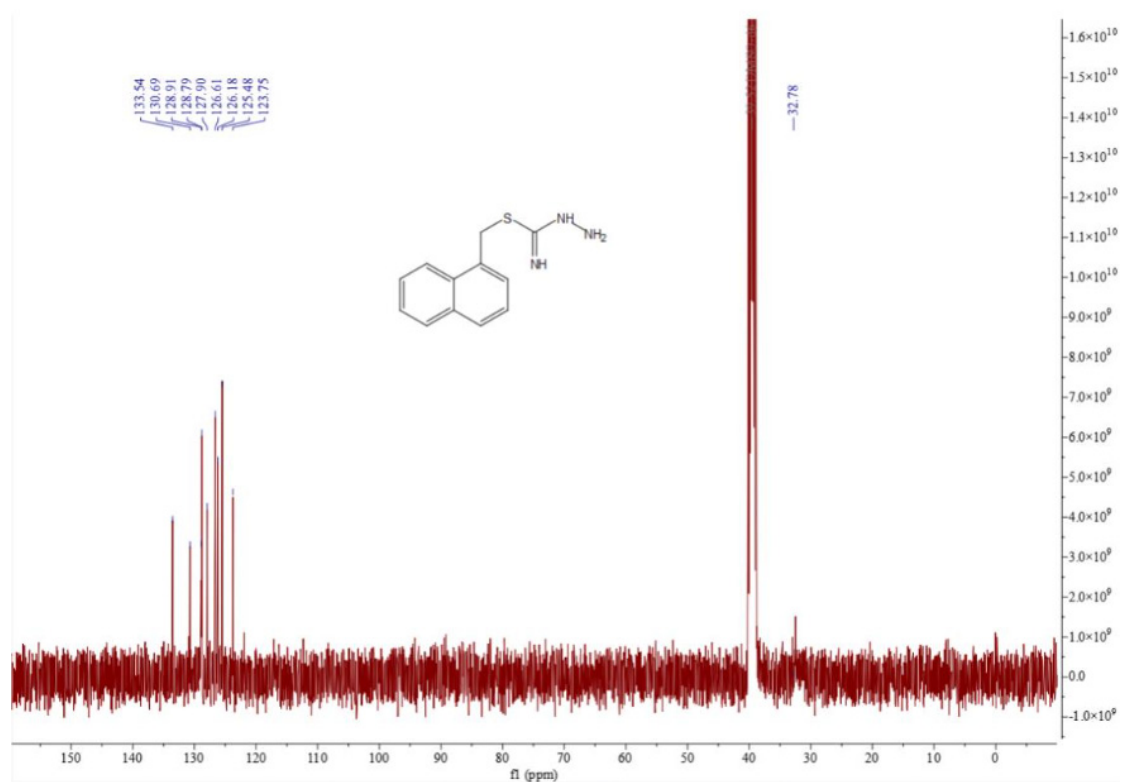

Figure S16 <sup>13</sup>C NMR spectrum of 12g



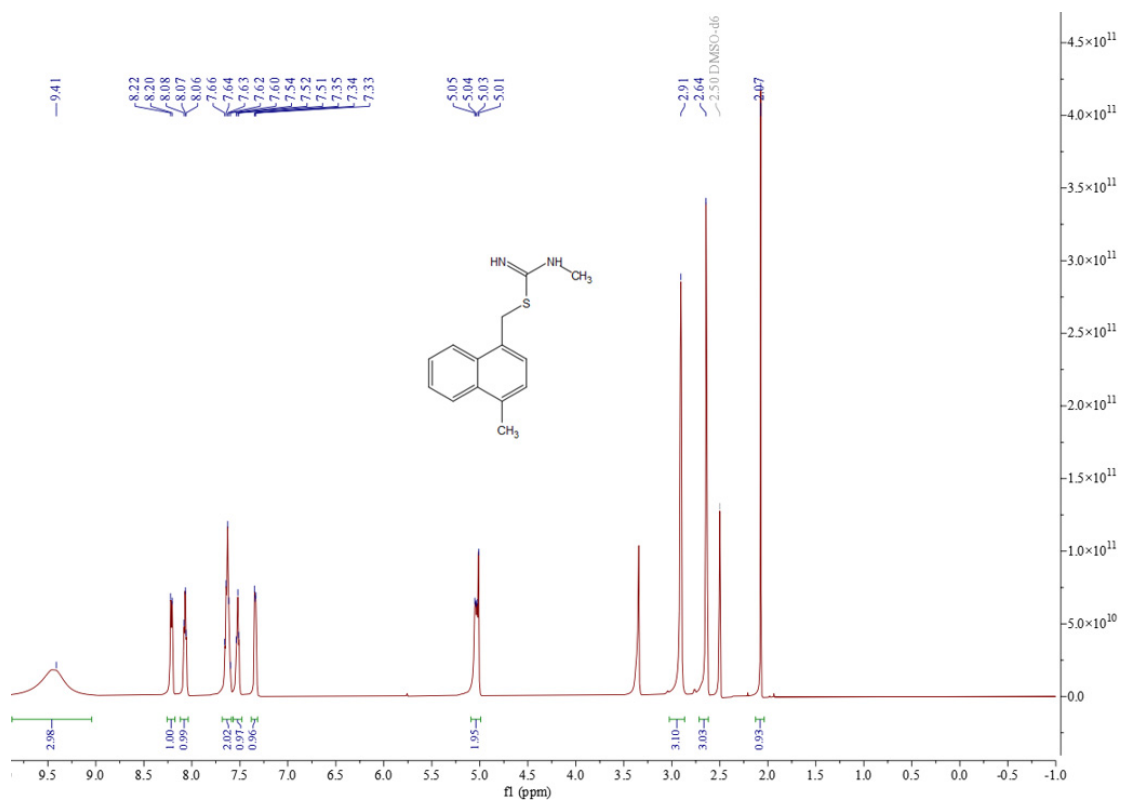

Figure S17 <sup>1</sup>H NMR spectrum of 12h

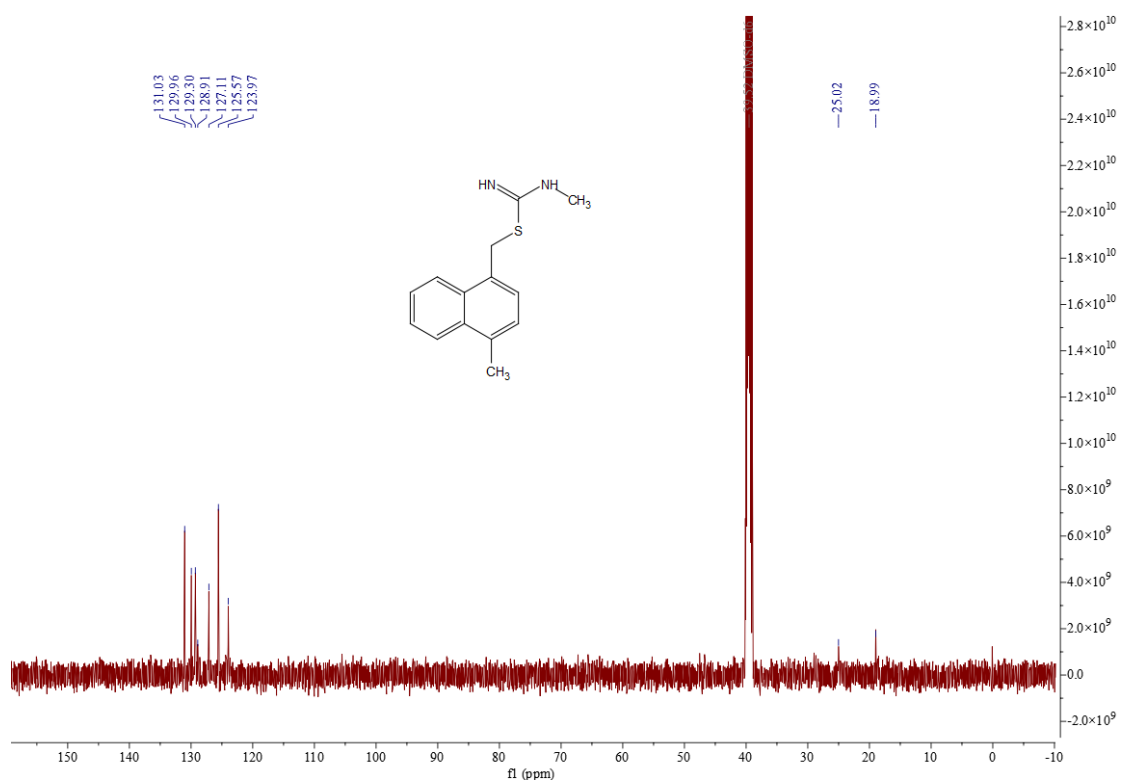

Figure S18 <sup>13</sup>C NMR spectrum of 12h

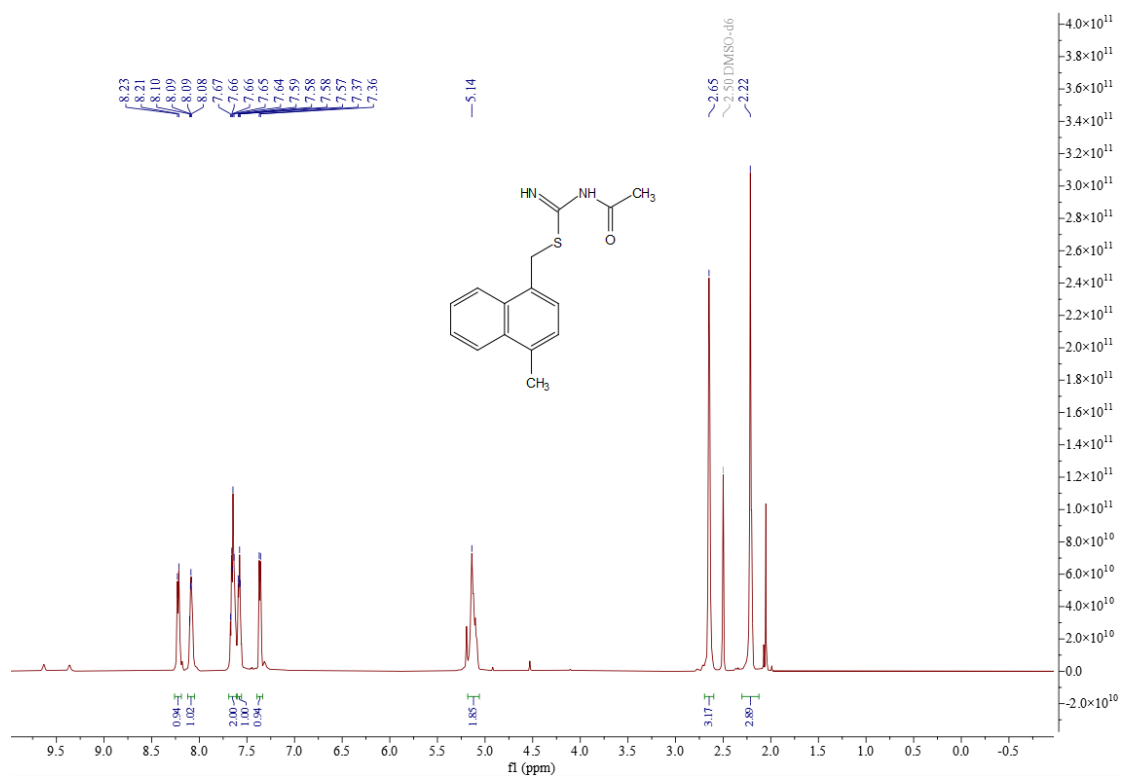

**Figure S19** <sup>1</sup>H NMR spectrum of **12i**

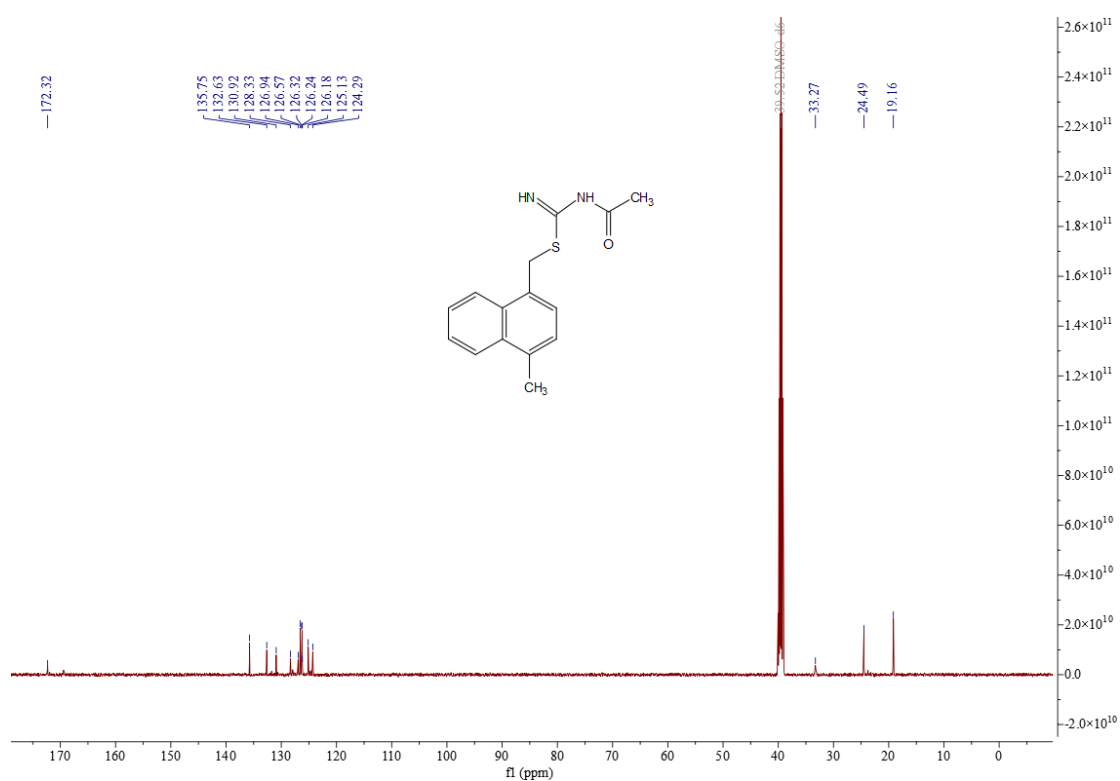

**Figure S20** <sup>13</sup>C NMR spectrum of **12i**

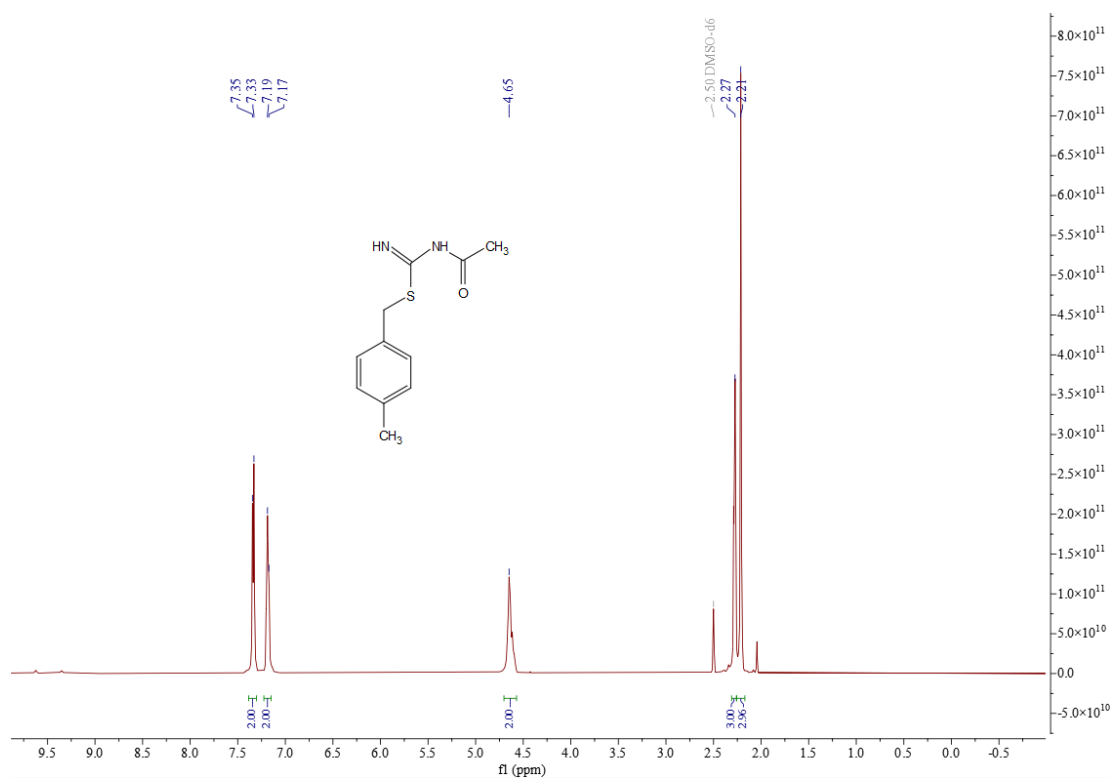

**Figure S21**  $^1\text{H}$  NMR spectrum of **12j**

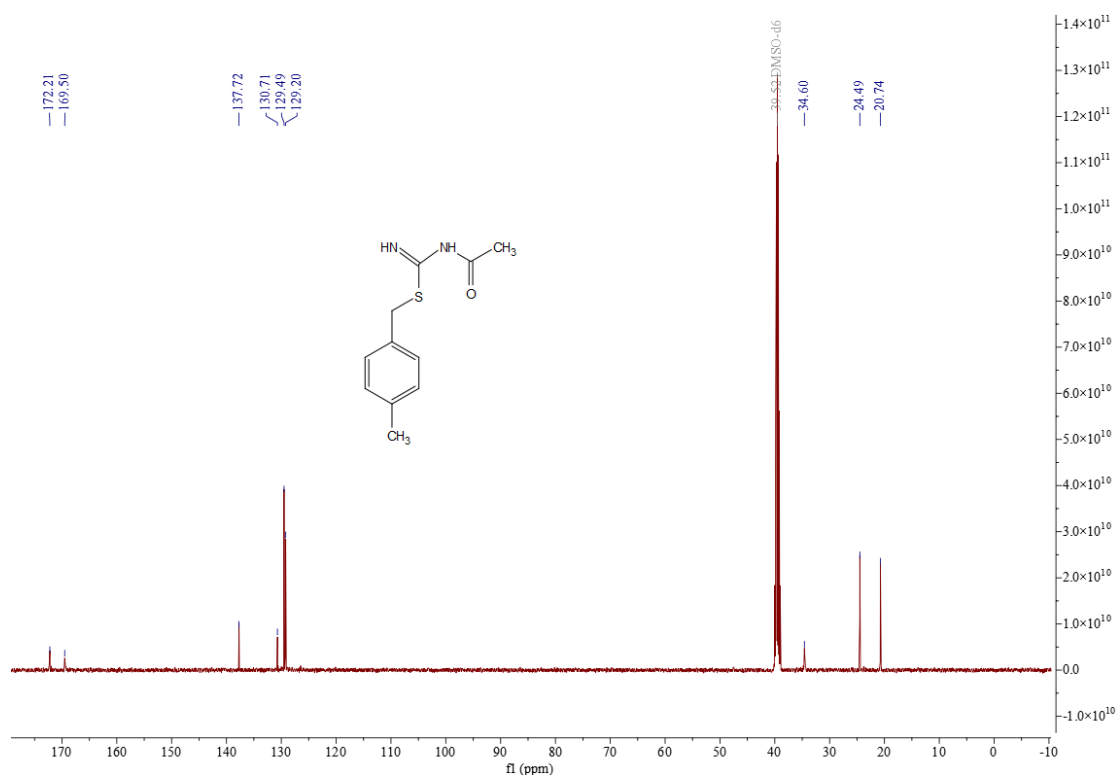

**Figure S22**  $^{13}\text{C}$  NMR spectrum of **12j**

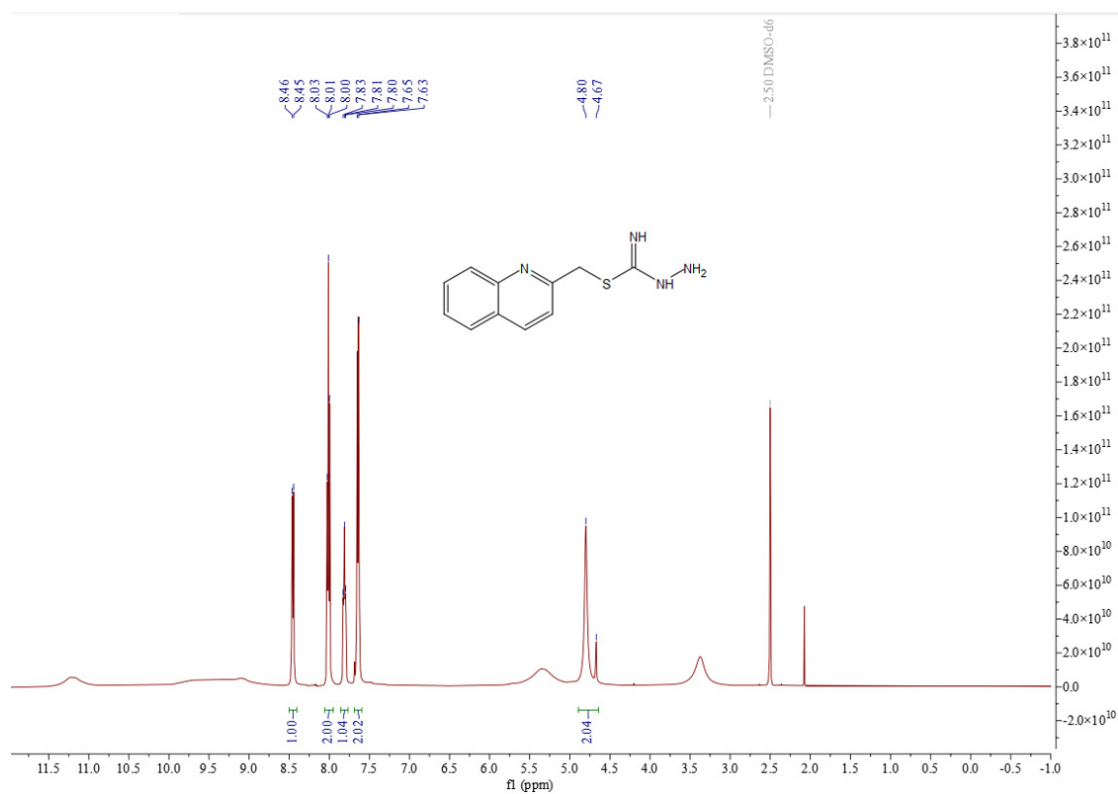

**Figure S23** <sup>1</sup>H NMR spectrum of **12k**

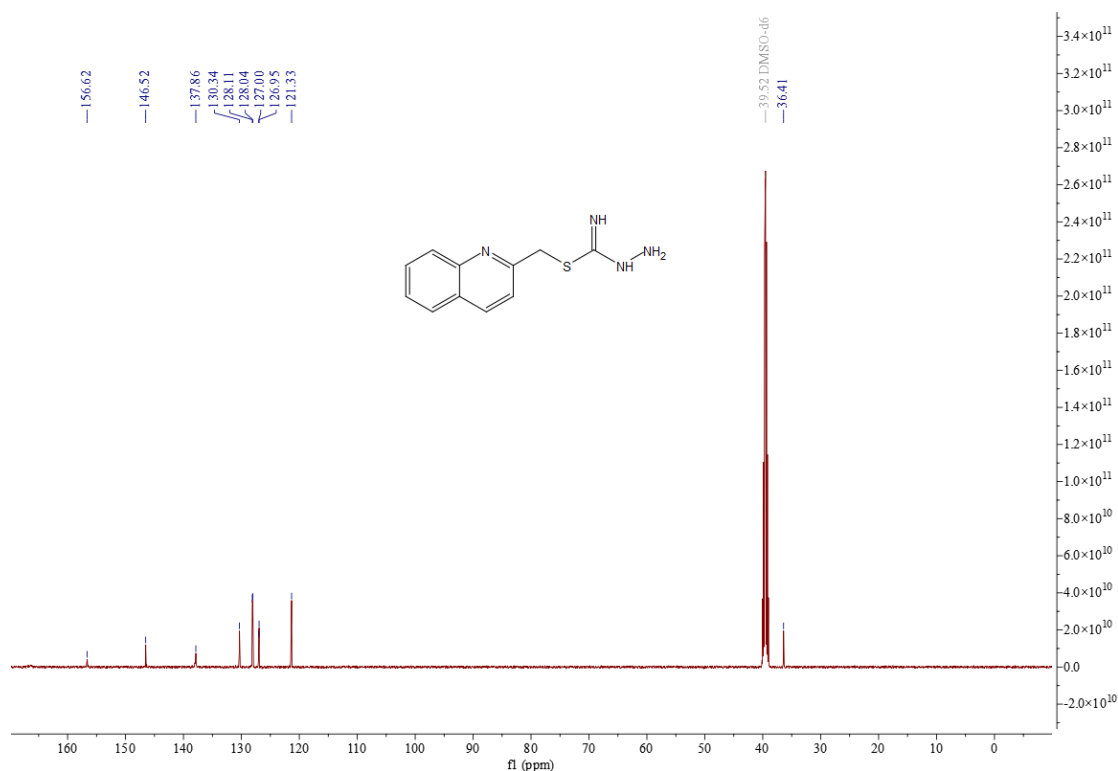

**Figure S24** <sup>13</sup>C NMR spectrum of **12k**

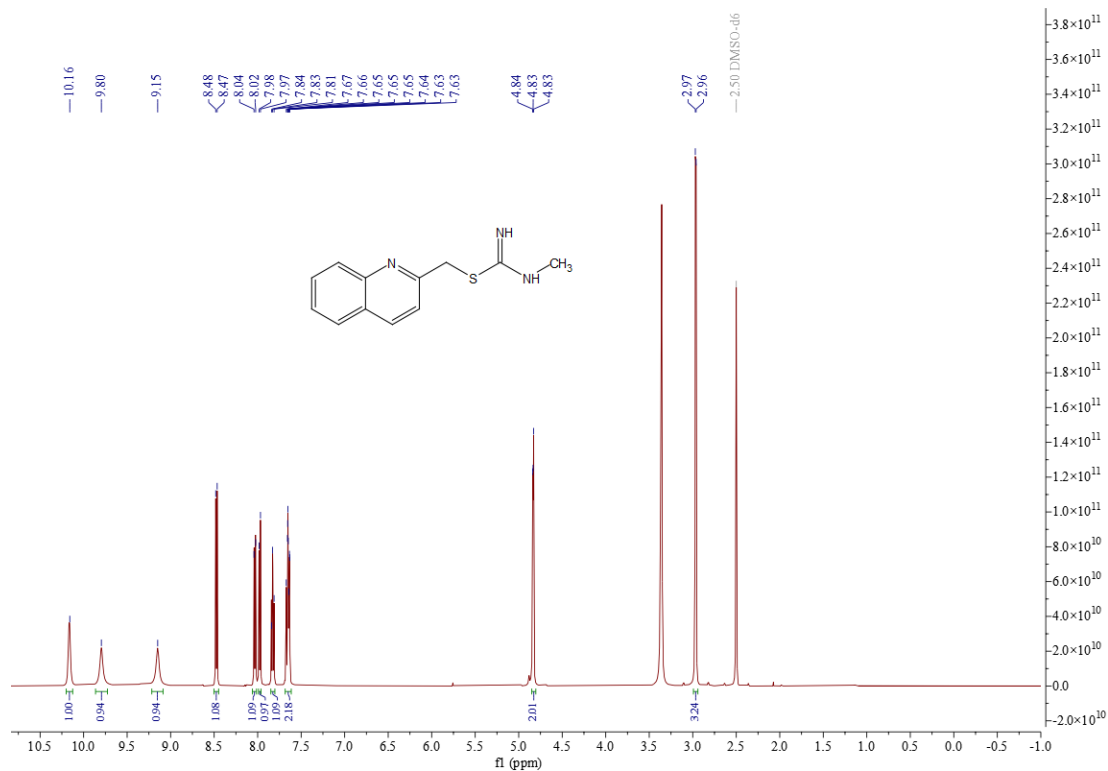

Figure S25  $^1\text{H}$  NMR spectrum of 121

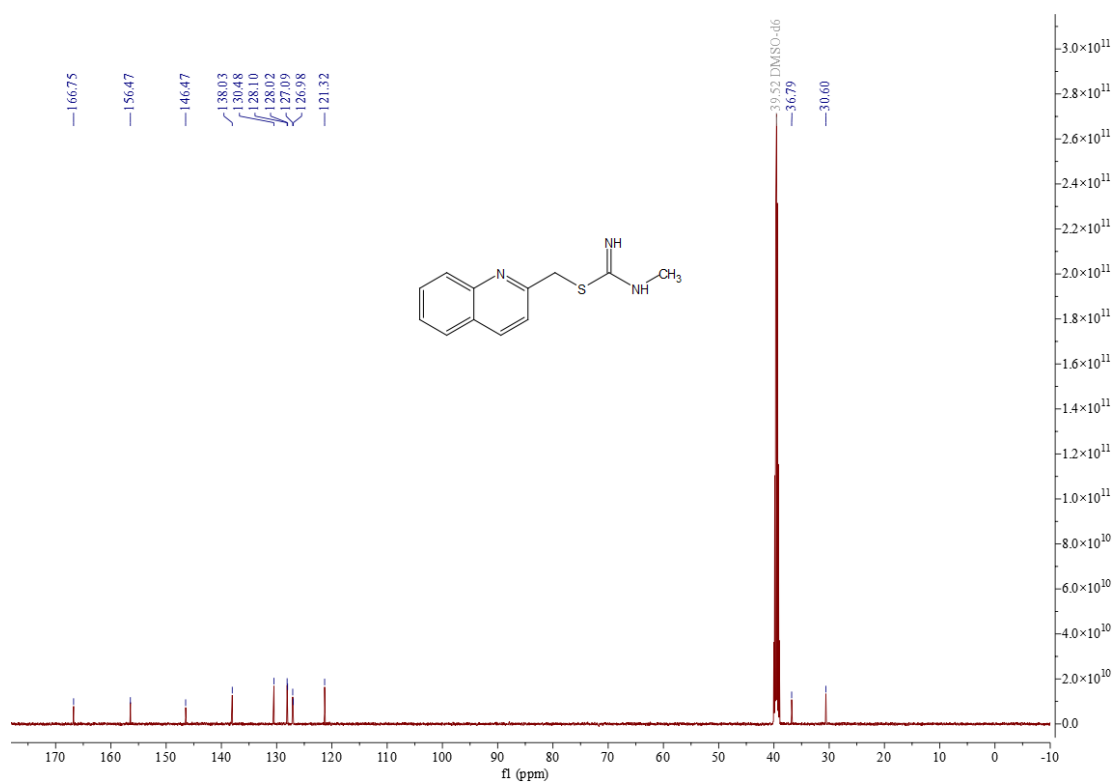

Figure S26  $^{13}\text{C}$  NMR spectrum of 121

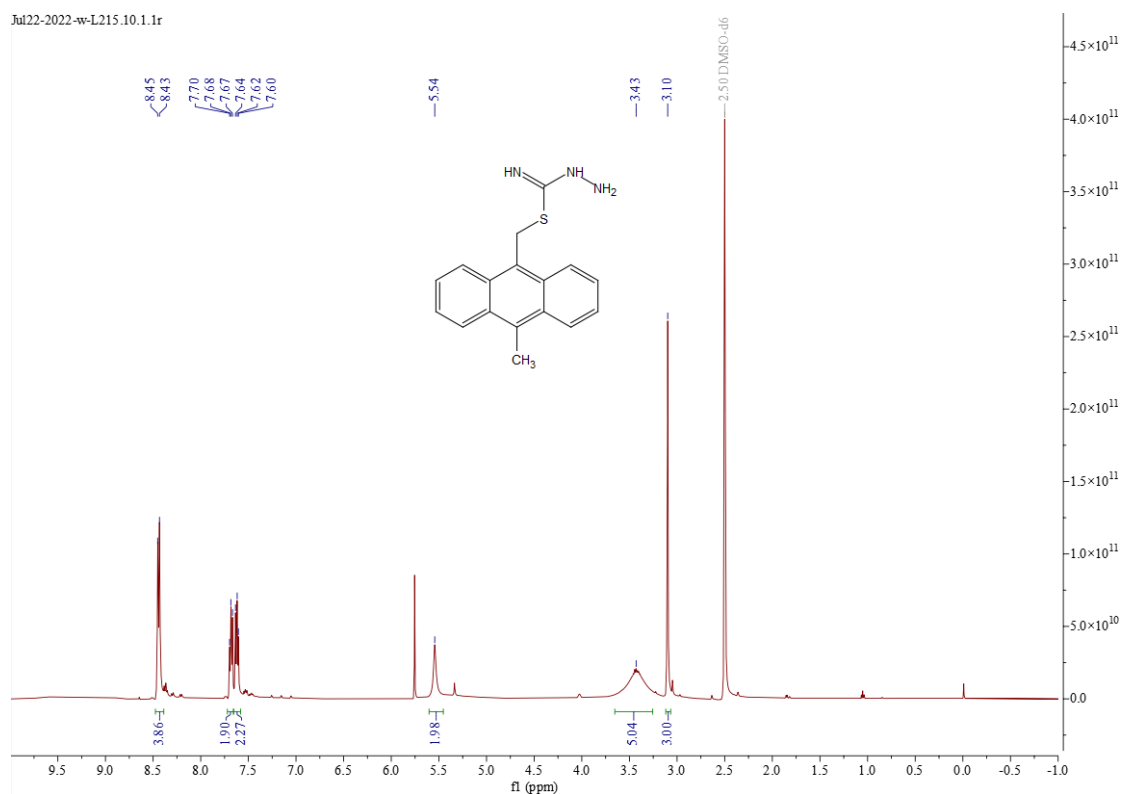

**Figure S27**  $^1\text{H}$  NMR spectrum of **13a**

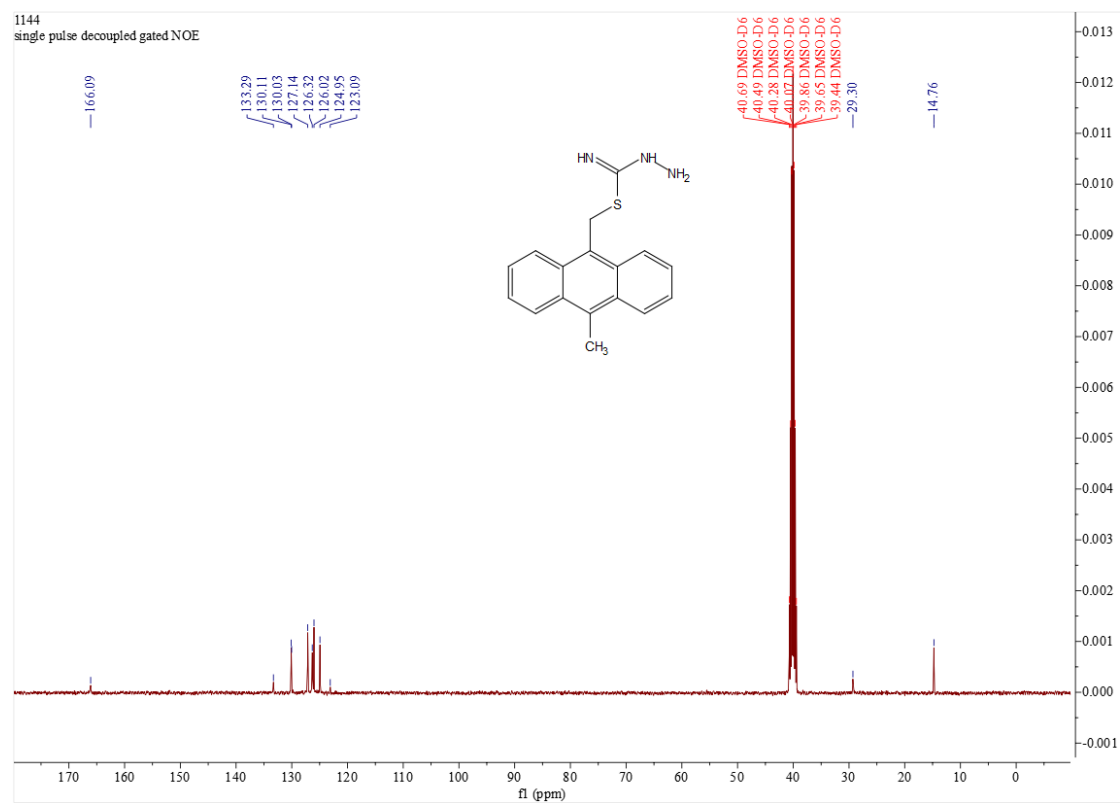

**Figure S28**  $^{13}\text{C}$  NMR spectrum of **13a**

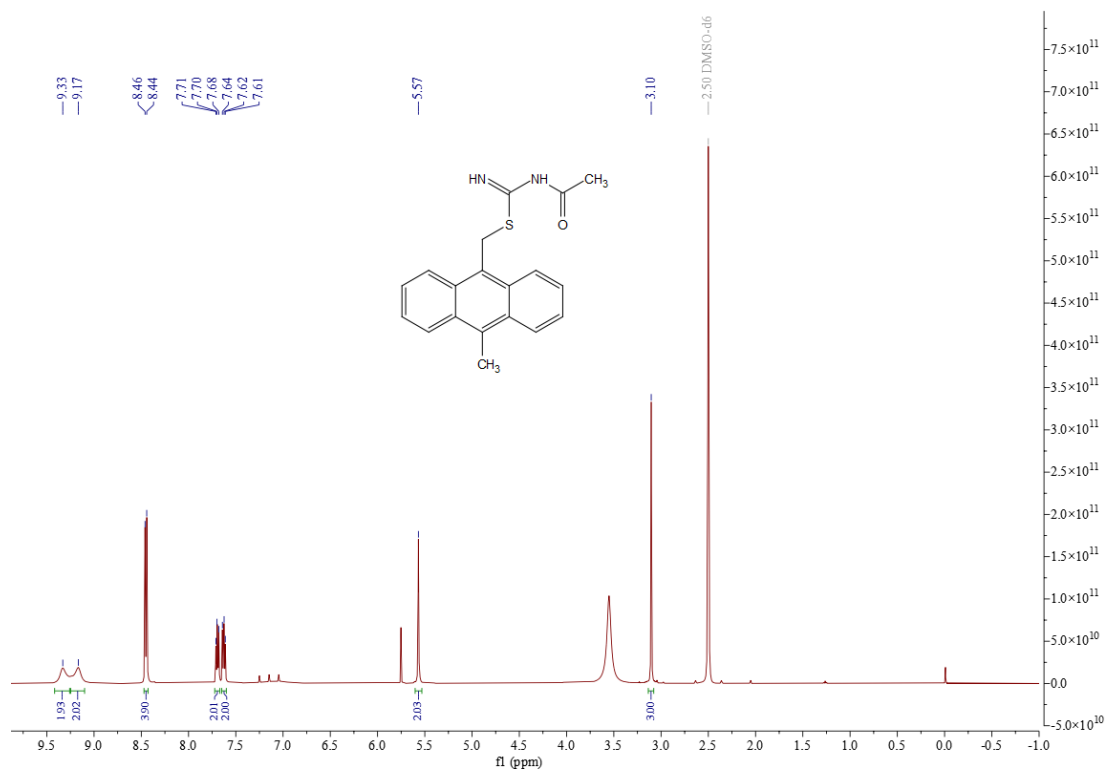

**Figure S29** <sup>1</sup>H NMR spectrum of **13b**

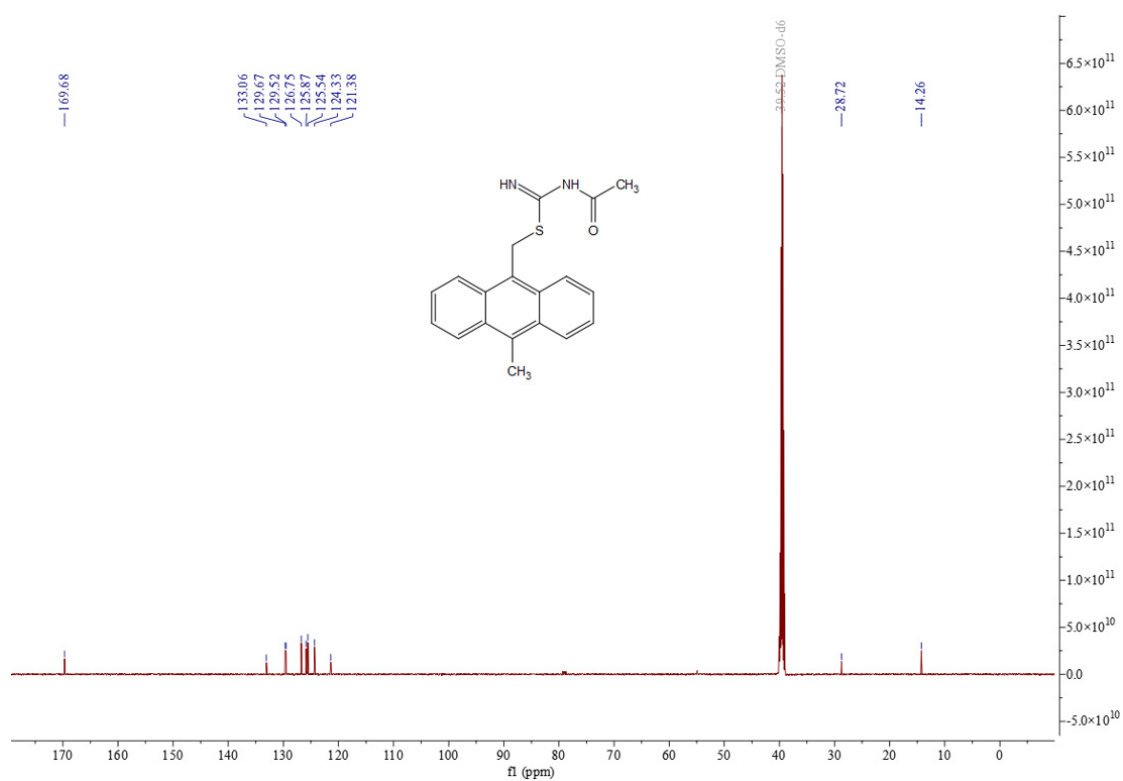

**Figure S30** <sup>13</sup>C NMR spectrum of **13b**

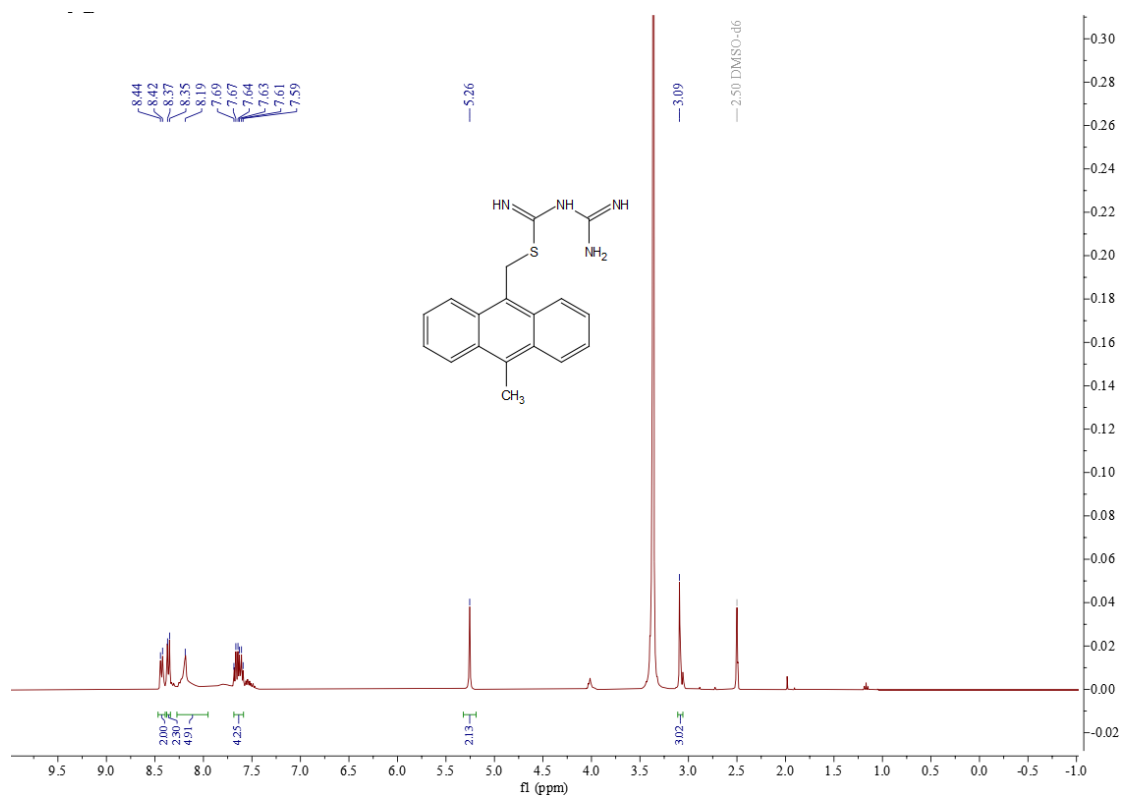

**Figure S31** <sup>1</sup>H NMR spectrum of **13c**

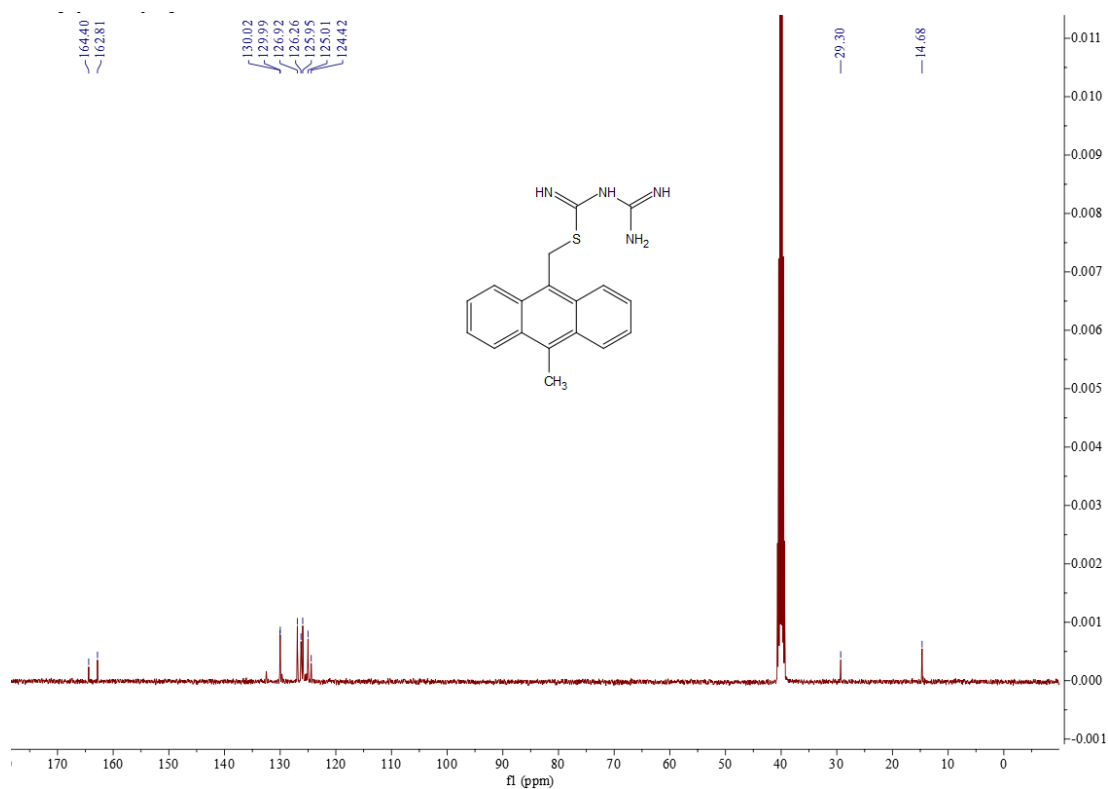

**Figure S32** <sup>13</sup>C NMR spectrum of **13c**



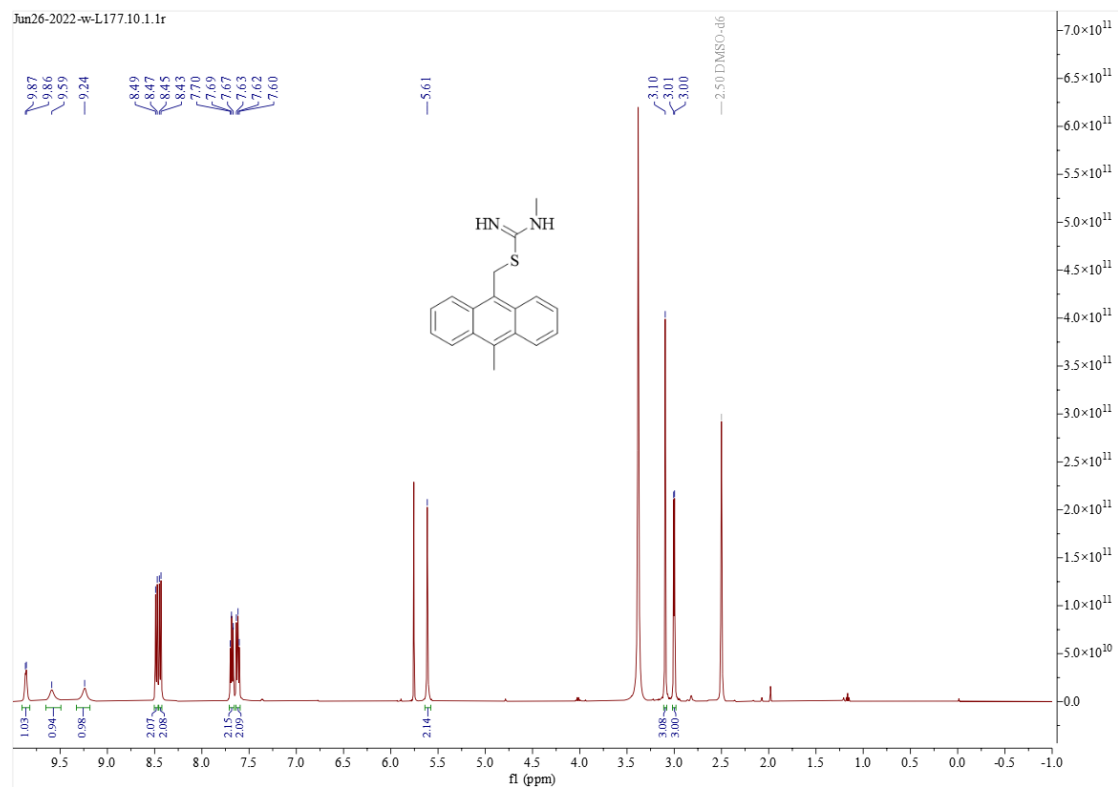

**Figure S33**  $^1\text{H}$  NMR spectrum of **13d**

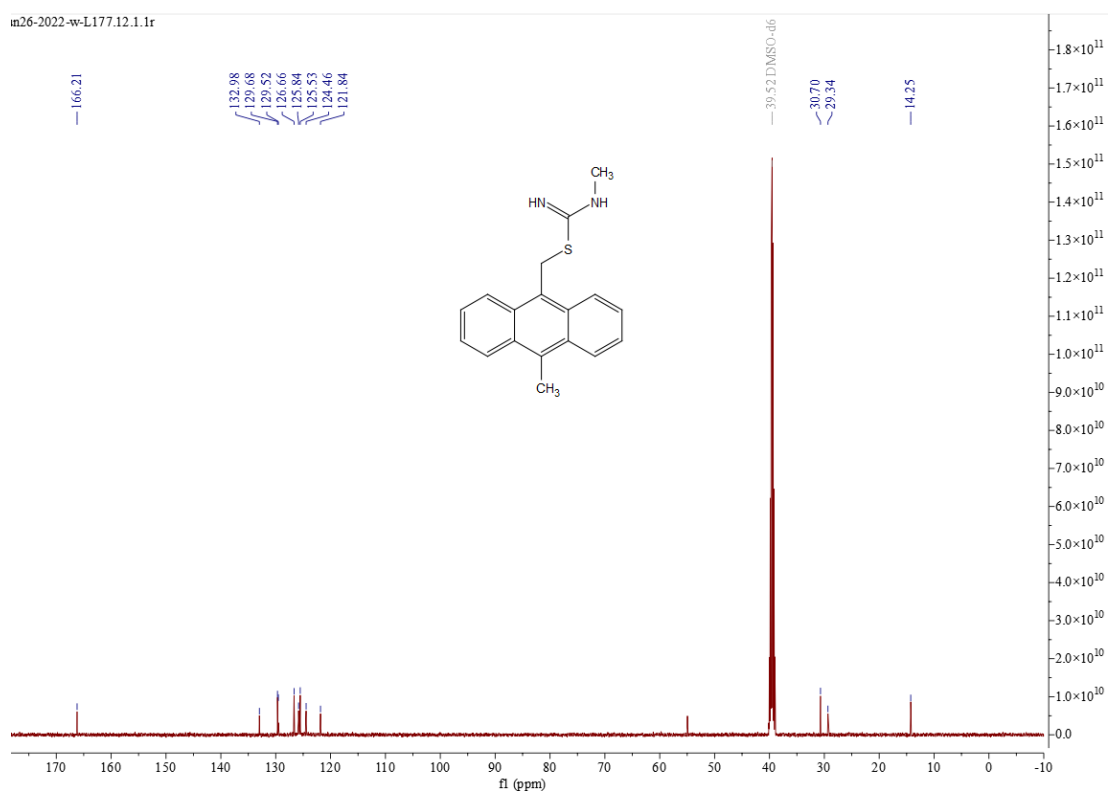

**Figure S34**  $^{13}\text{C}$  NMR spectrum of **13d**

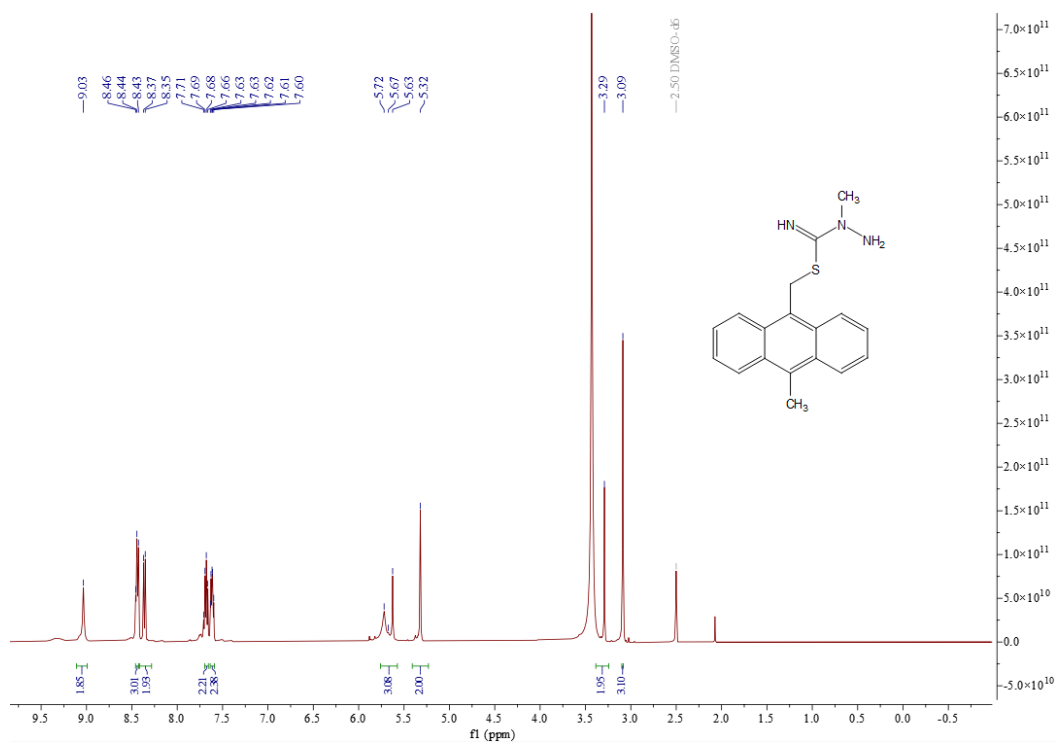

**Figure S35** <sup>1</sup>H NMR spectrum of **13e**

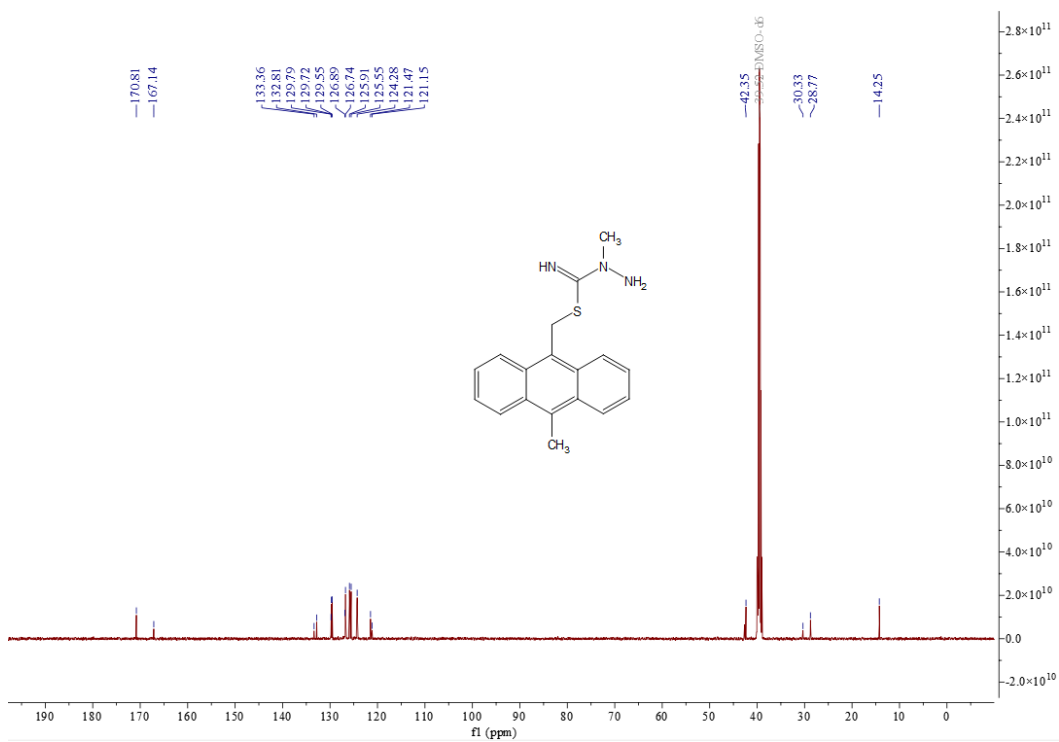

**Figure S36** <sup>13</sup>C NMR spectrum of **13e**

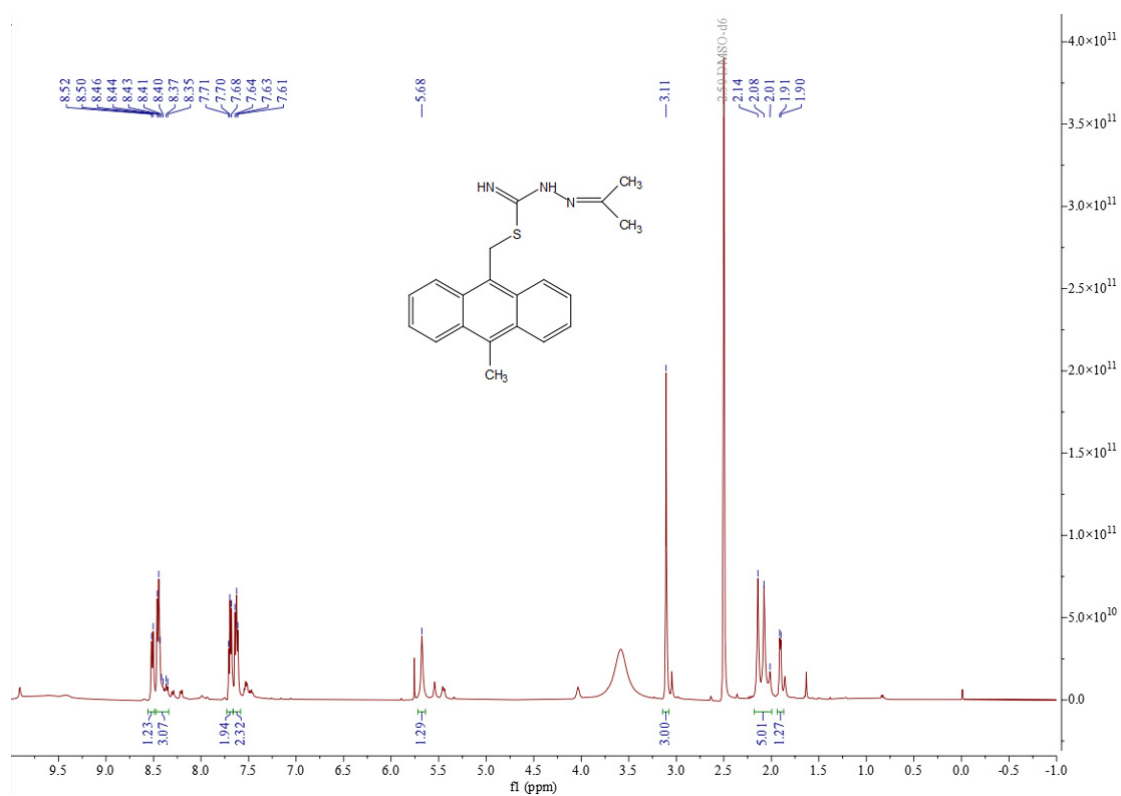

Figure S37 <sup>1</sup>H NMR spectrum of 13f

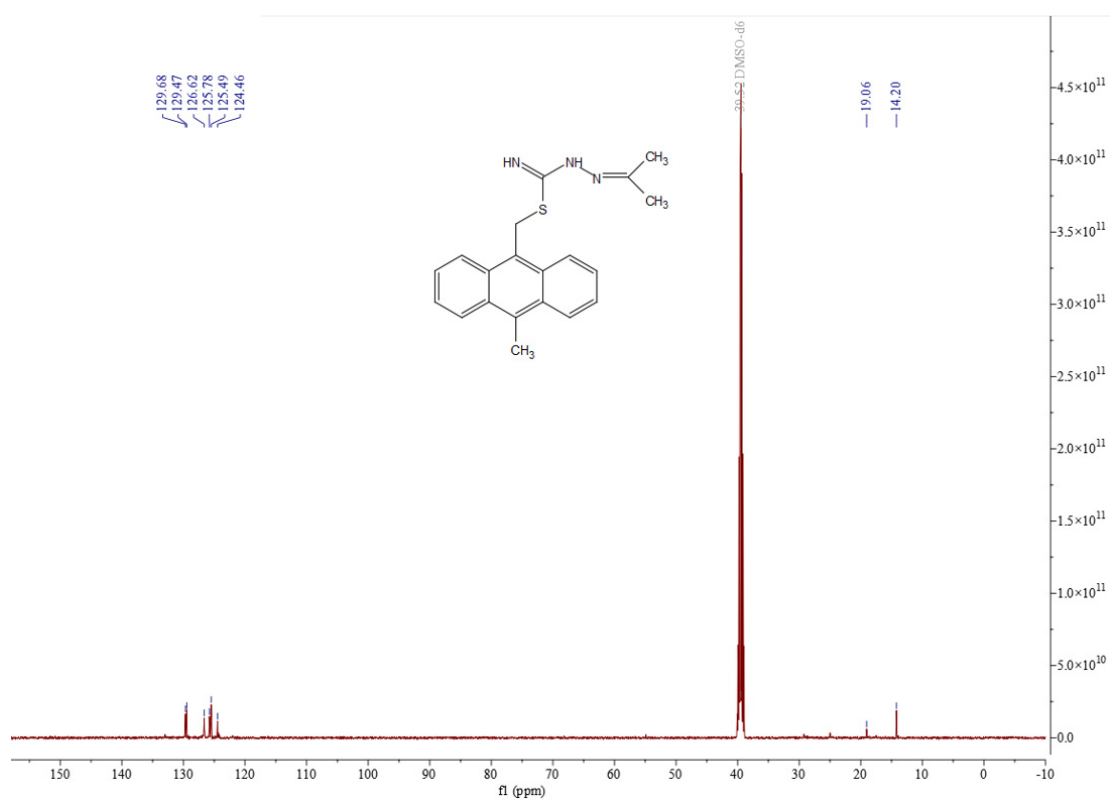

Figure S38 <sup>13</sup>C NMR spectrum of 13f

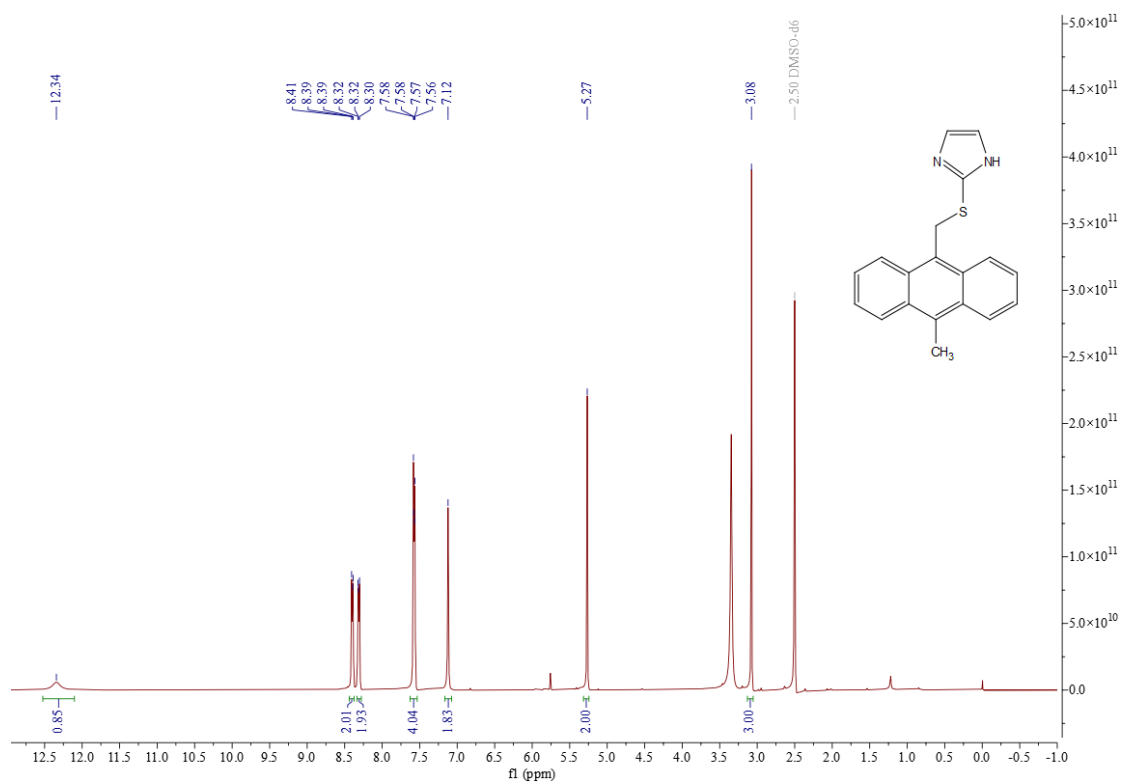

**Figure S39**  $^1\text{H}$  NMR spectrum of **13g**

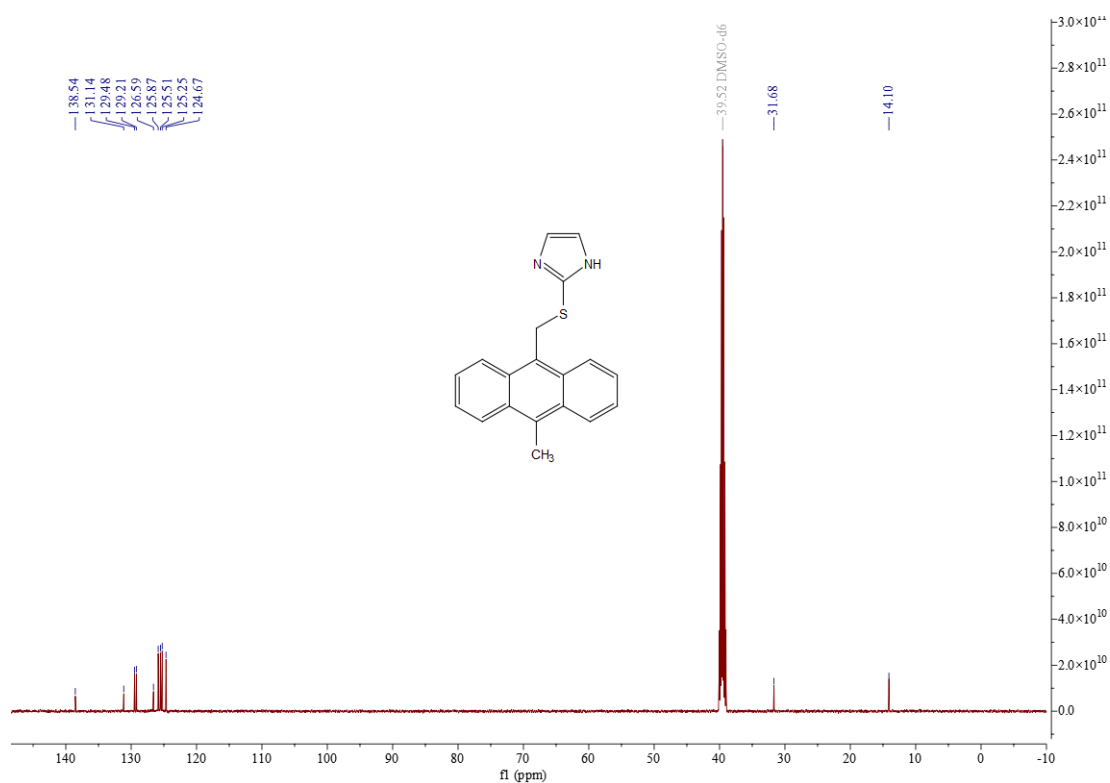

**Figure S40**  $^{13}\text{C}$  NMR spectrum of **13g**

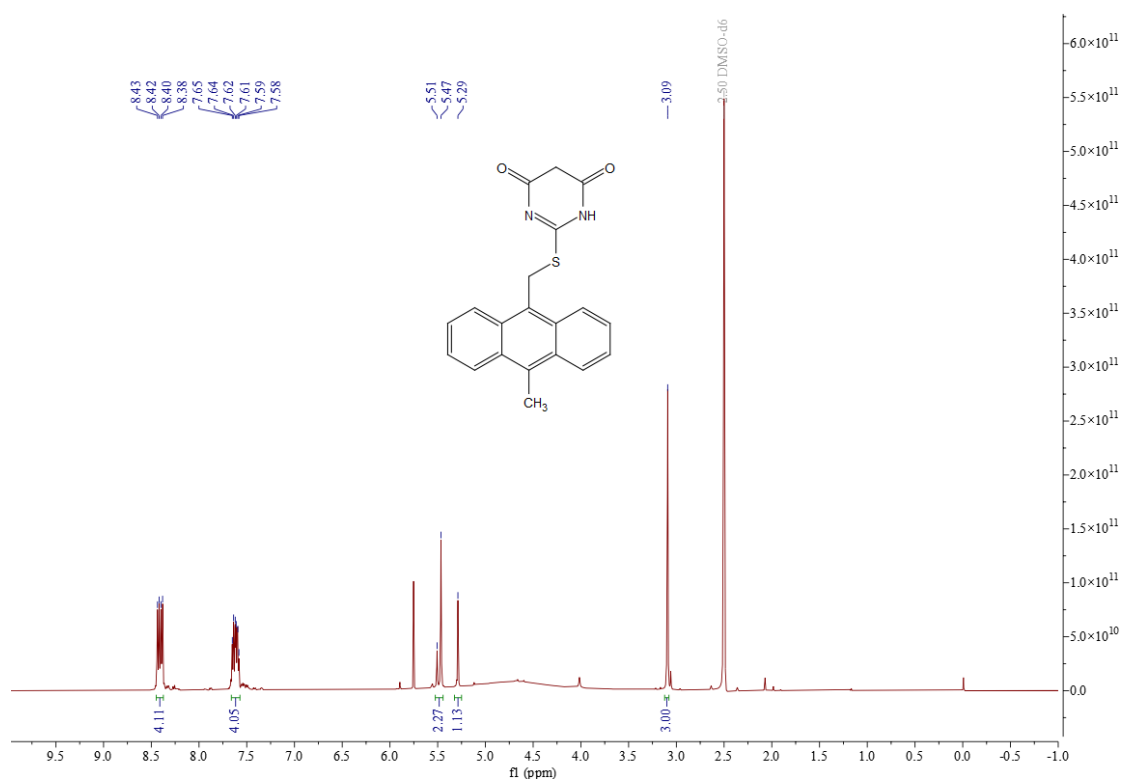

**Figure S41** <sup>1</sup>H NMR spectrum of **13h**

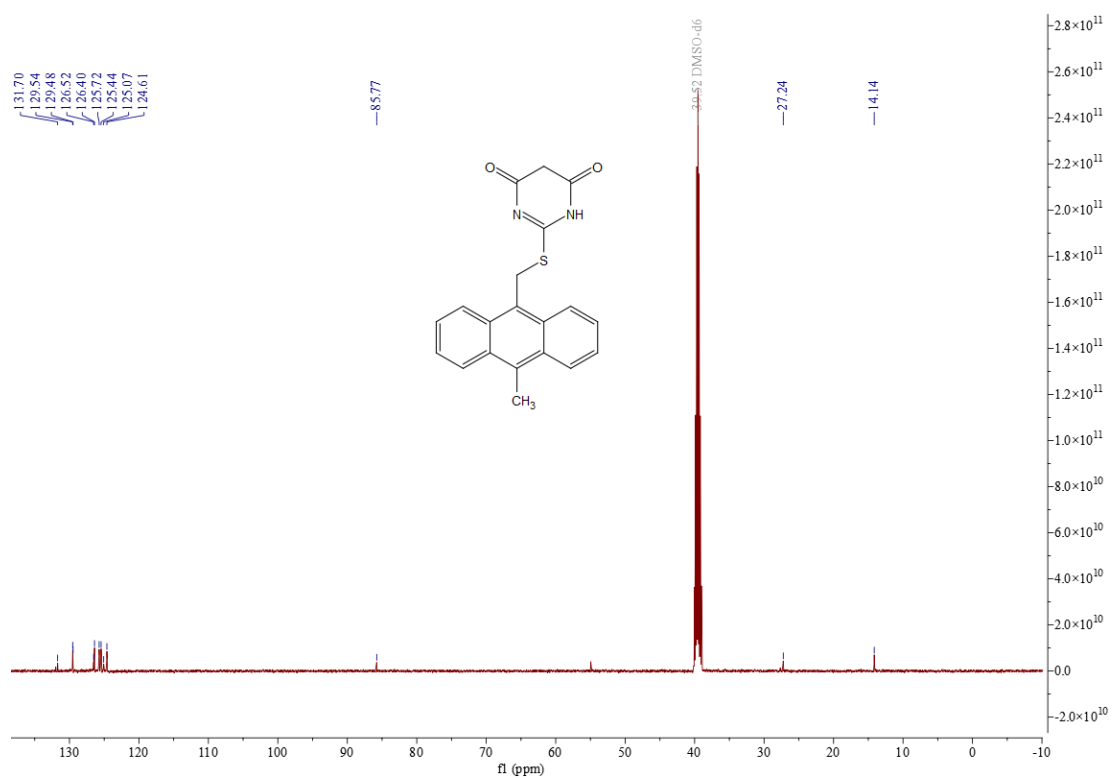

**Figure S42** <sup>13</sup>C NMR spectrum of **13h**

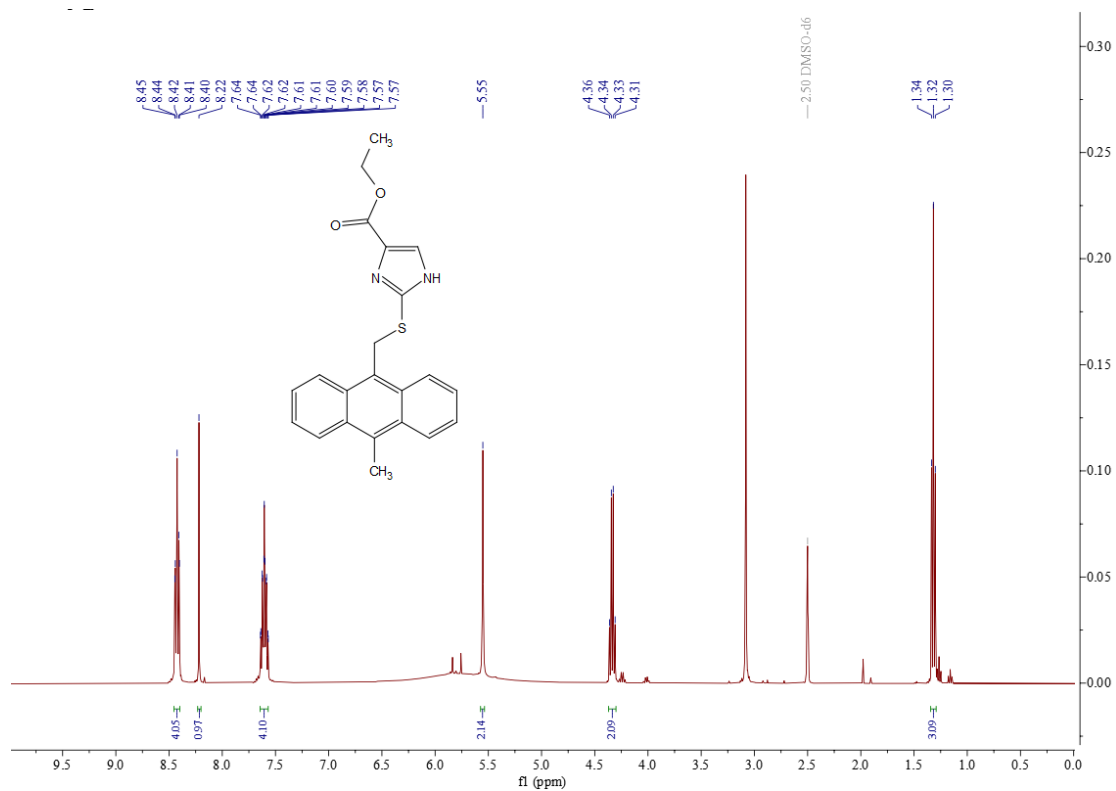

**Figure S43** <sup>1</sup>H NMR spectrum of **13i**

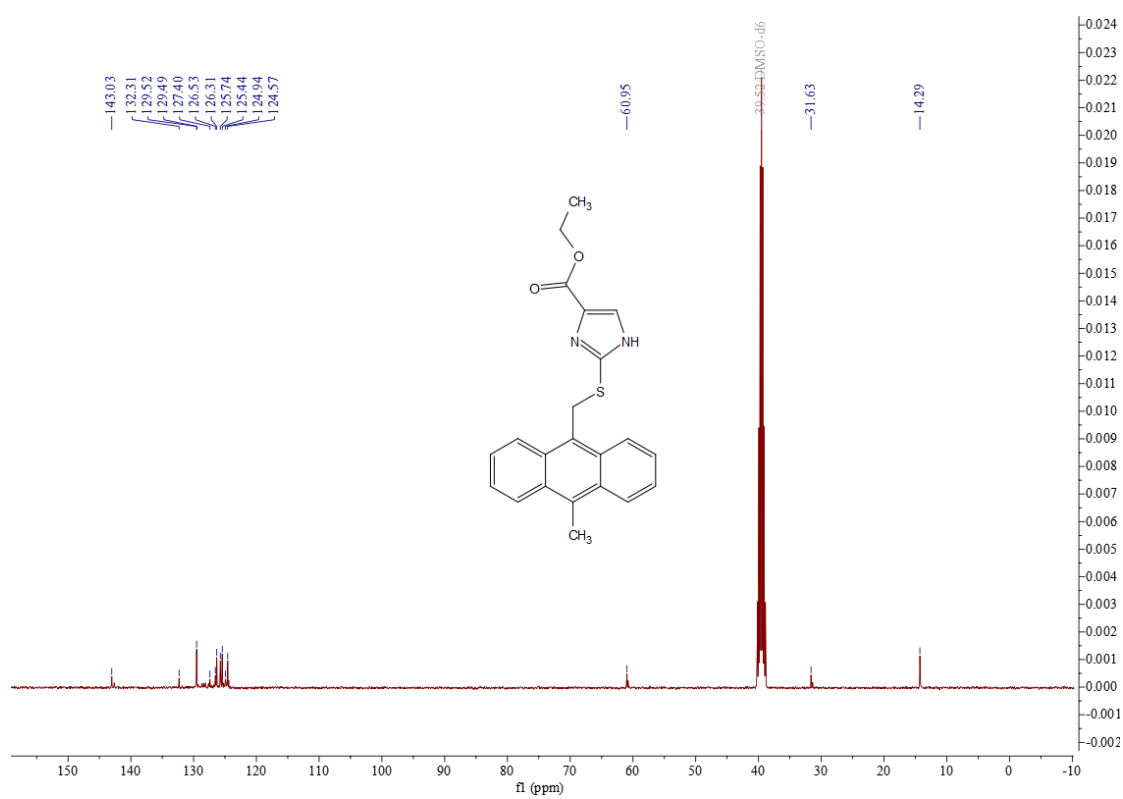

**Figure S44** <sup>13</sup>C NMR spectrum of **13i**

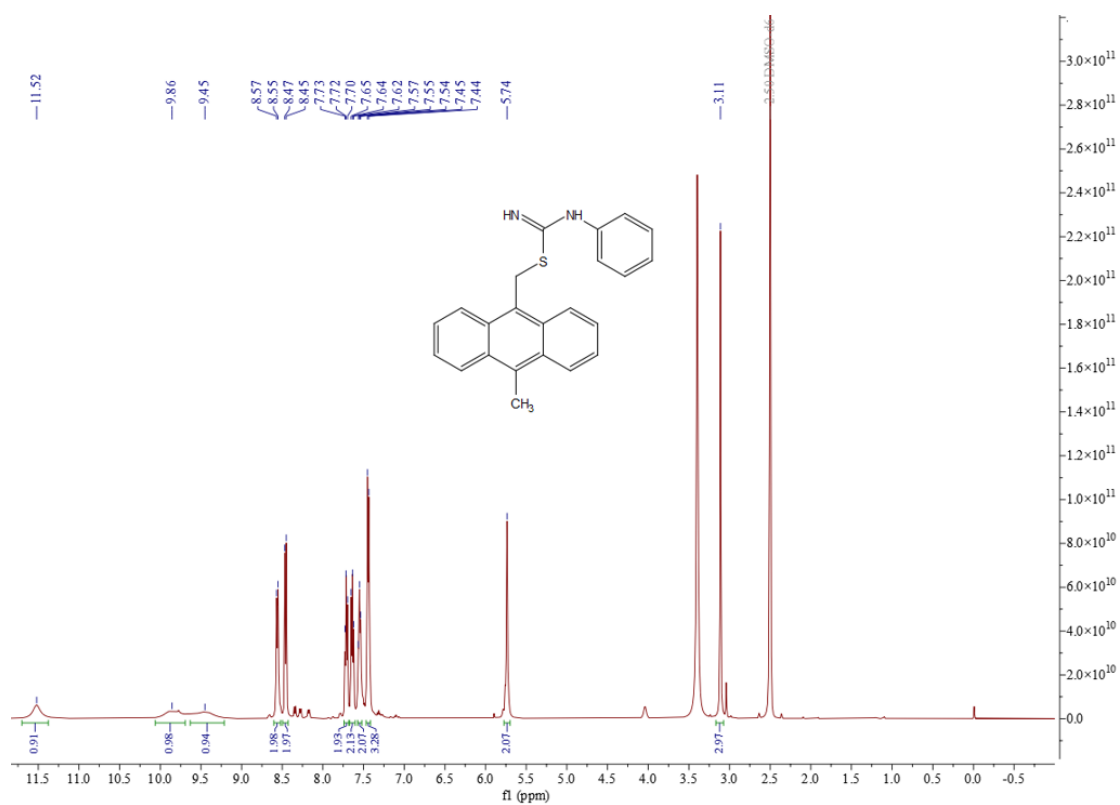

**Figure S45**  $^1\text{H}$  NMR spectrum of **13j**

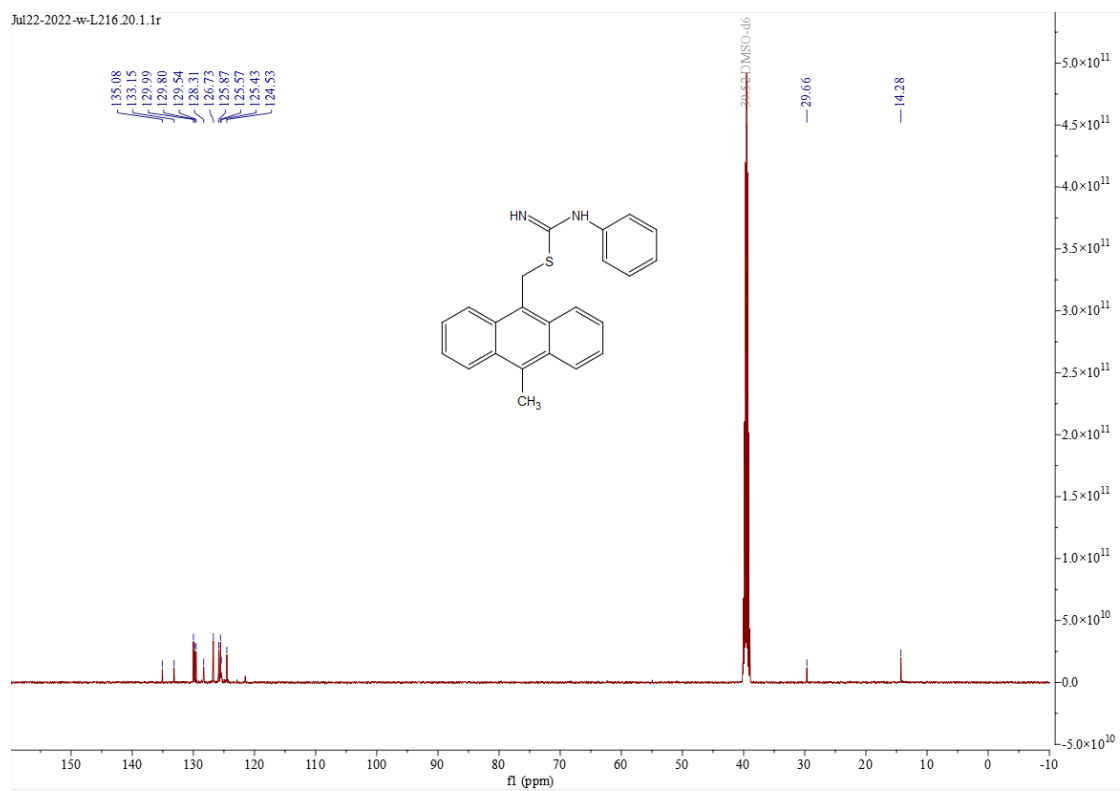

**Figure S46**  $^{13}\text{C}$  NMR spectrum of **13j**

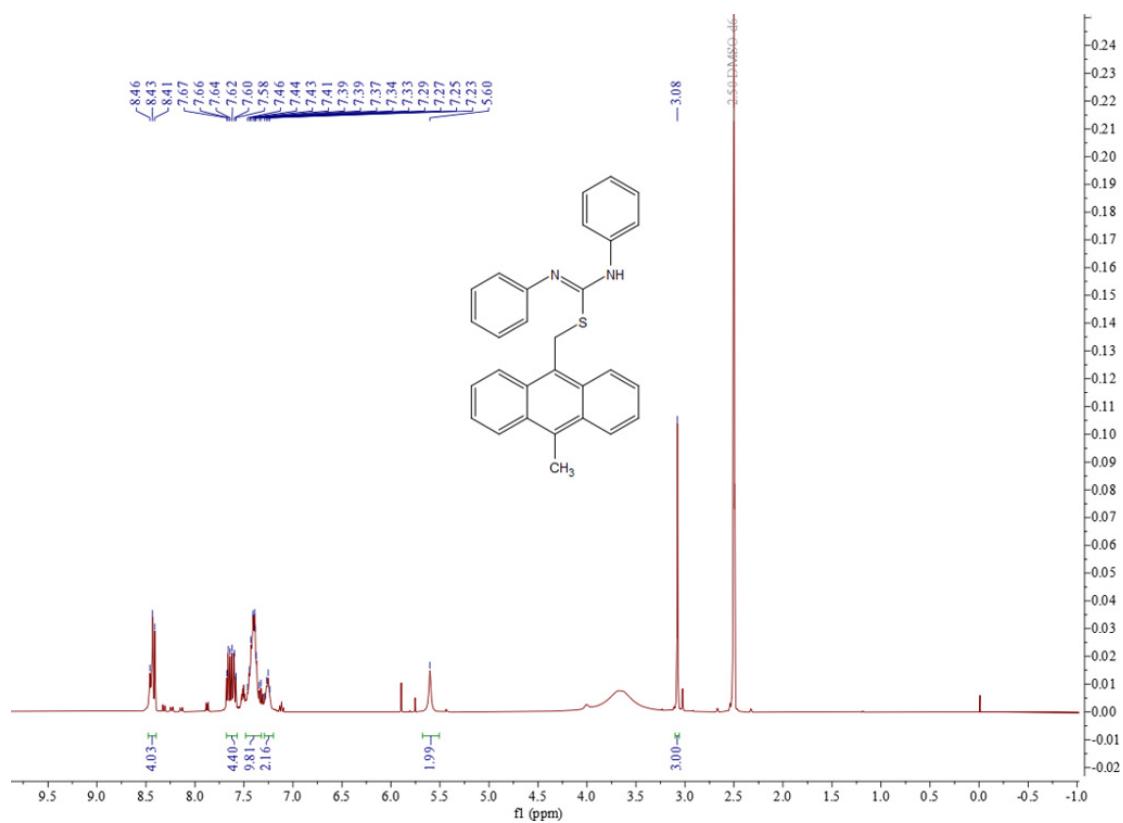

**Figure S47** <sup>1</sup>H NMR spectrum of **13k**

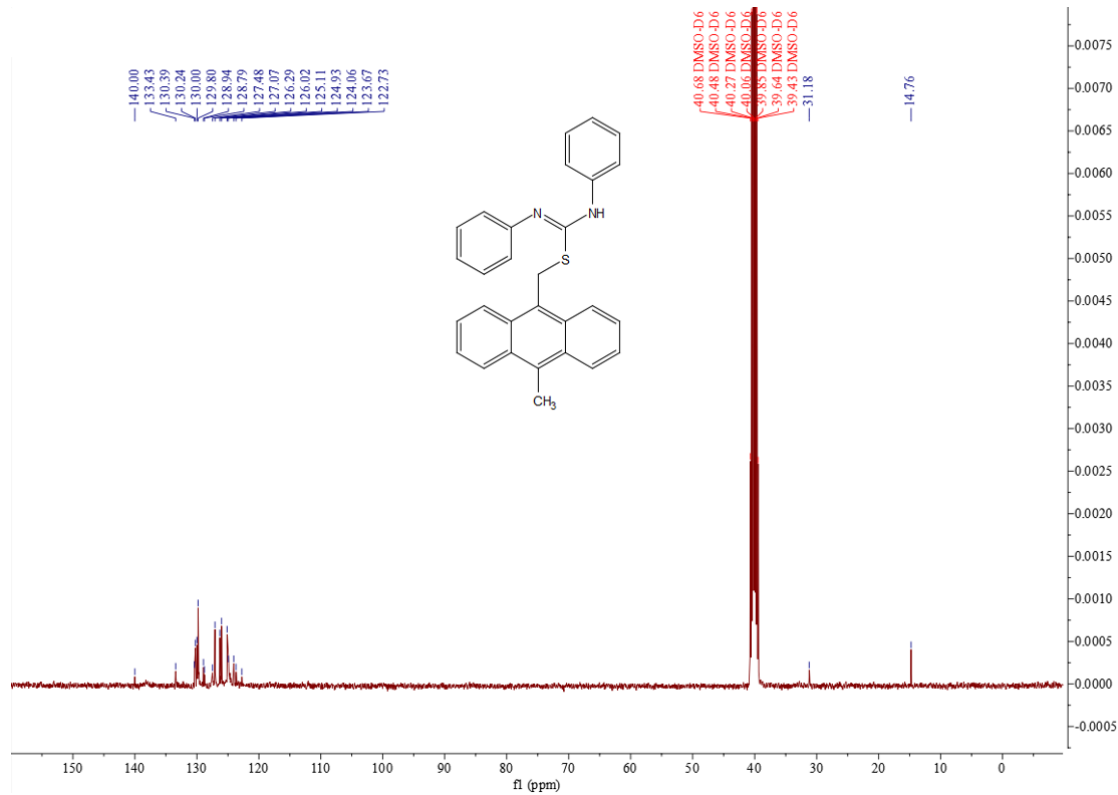

**Figure S48** <sup>13</sup>C NMR spectrum of **13k**



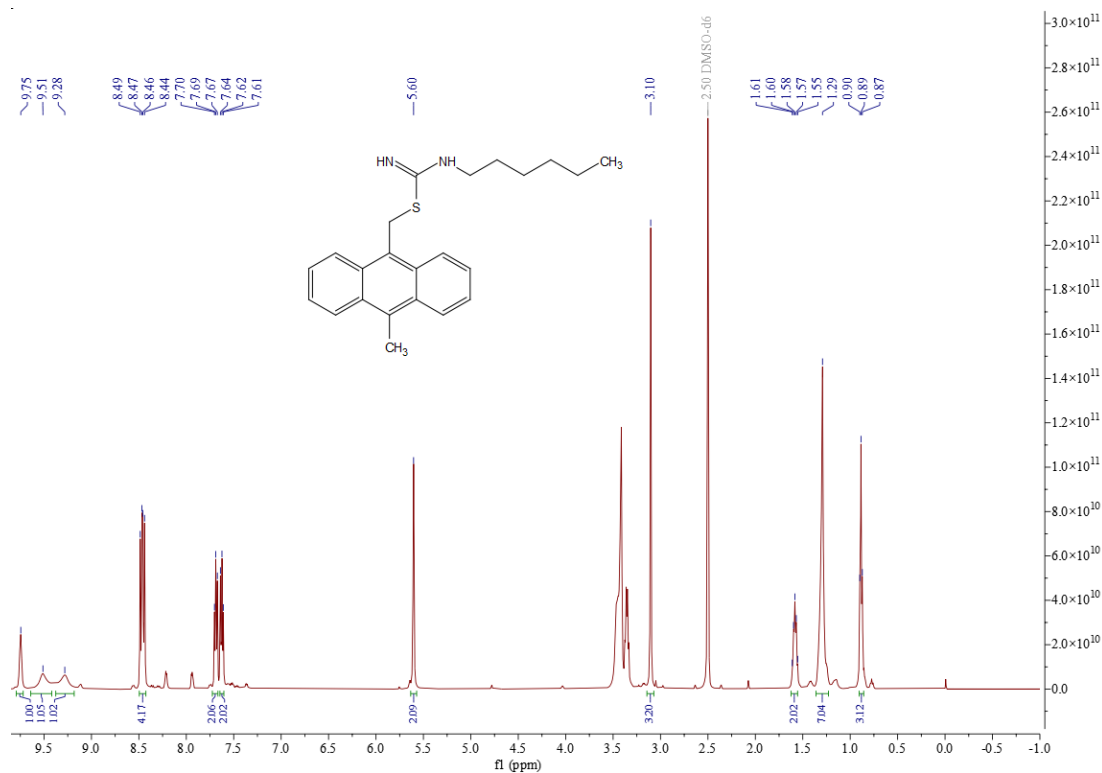

Figure S49 <sup>1</sup>H NMR spectrum of 131

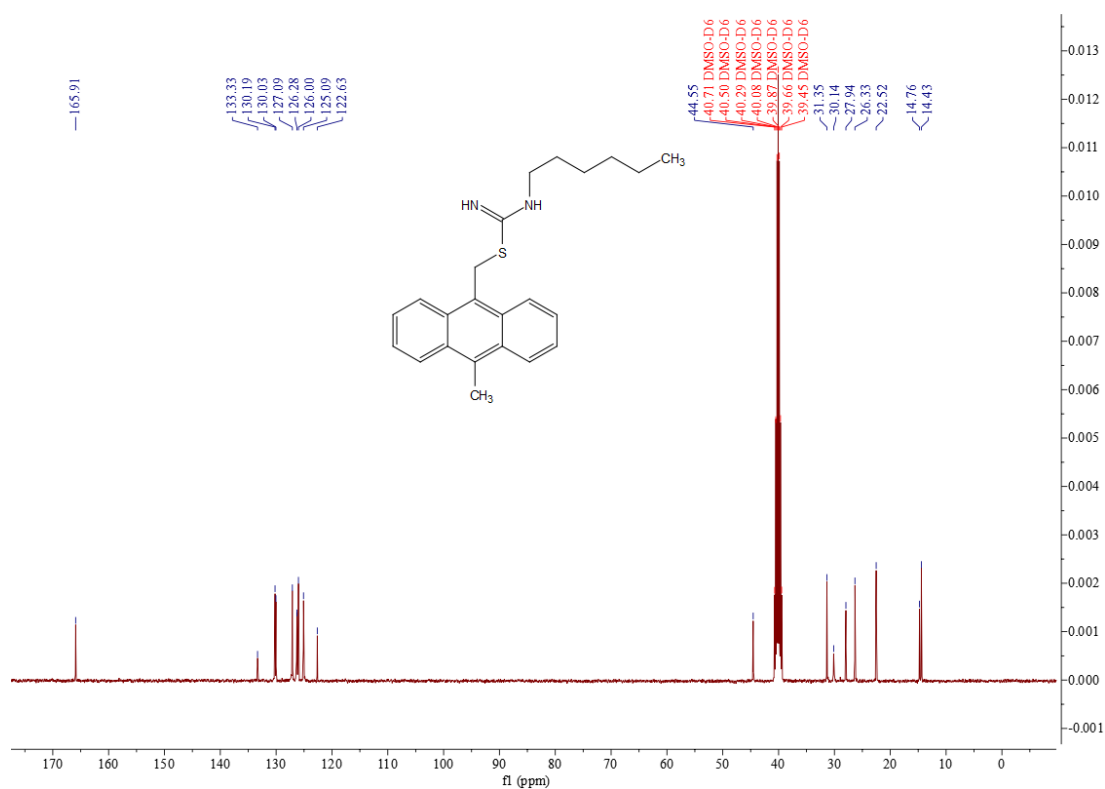

Figure S50 <sup>13</sup>C NMR spectrum of 131

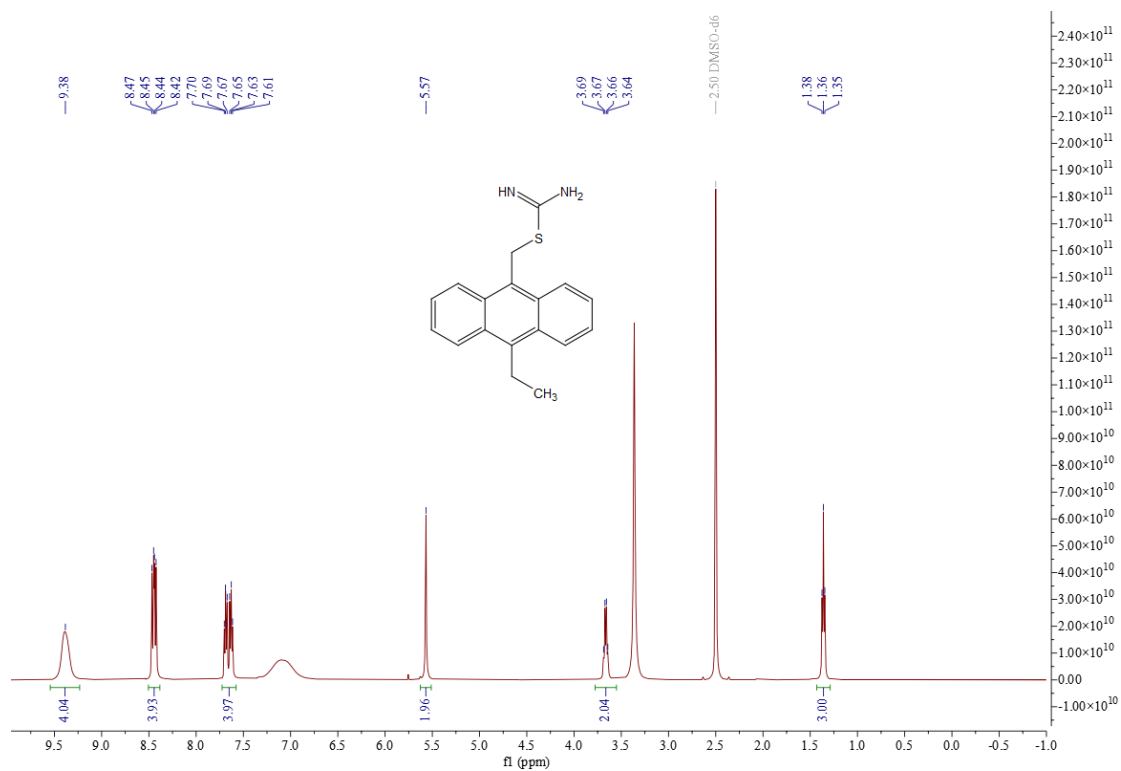

**Figure S51** <sup>1</sup>H NMR spectrum of **14a**

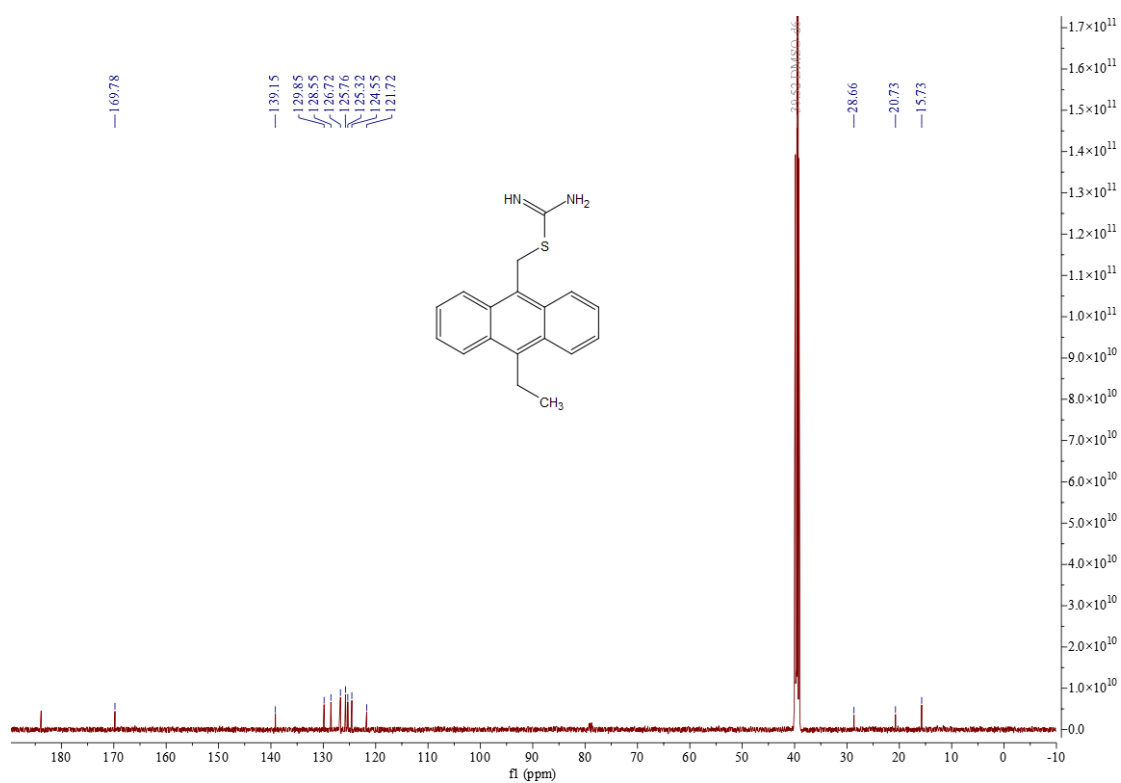

**Figure S52** <sup>13</sup>C NMR spectrum of **14a**

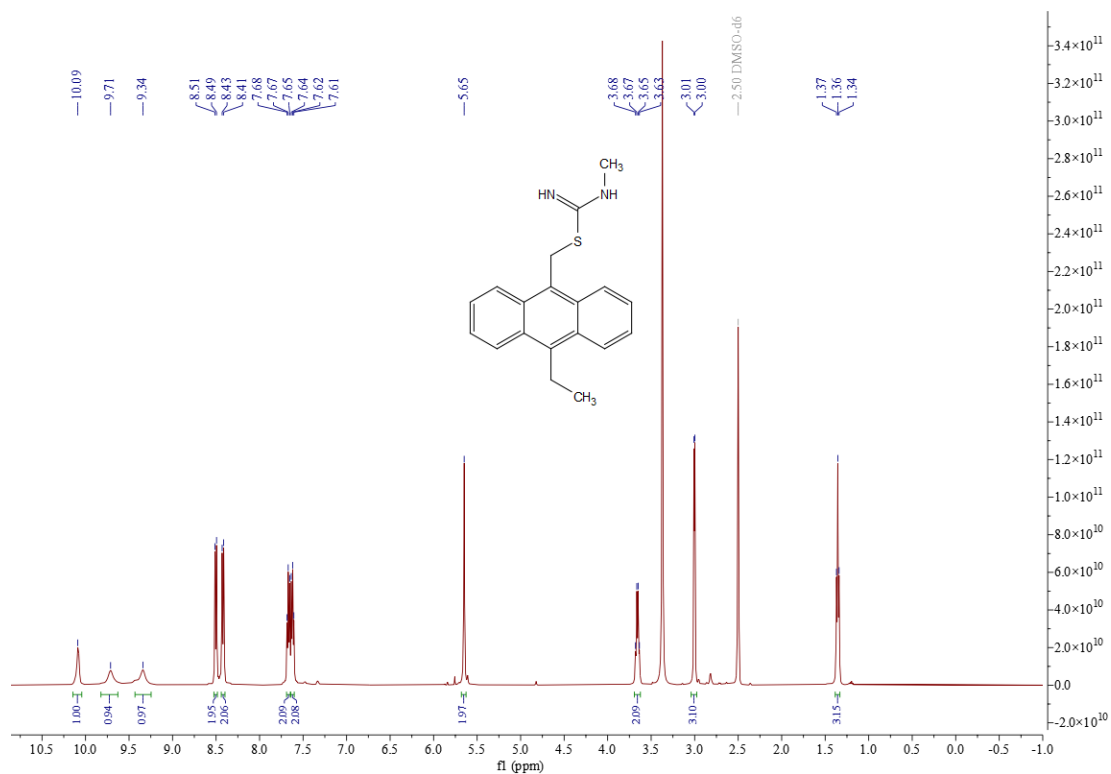

**Figure S53** <sup>1</sup>H NMR spectrum of **14b**

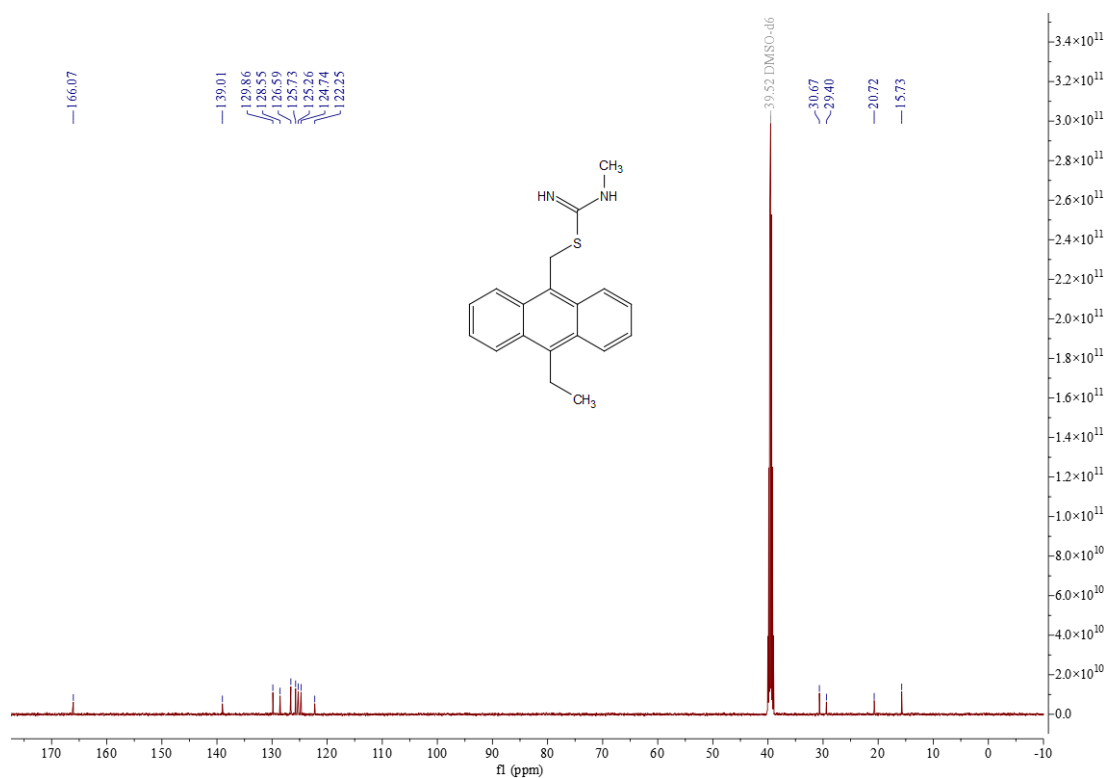

**Figure S54** <sup>13</sup>C NMR spectrum of **14b**

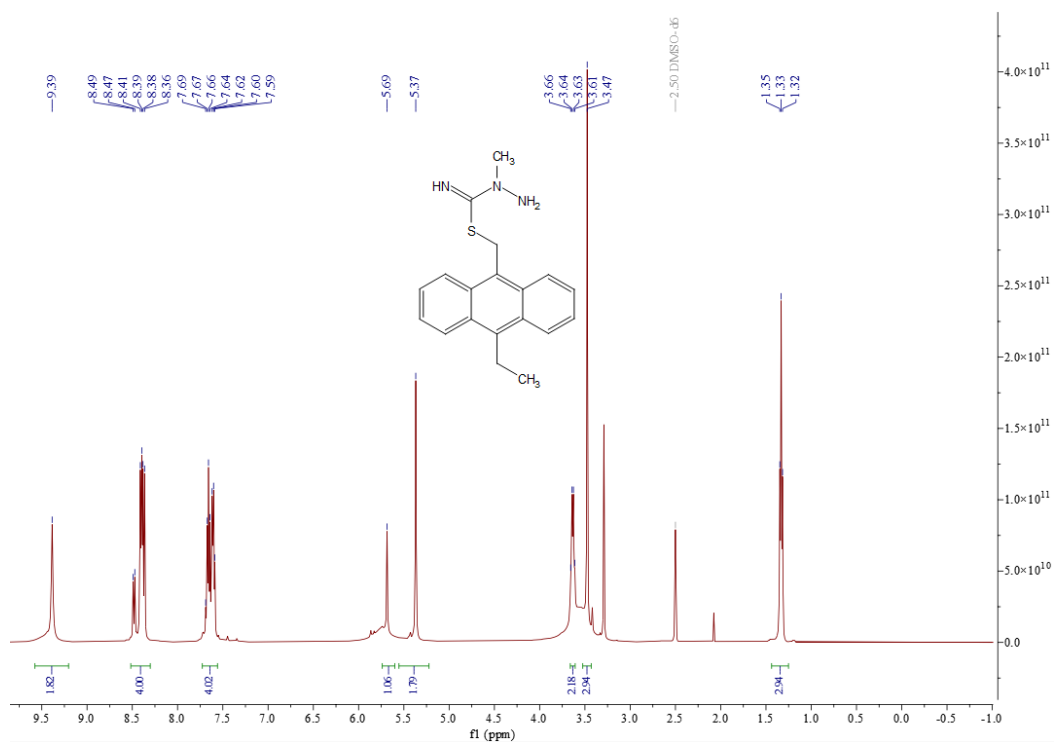

**Figure S55** <sup>1</sup>H NMR spectrum of **14c**

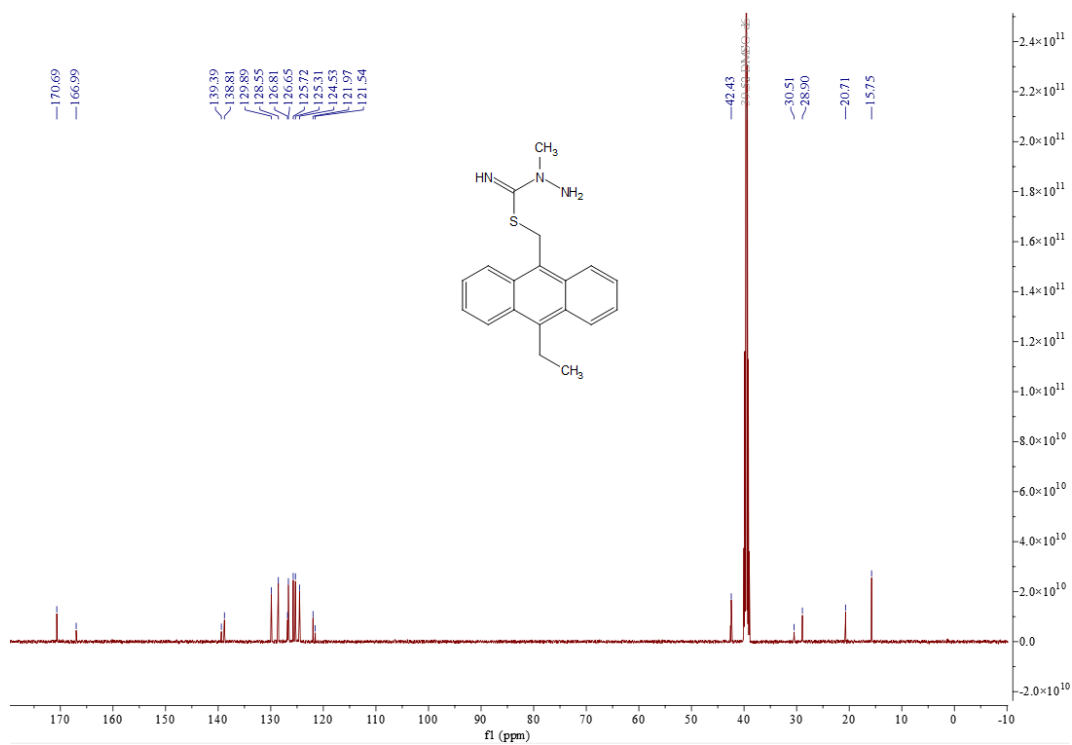

**Figure S56** <sup>13</sup>C NMR spectrum of **14c**

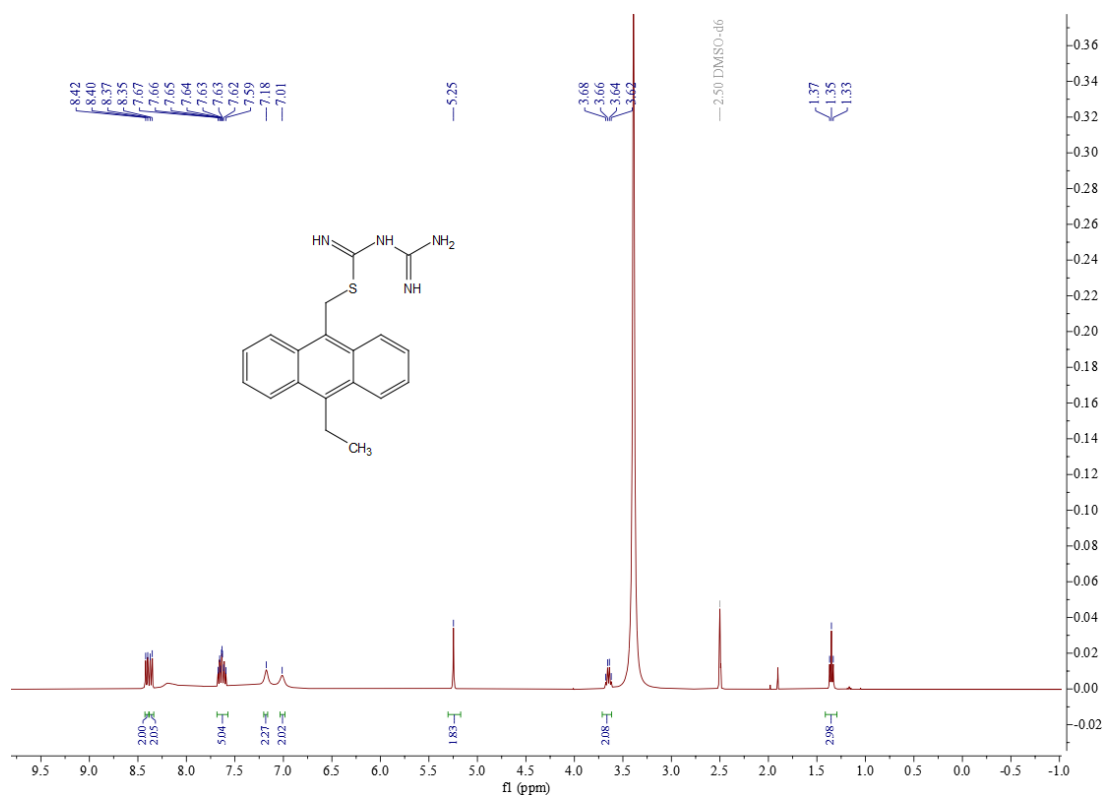

**Figure S57** <sup>1</sup>H NMR spectrum of **14d**

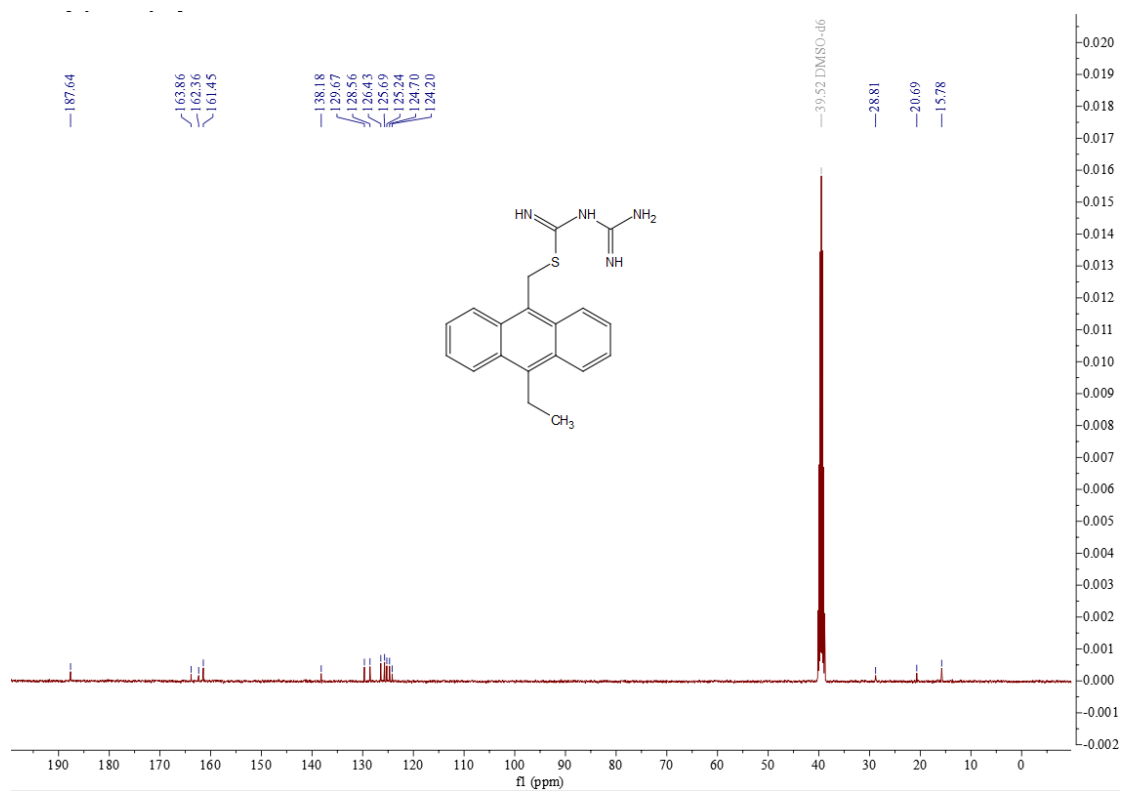

**Figure S58** <sup>13</sup>C NMR spectrum of **14d**

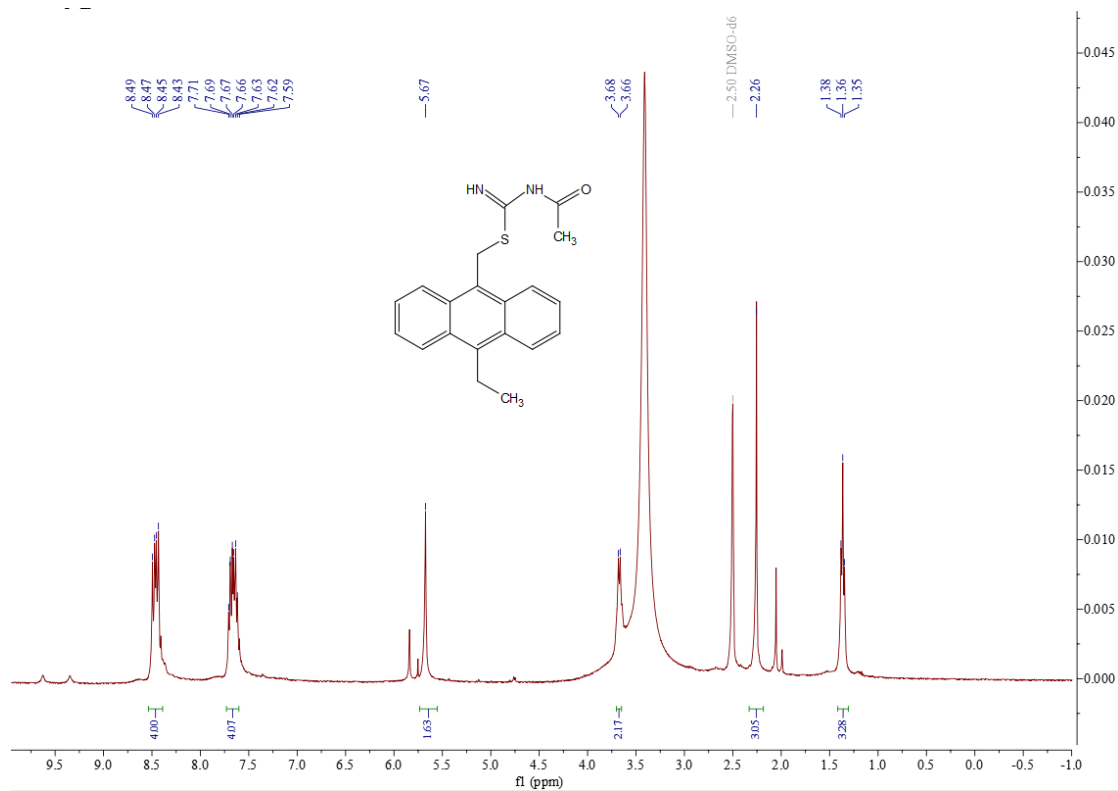

**Figure S59** <sup>1</sup>H NMR spectrum of **14e**

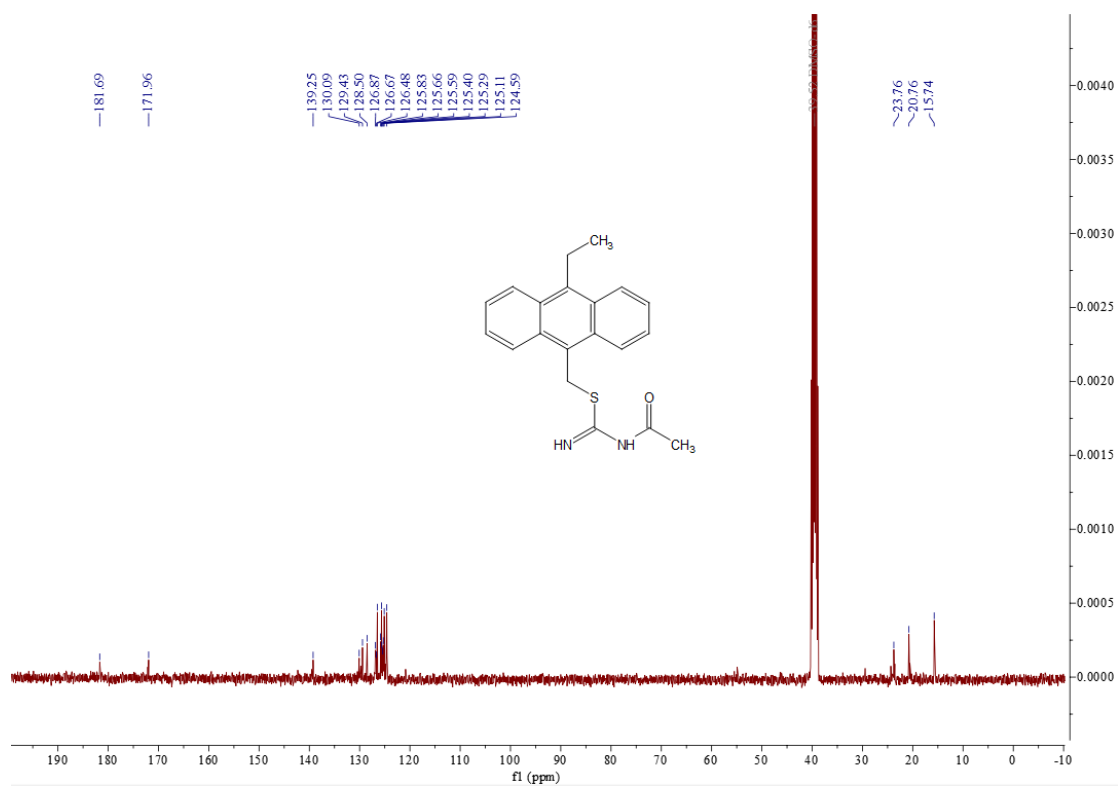

**Figure S60** <sup>13</sup>C NMR spectrum of **14e**

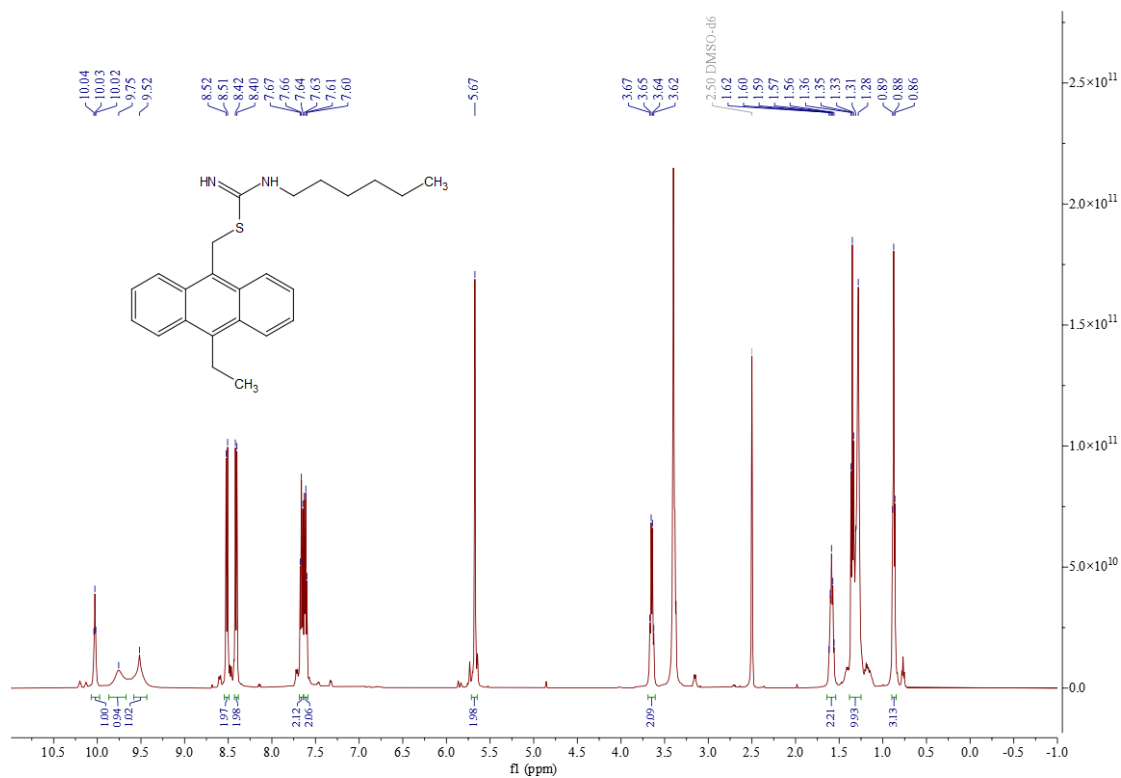

**Figure S61** <sup>1</sup>H NMR spectrum of **14f**

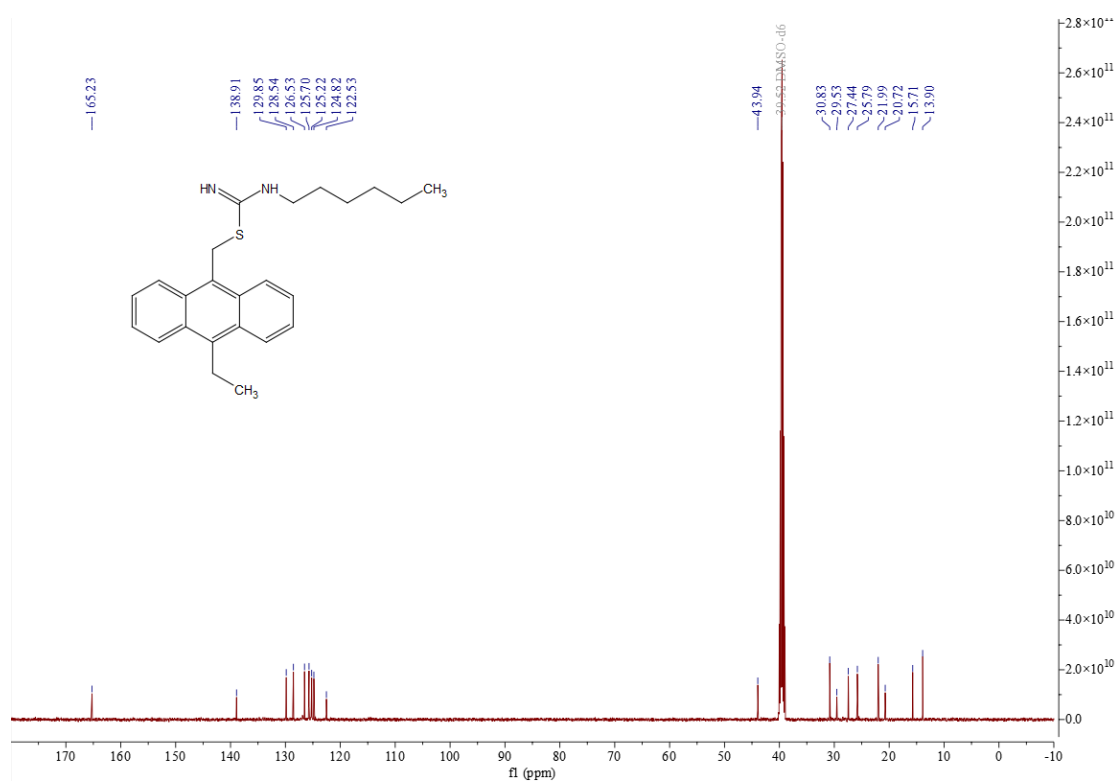

**Figure S62** <sup>13</sup>C NMR spectrum of **14f**

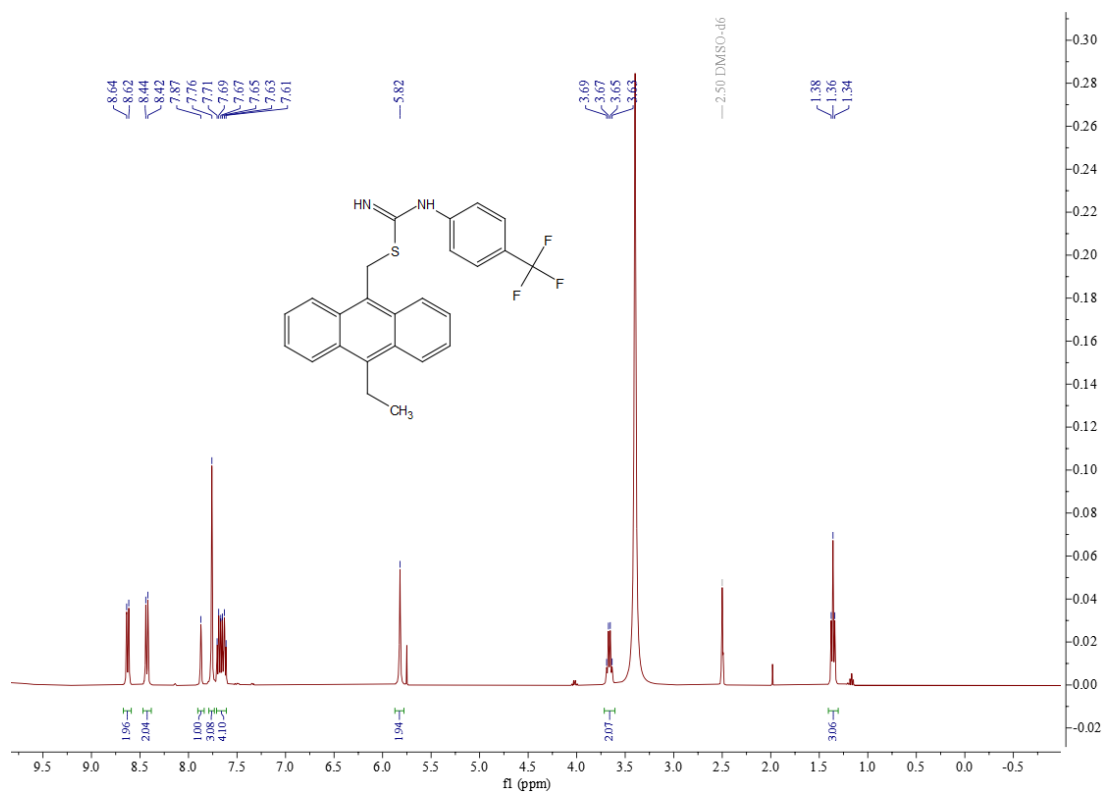

**Figure S63** <sup>1</sup>H NMR spectrum of **14g**

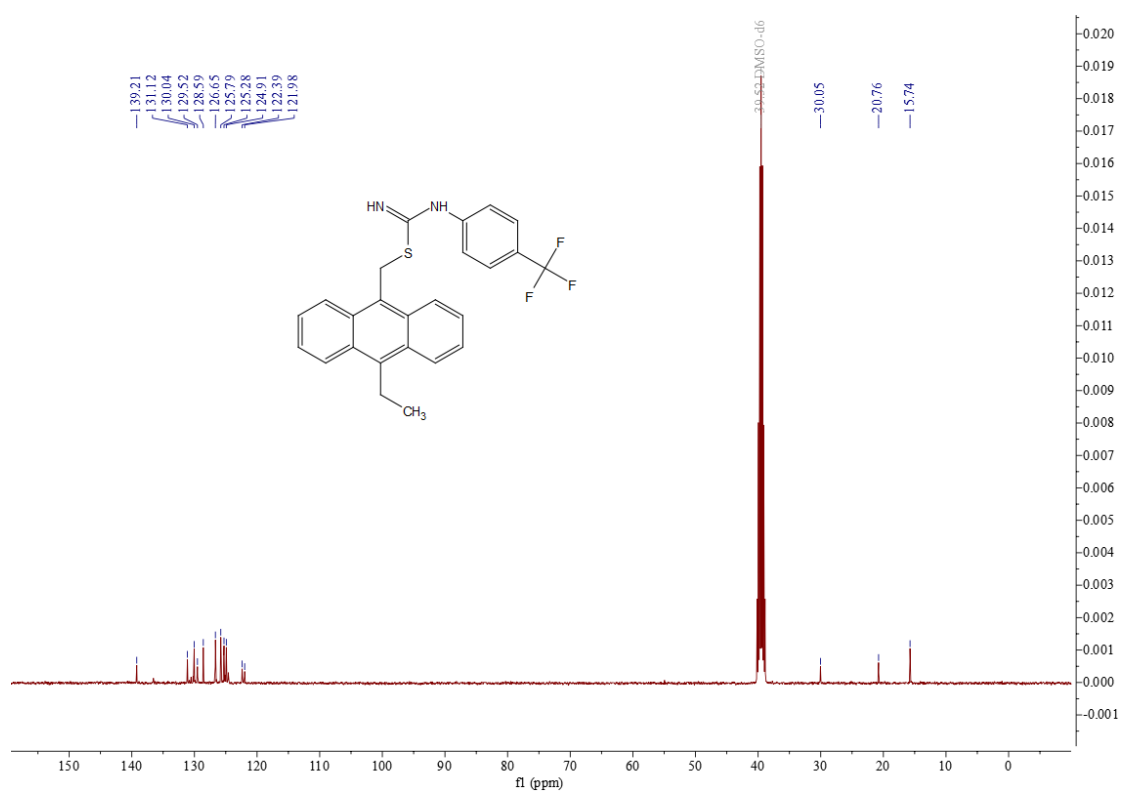

**Figure S64** <sup>13</sup>C NMR spectrum of **14g**



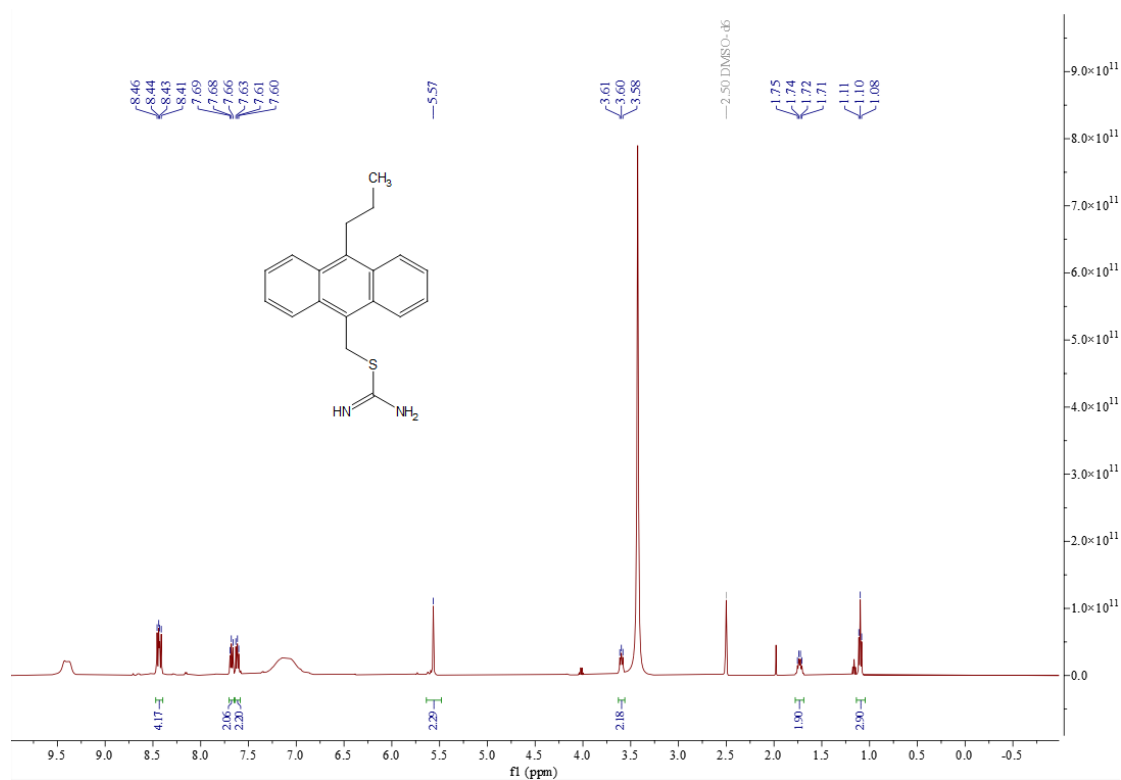

**Figure S65** <sup>1</sup>H NMR spectrum of **14h**

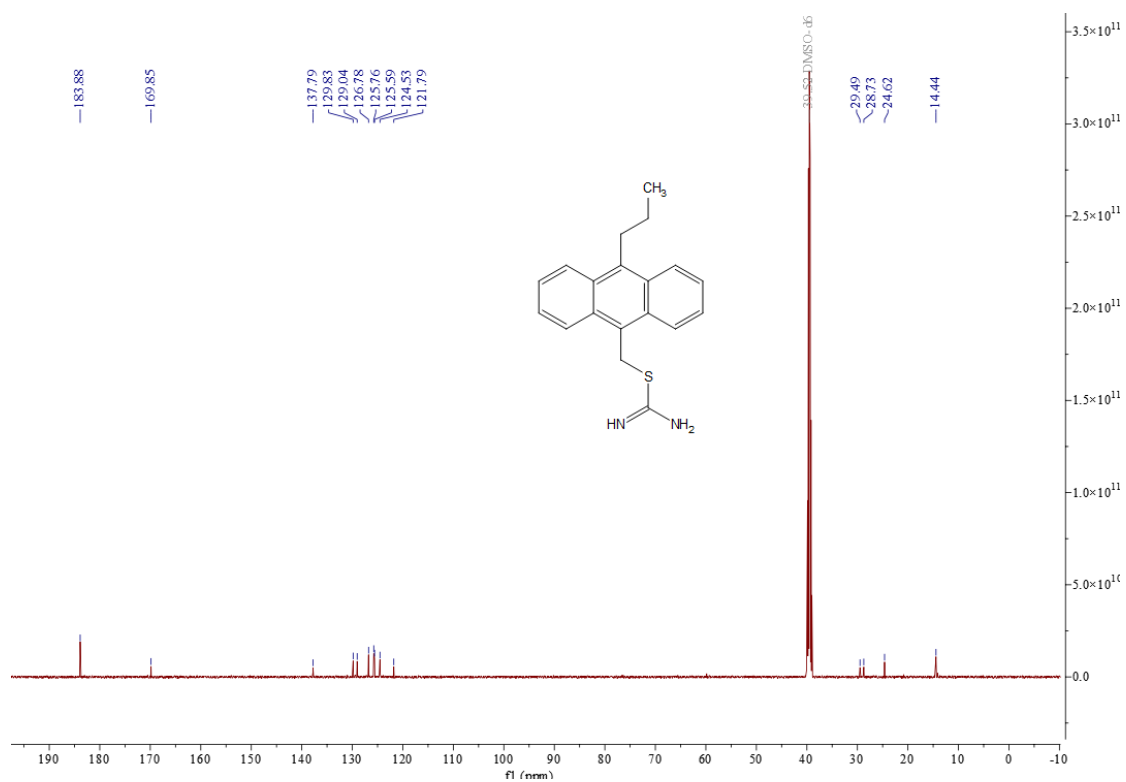

**Figure S66** <sup>13</sup>C NMR spectrum of **14h**

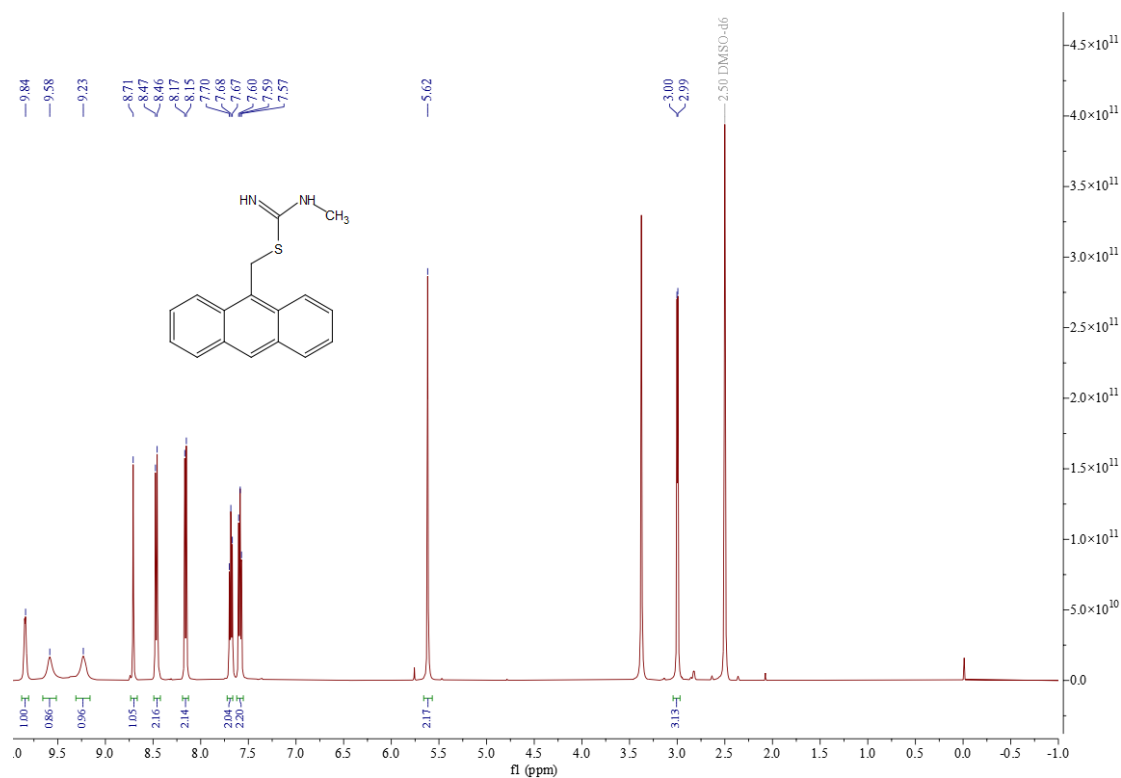

Figure S67 <sup>1</sup>H NMR spectrum of 14i

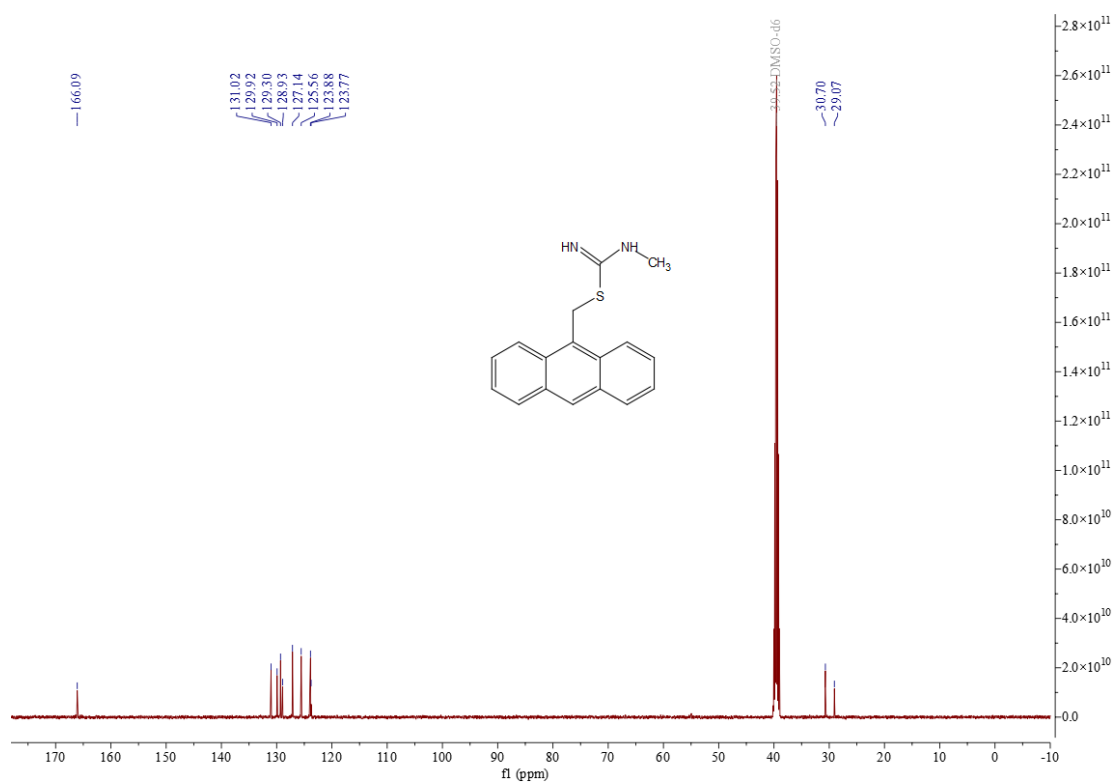

Figure S68 <sup>13</sup>C NMR spectrum of 14i

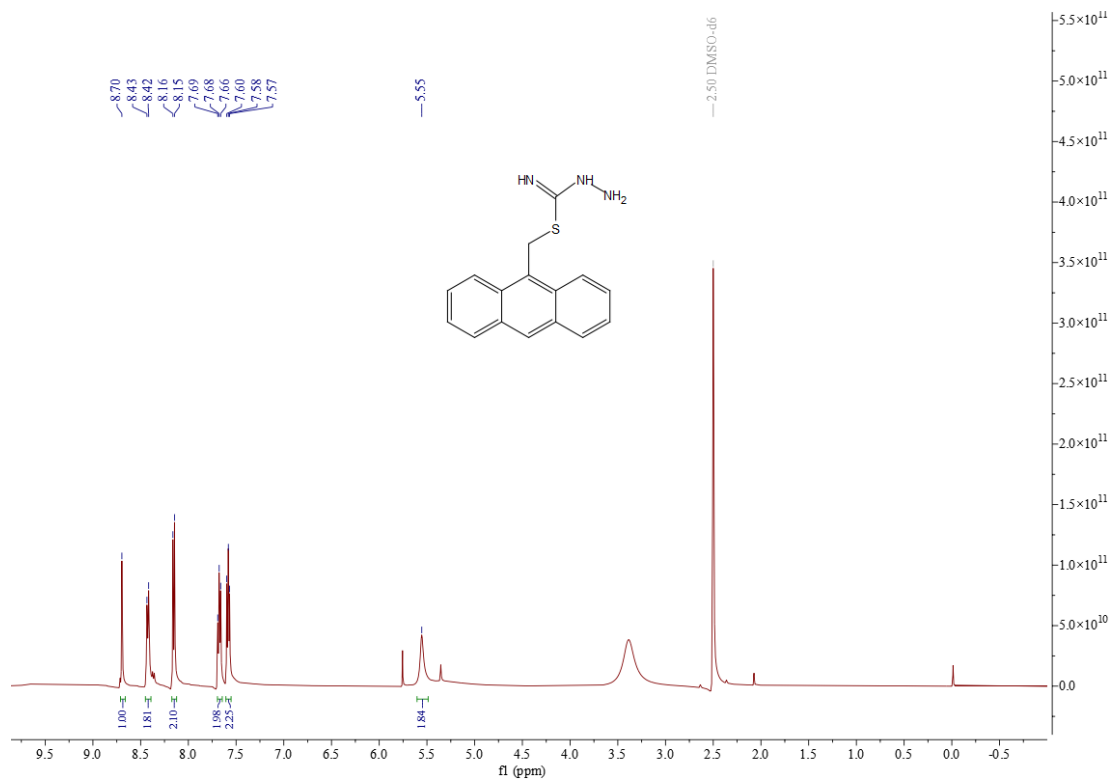

**Figure S69** <sup>1</sup>H NMR spectrum of **14j**

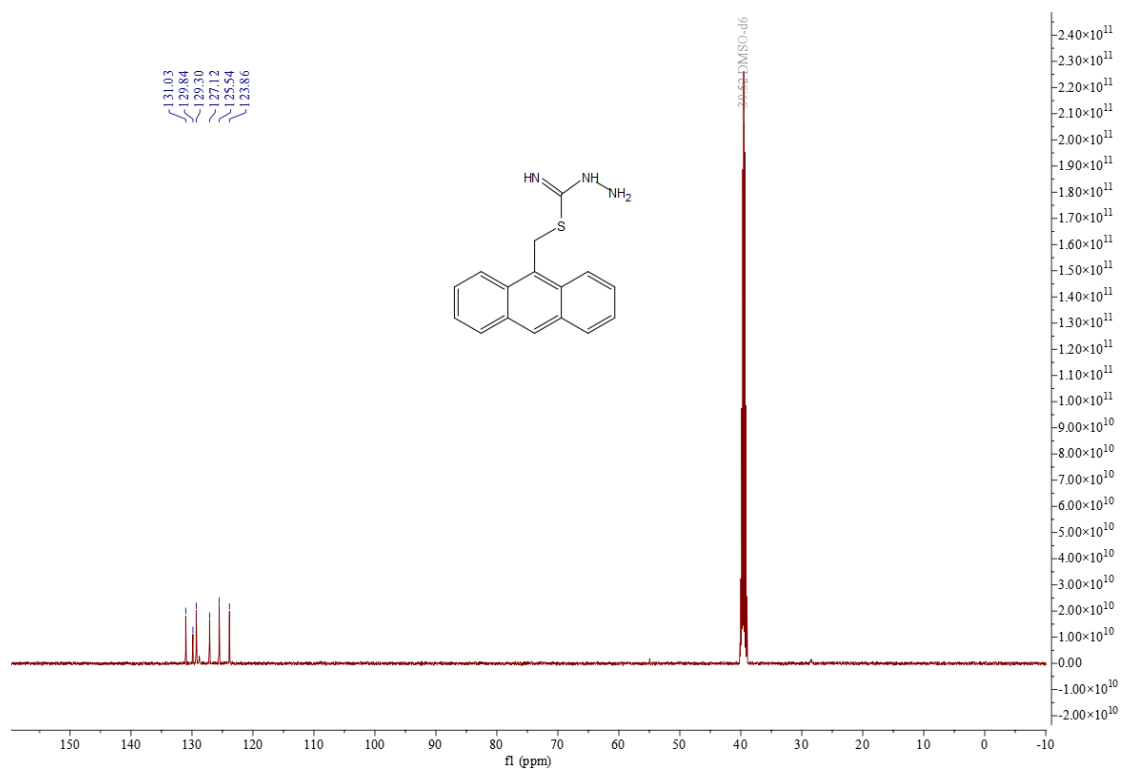

**Figure S70** <sup>13</sup>C NMR spectrum of **14j**

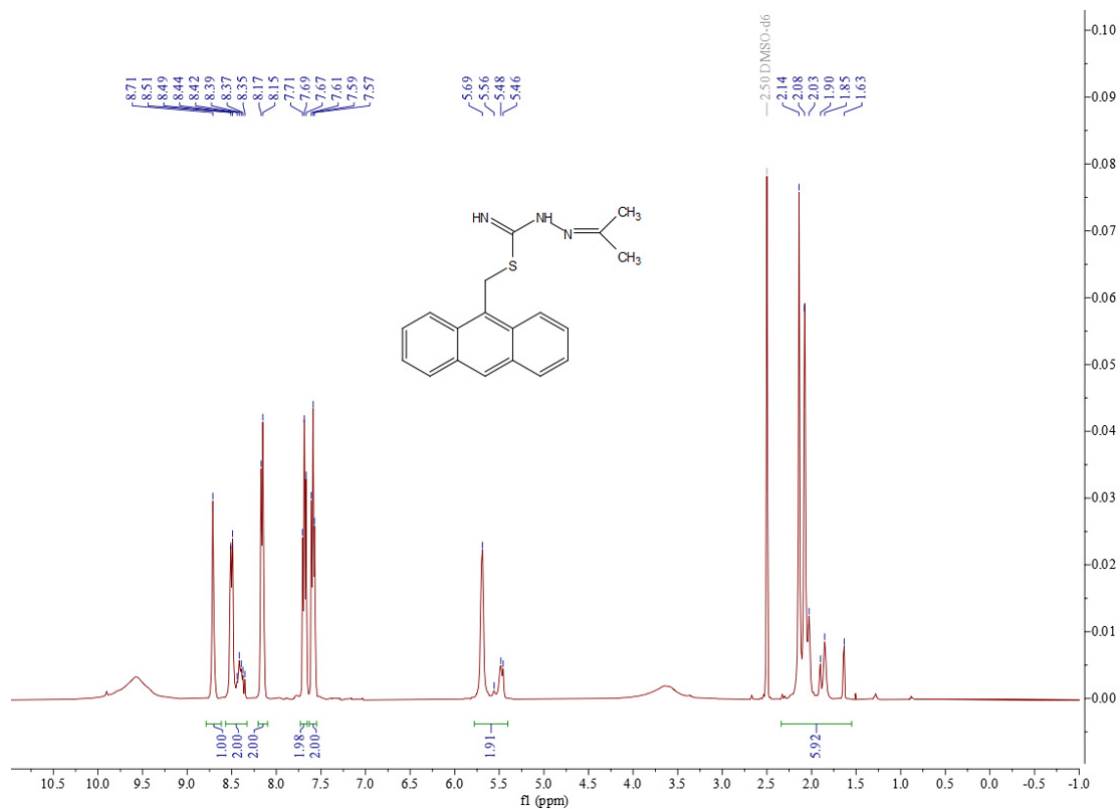

**Figure S71** <sup>1</sup>H NMR spectrum of 14k

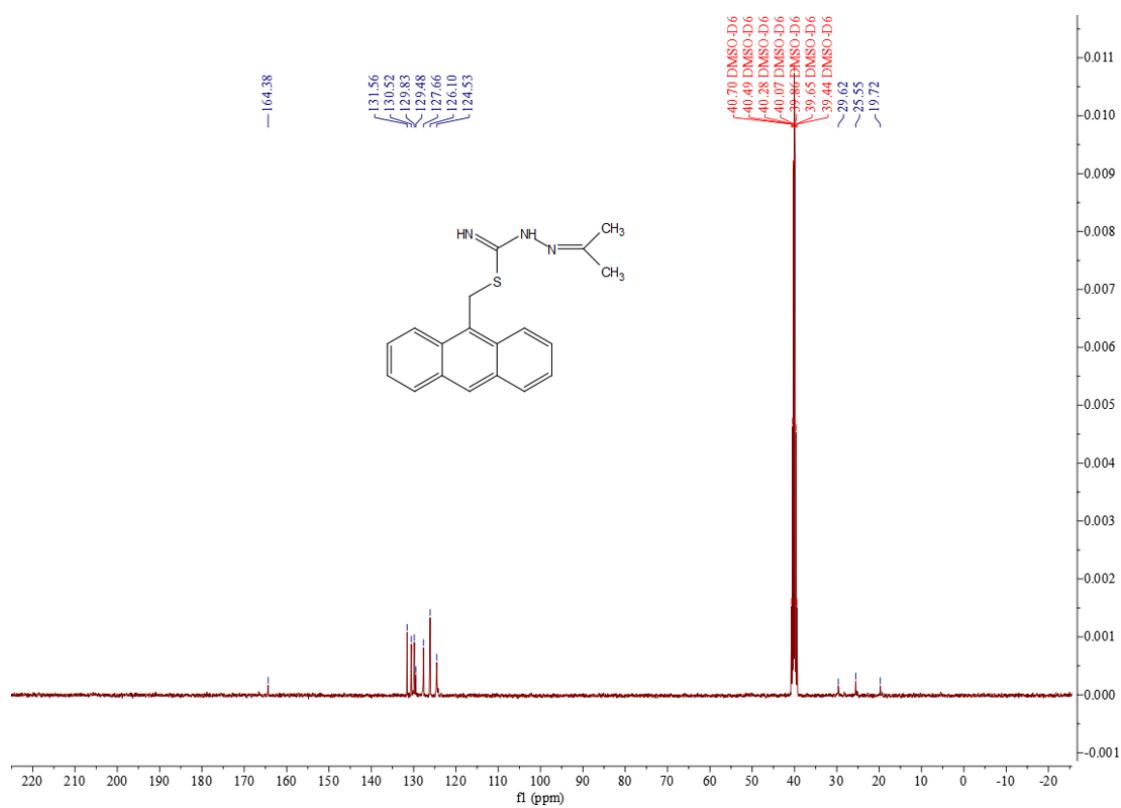

**Figure S72** <sup>13</sup>C NMR spectrum of 14k

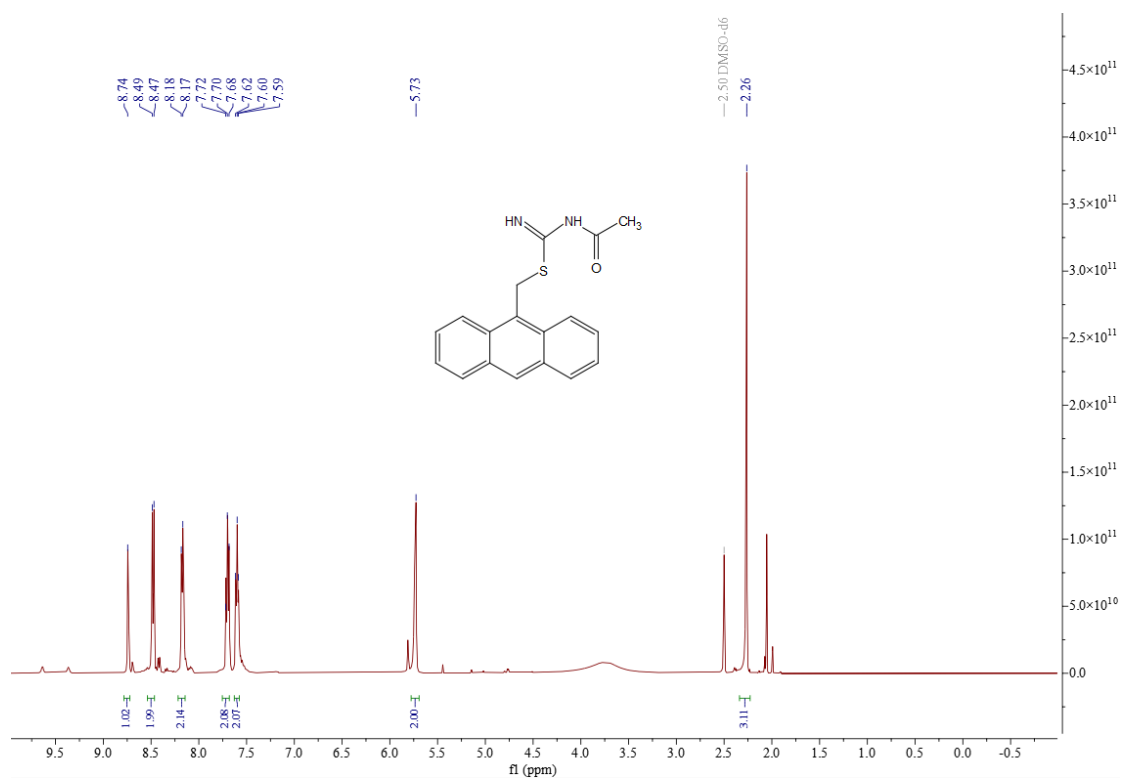

**Figure S73 <sup>1</sup>H NMR spectrum of 14l**

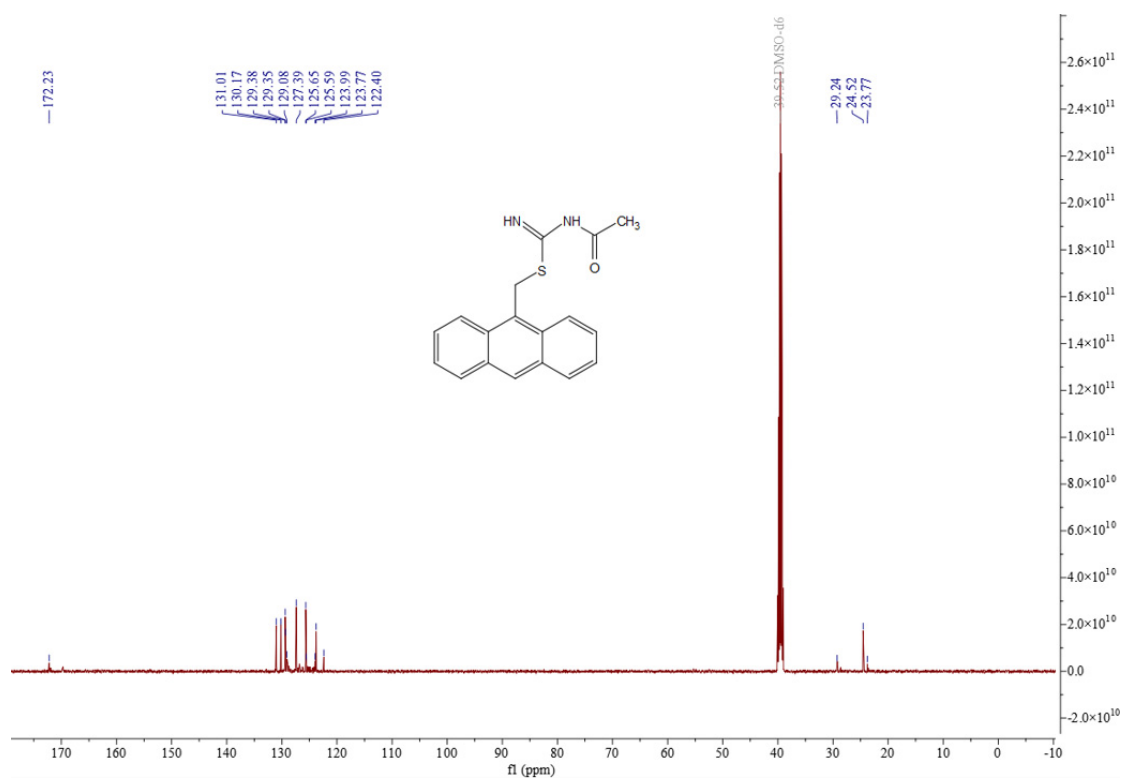

**Figure S74 <sup>13</sup>C NMR spectrum of 14l**

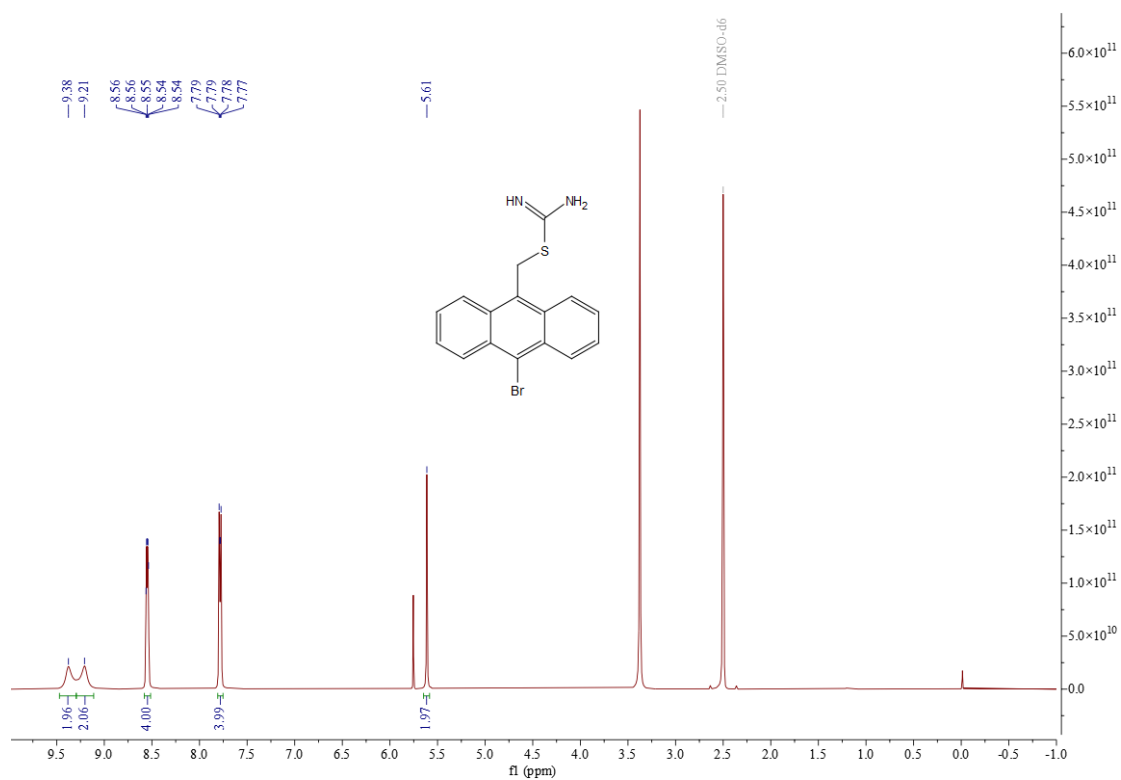

**Figure S75** <sup>1</sup>H NMR spectrum of **14m**

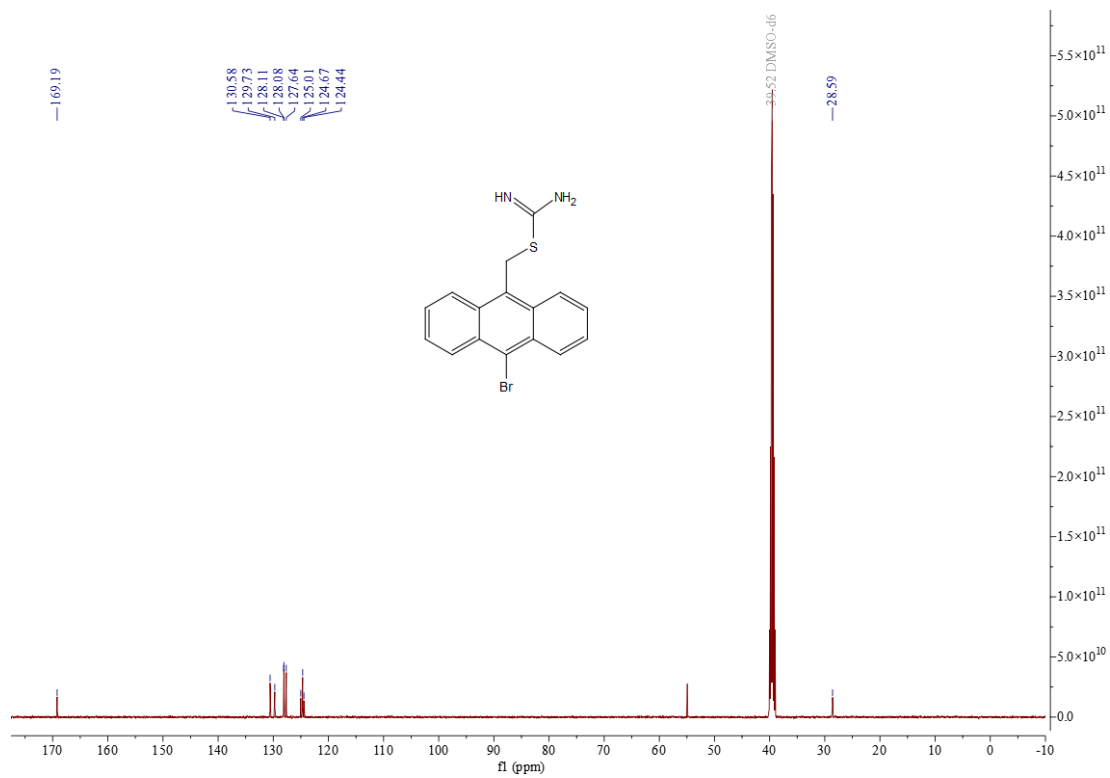

**Figure S76** <sup>13</sup>C NMR spectrum of **14m**

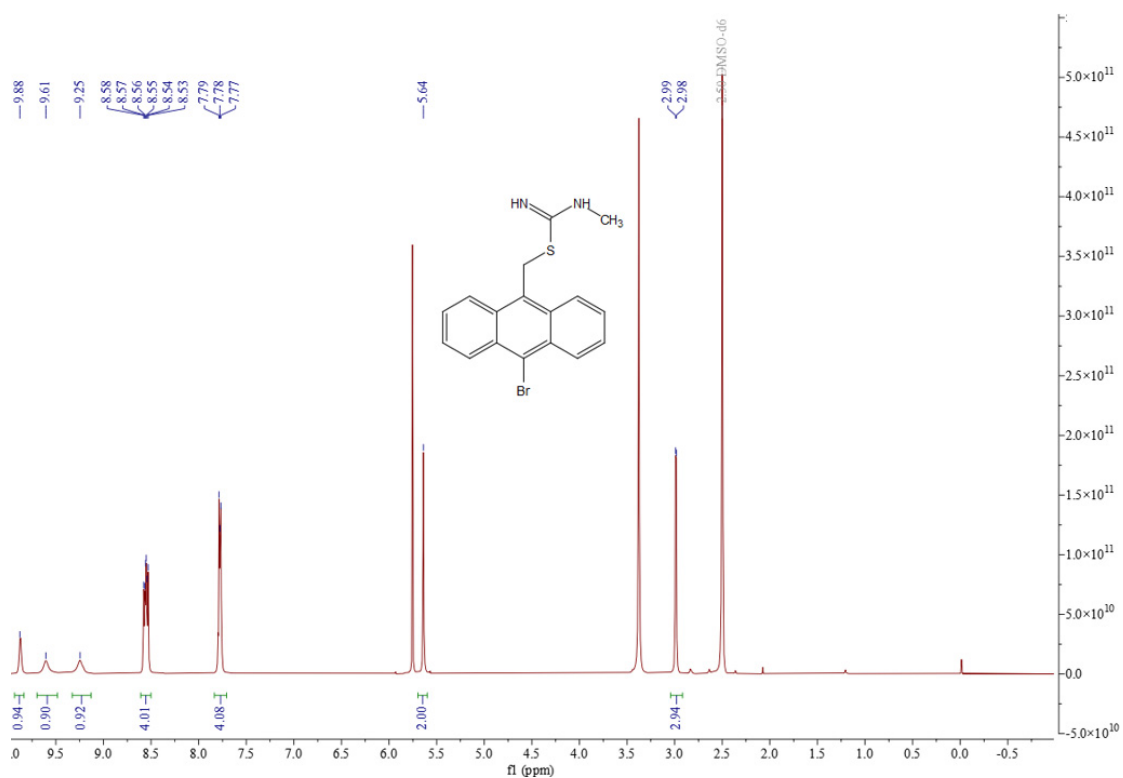

**Figure S77** <sup>1</sup>H NMR spectrum of 14n

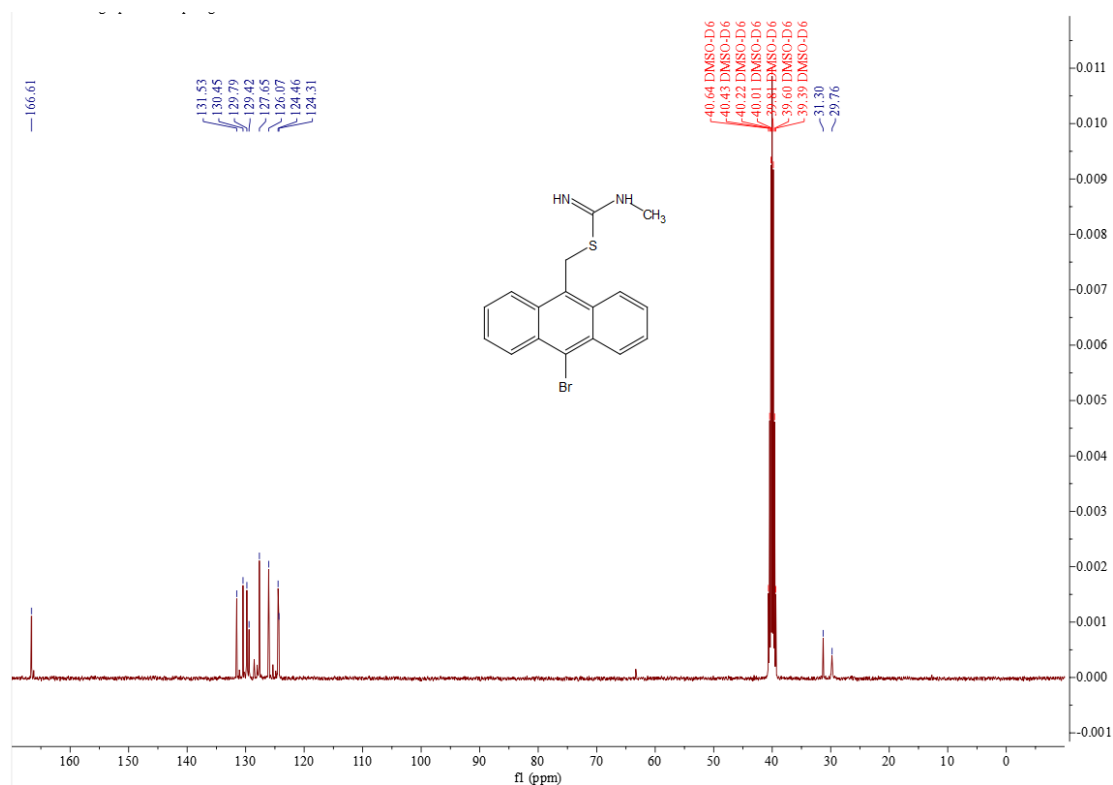

**Figure S78** <sup>13</sup>C NMR spectrum of 14n

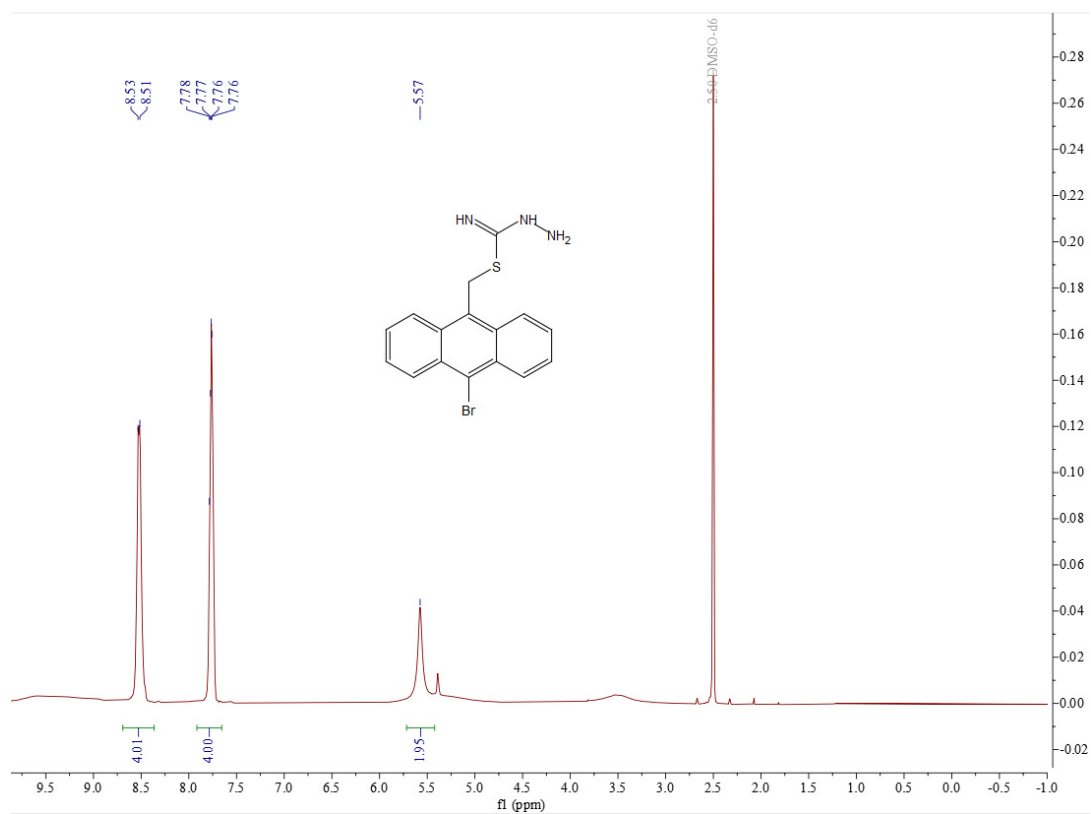

**Figure S79** <sup>1</sup>H NMR spectrum of **14o**

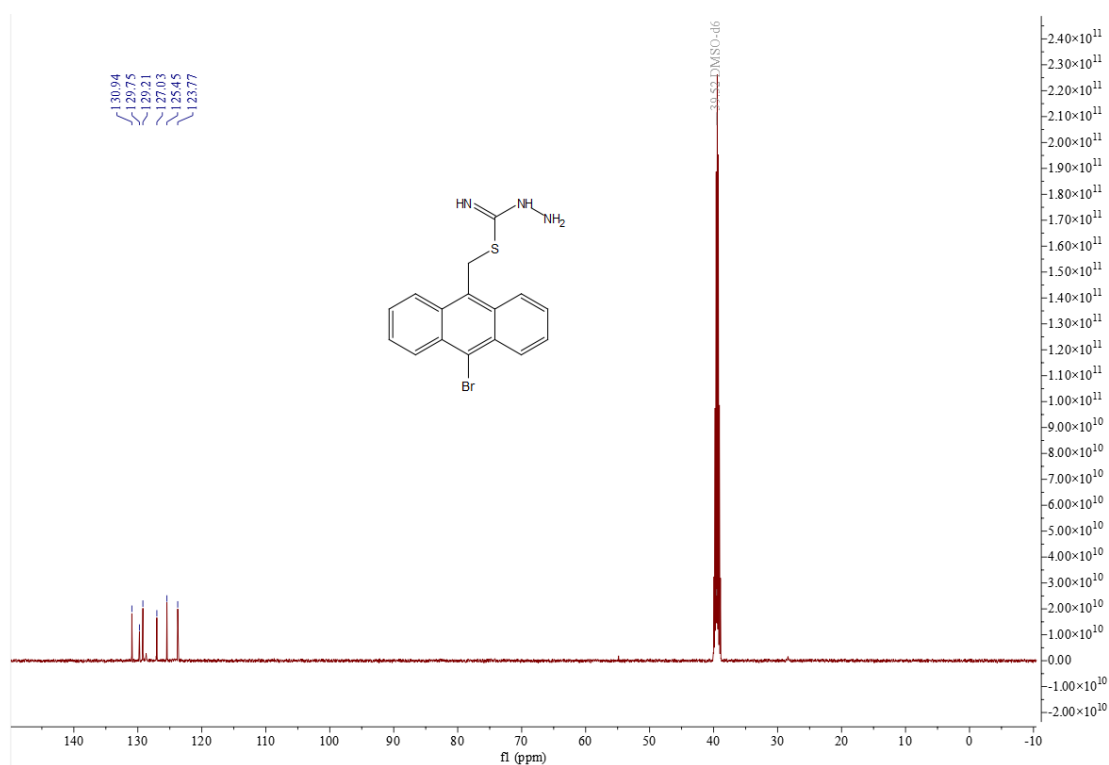

**Figure S80** <sup>13</sup>C NMR spectrum of **14o**



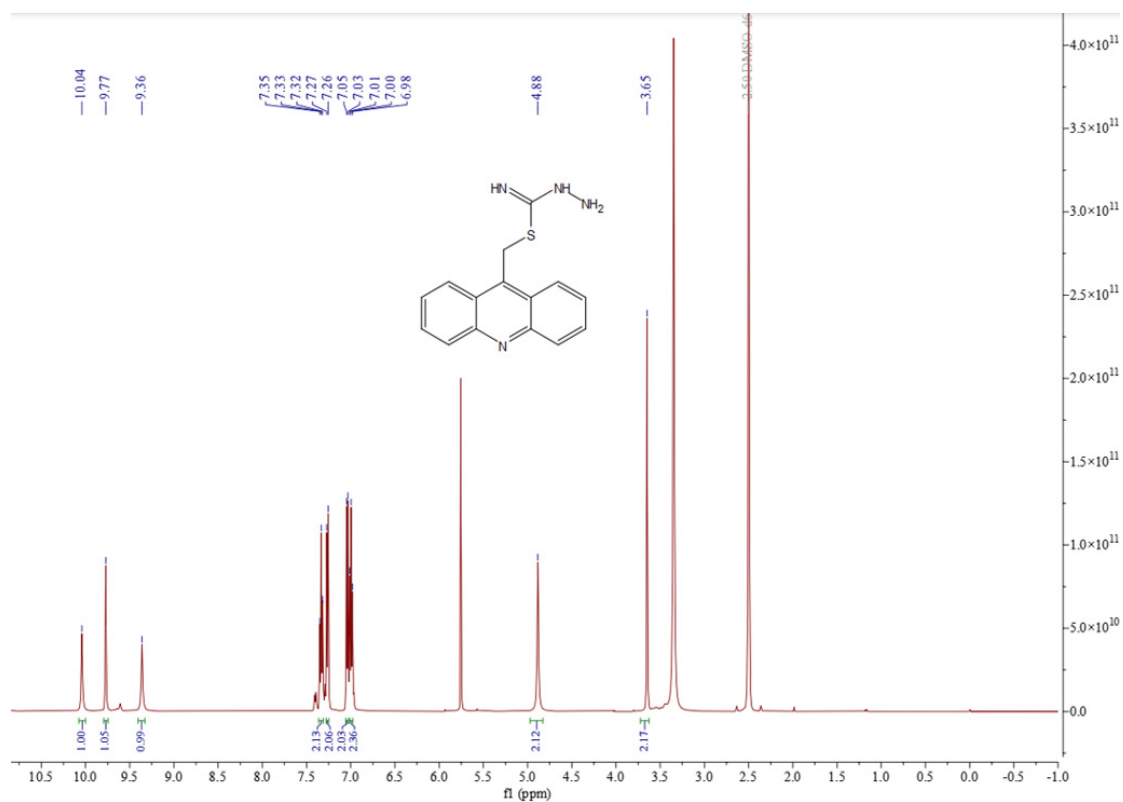

Figure S81 <sup>1</sup>H NMR spectrum of 14p

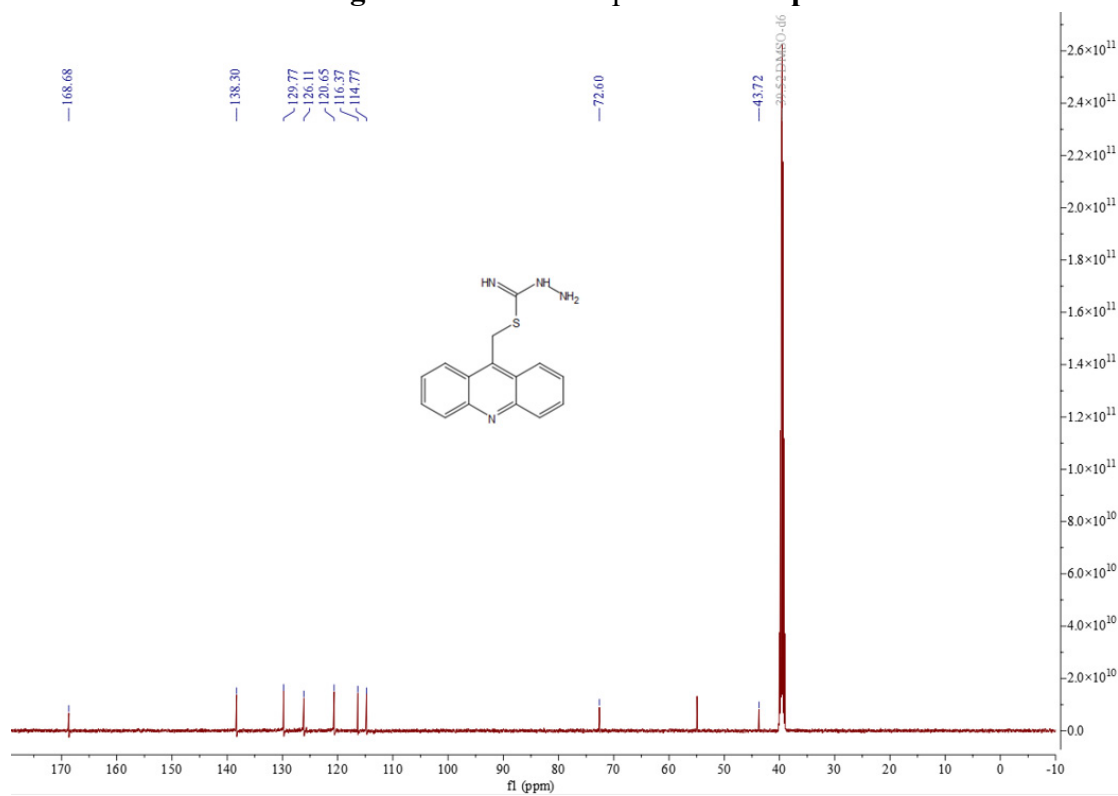

Figure S82 <sup>13</sup>C NMR spectrum of 14p

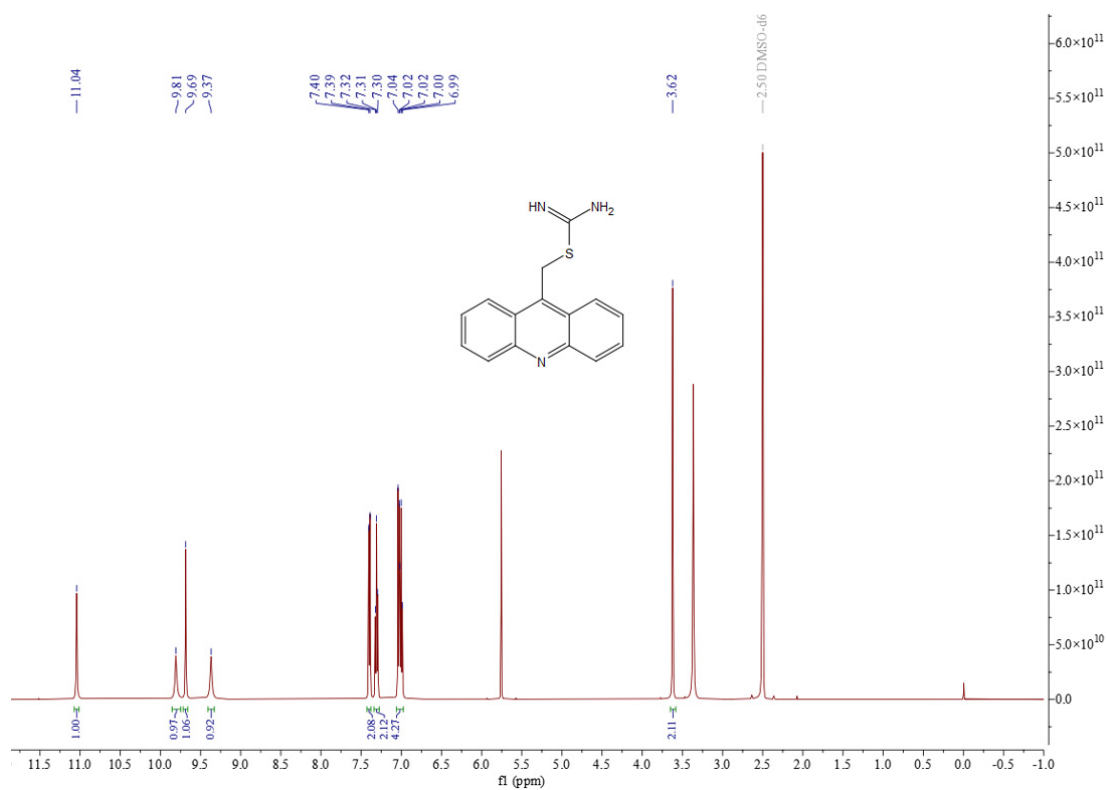

Figure S83 <sup>1</sup>H NMR spectrum of 14q

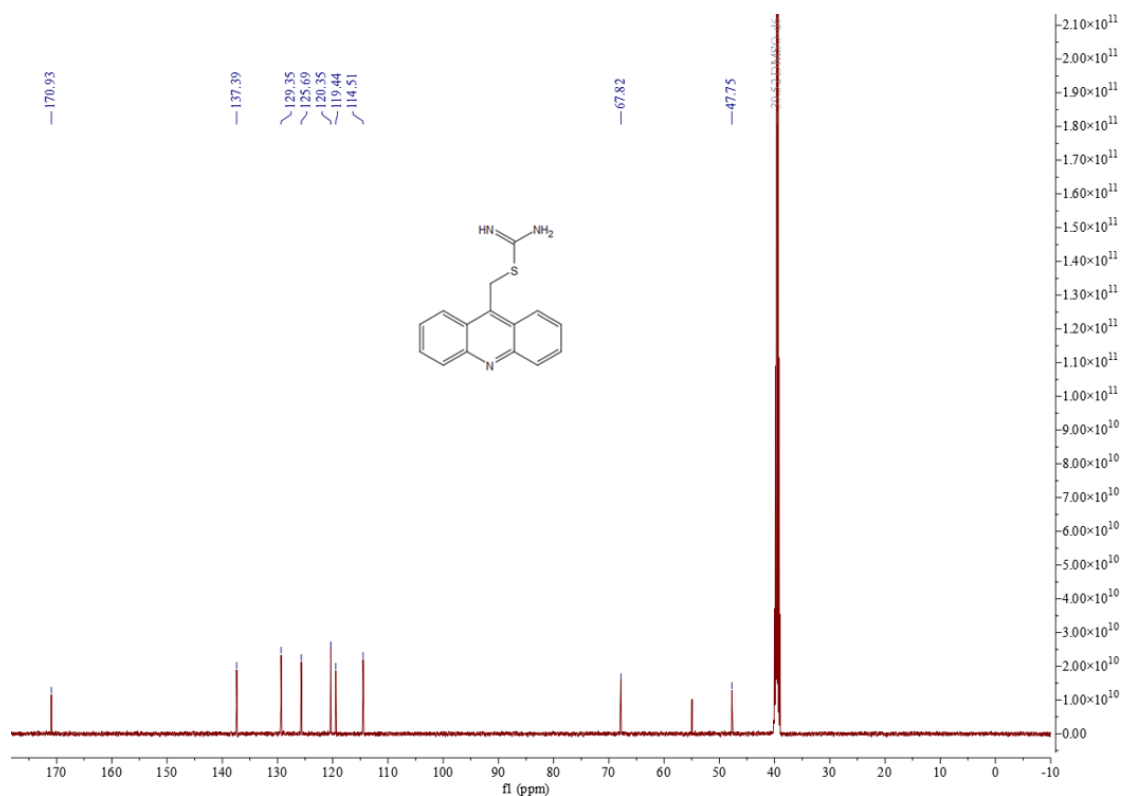

Figure S84 <sup>13</sup>C NMR spectrum of 14q

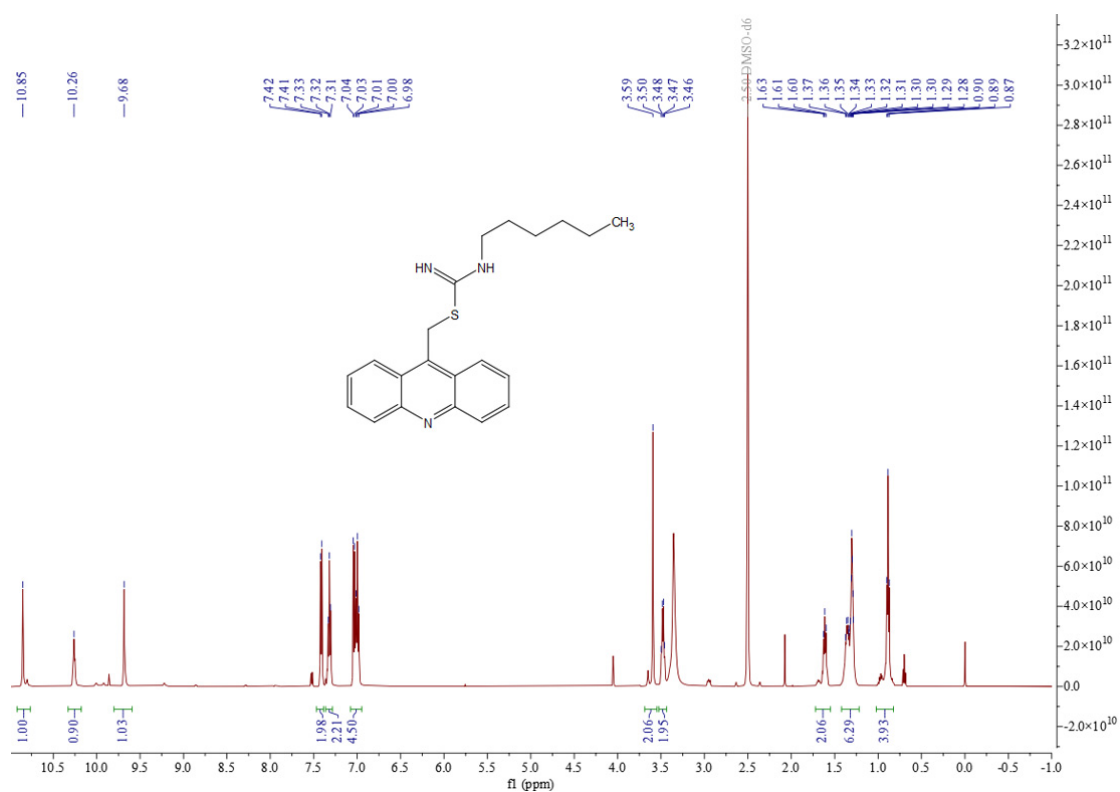

Figure S85 <sup>1</sup>H NMR spectrum of 14r

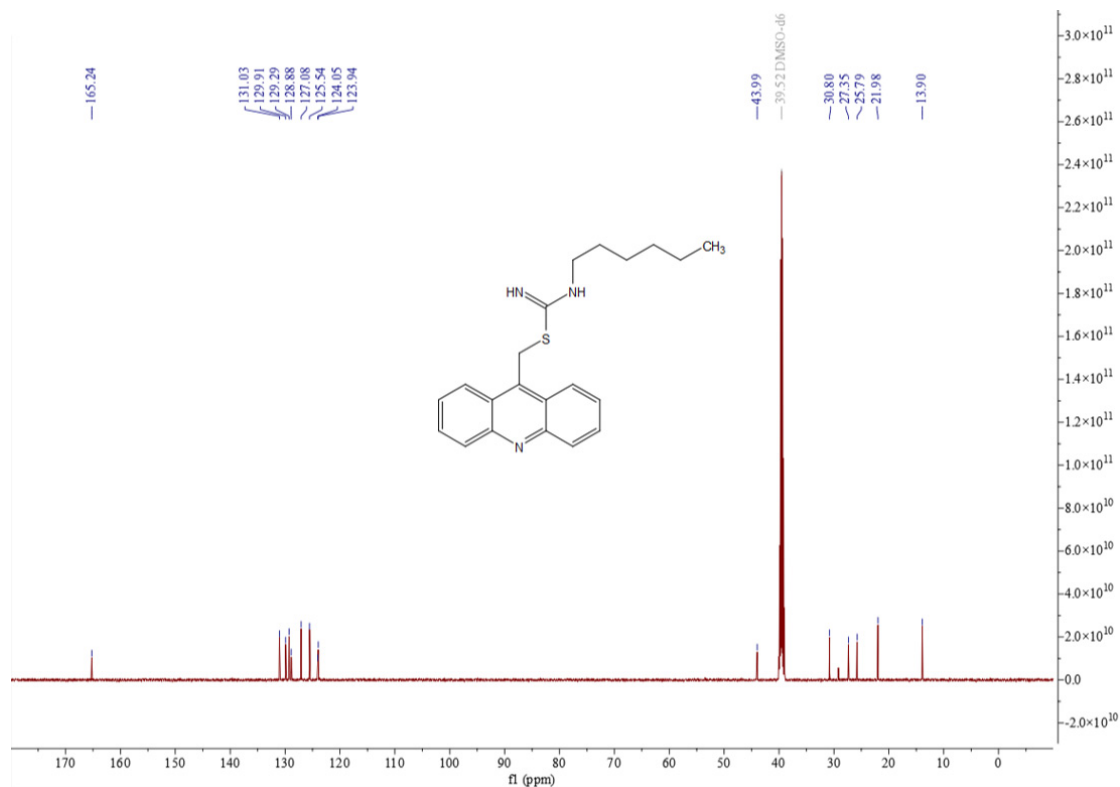

Figure S86 <sup>13</sup>C NMR spectrum of 14r

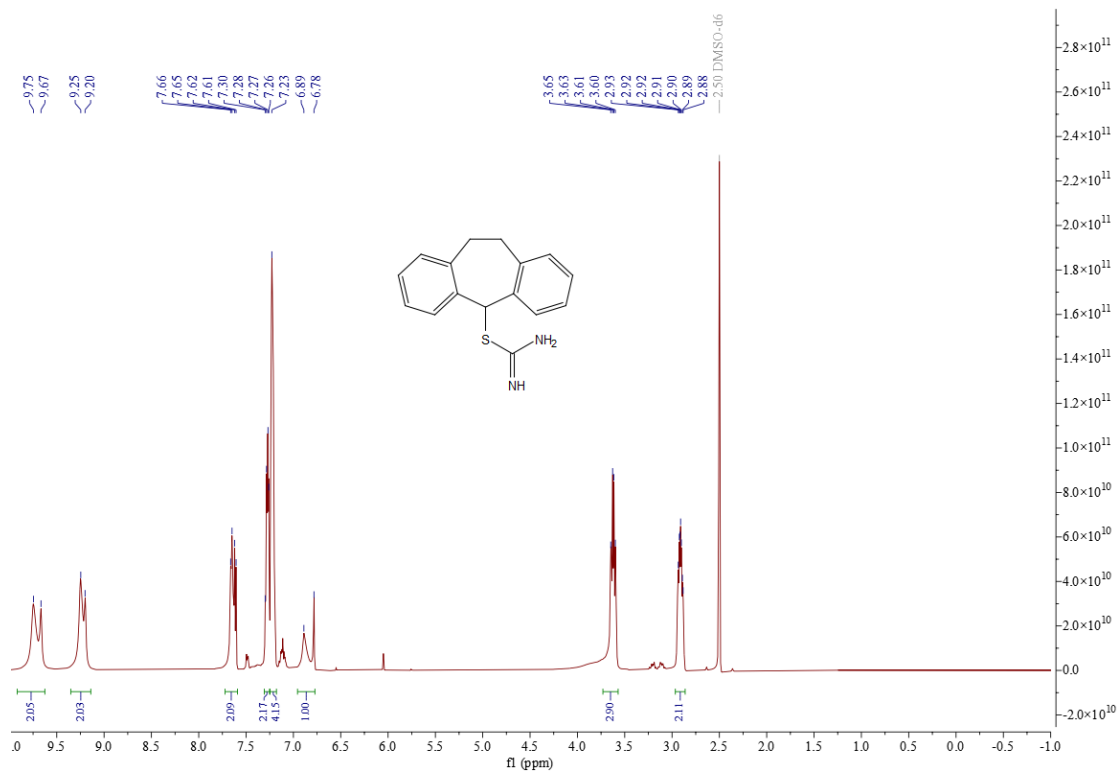

**Figure S87 <sup>1</sup>H NMR spectrum of 14s**

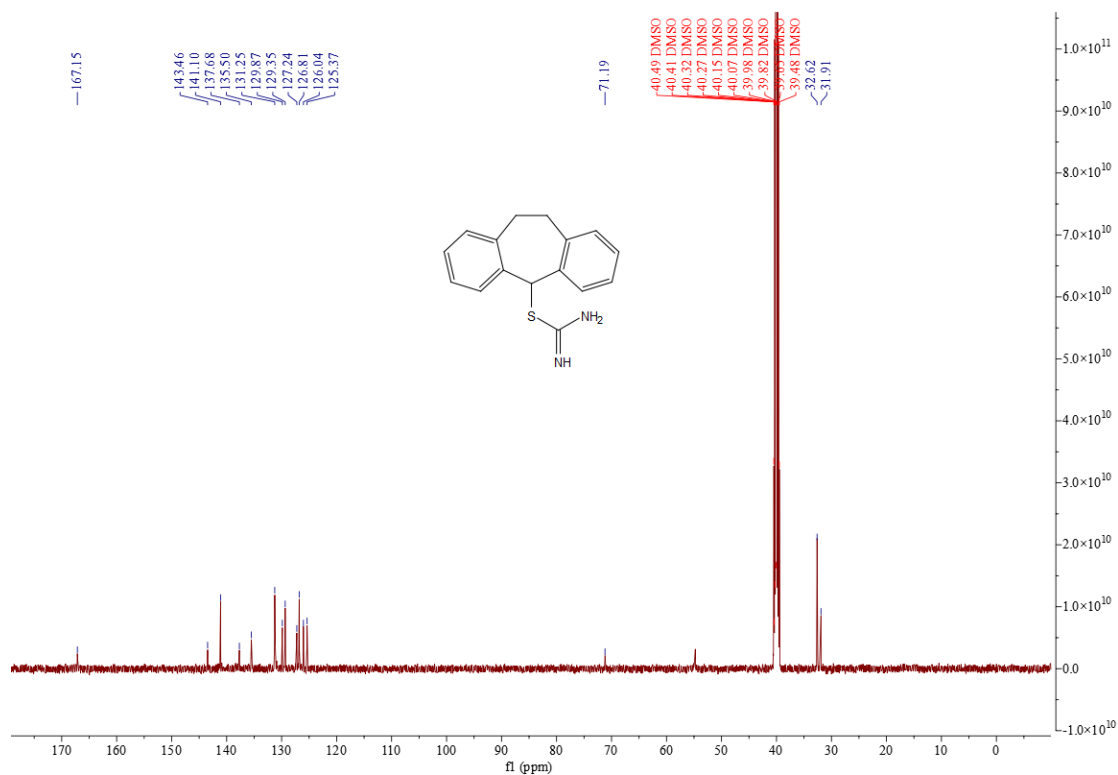

**Figure S88 <sup>13</sup>C NMR spectrum of 14s**

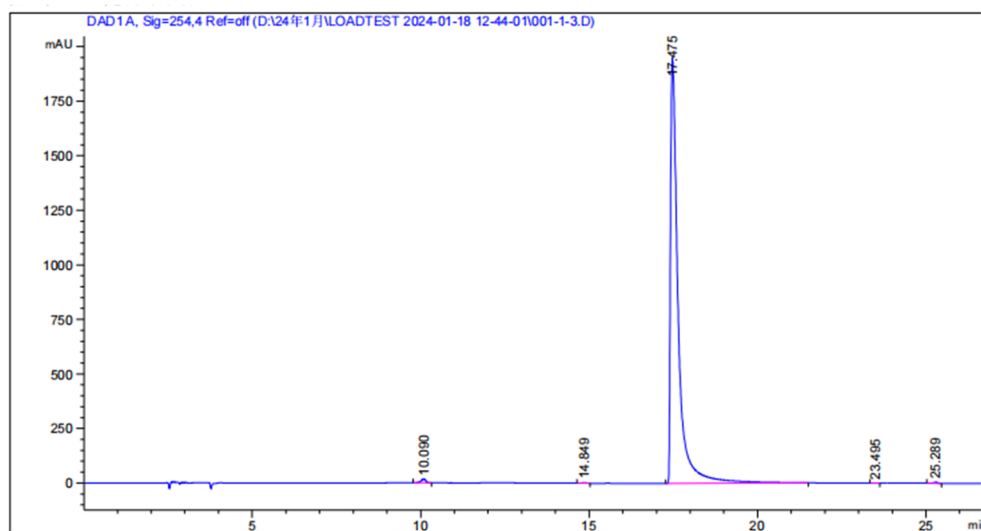

面积百分比报告

排序 : 信号  
 乘积因子 : 1.0000  
 稀释因子 : 1.0000  
 内标使用乘积因子和稀释因子

信号 1: DAD1 A, Sig=254,4 Ref=off

| 峰 # | 保留时间 [min] | 类型 | 峰宽 [min] | 峰面积 [mAU*s] | 峰高 [mAU]   | 峰面积 %   |
|-----|------------|----|----------|-------------|------------|---------|
| 1   | 10.090     | BB | 0.1450   | 171.09261   | 17.98687   | 0.5492  |
| 2   | 14.849     | BB | 0.1239   | 29.31156    | 3.64301    | 0.0941  |
| 3   | 17.475     | BB | 0.2348   | 3.09070e4   | 1951.40308 | 99.2030 |
| 4   | 23.495     | BB | 0.1044   | 9.17282     | 1.29830    | 0.0294  |
| 5   | 25.289     | BB | 0.1325   | 38.73014    | 4.32314    | 0.1243  |

总量 : 3.11553e4 1978.65439

**Figure S89** HPLC spectra of **13e**

4. Dose–response curves of compounds on the cytotoxicity of U87-MG, Hela, MCF-7, and HHL-5 cells

S58

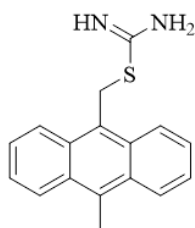

A: U87 B: HHL5 C: Hela D: MCF-7

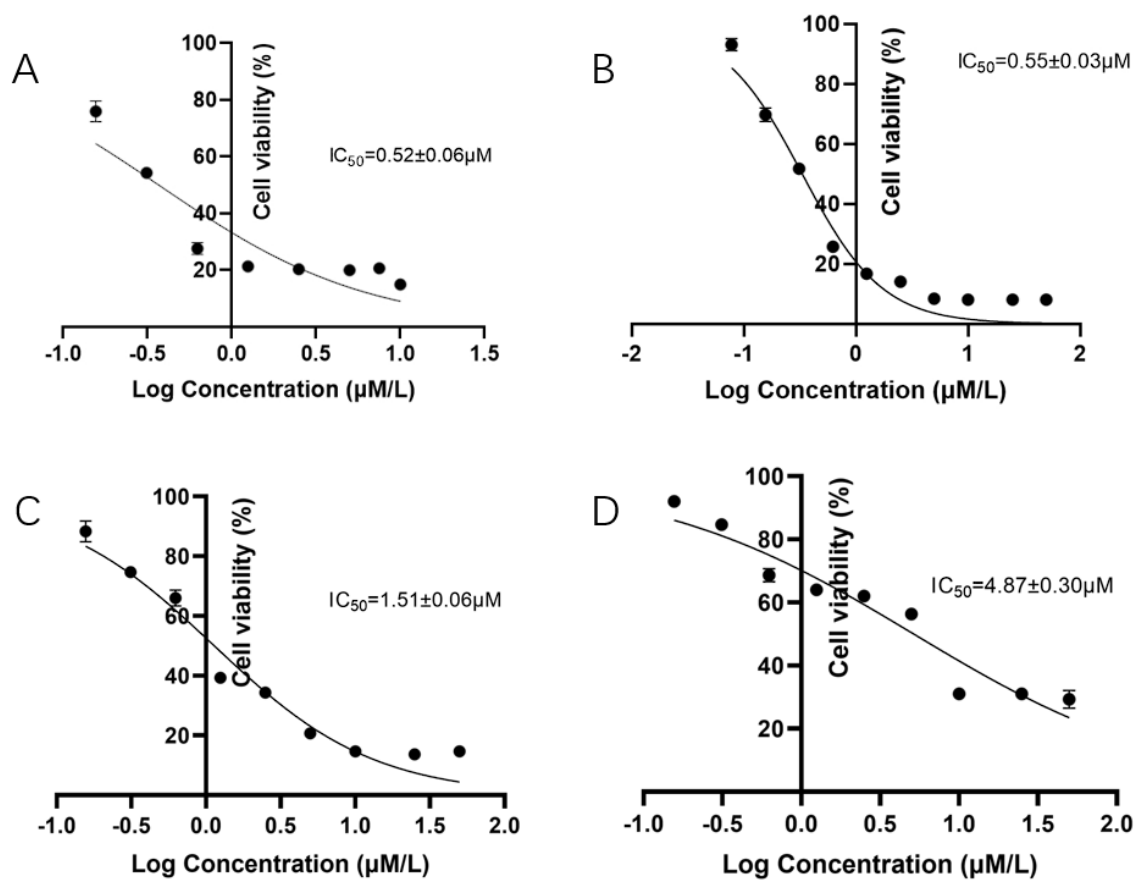

**Figure S89** Dose–response curves of XI-011 on the cytotoxicity of U87-MG, Hela, MCF-7, and HHL-5 cells

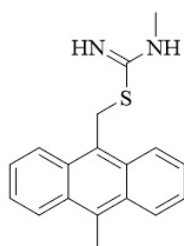

A: U87 B: HHL5 C: HeLa D: MCF-7

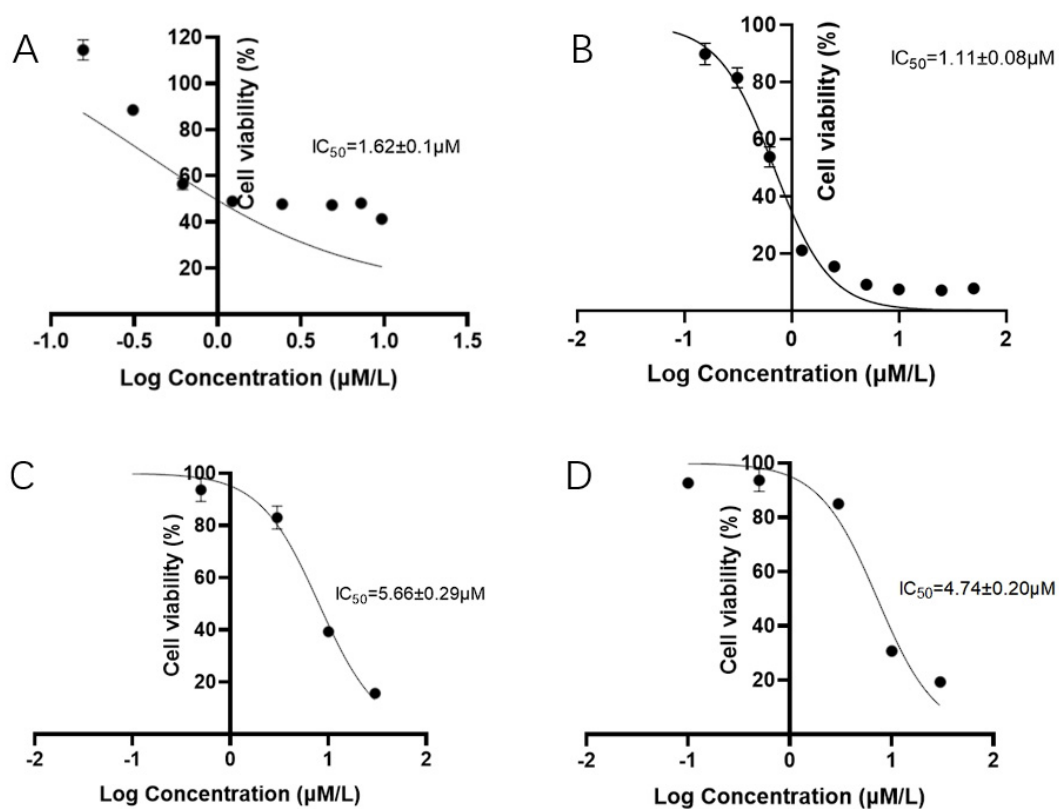

**Figure S90** Dose–response curves of **13d** on the cytotoxicity of U87-MG, HeLa, MCF-7, and HHL-5 cells

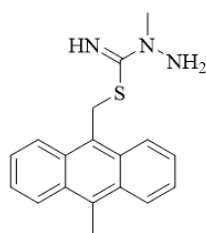

A: U87 B: HHL5 C: HeLa D: MCF-7

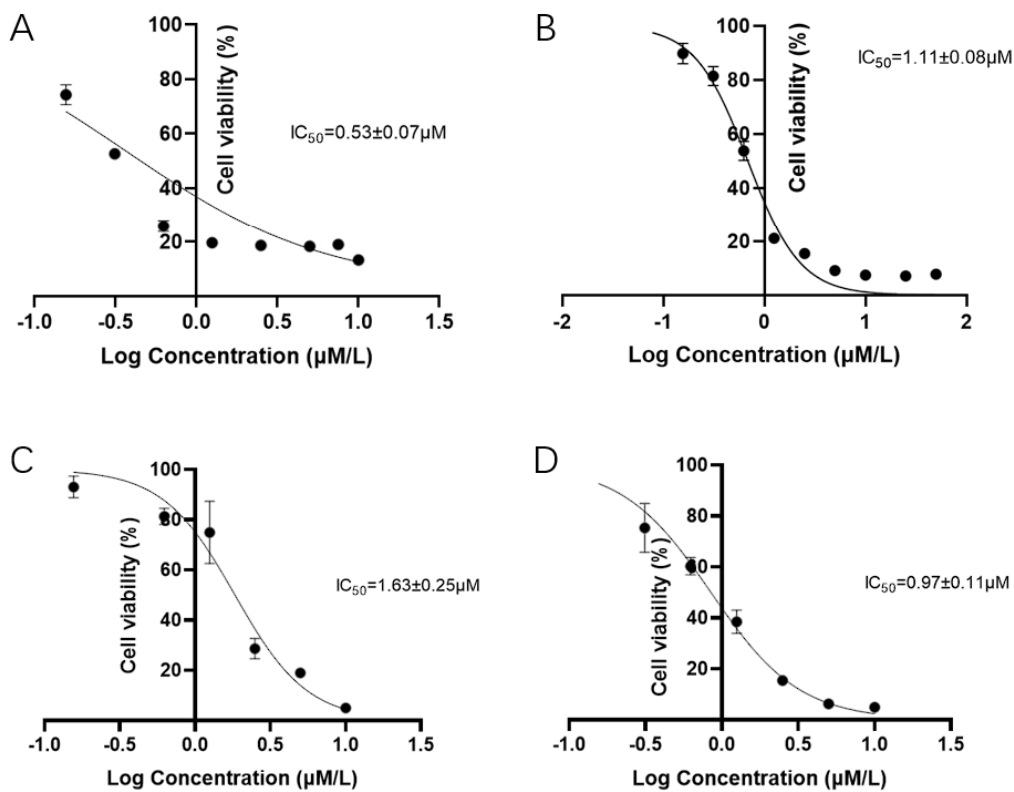

**Figure S91** Dose–response curves of **13e** on the cytotoxicity of U87-MG, HeLa, MCF-7, and HHL-5 cells



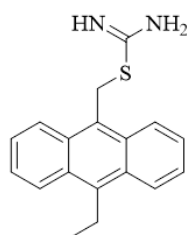

A: U87 B: HHL5 C: HeLa D: MCF-7

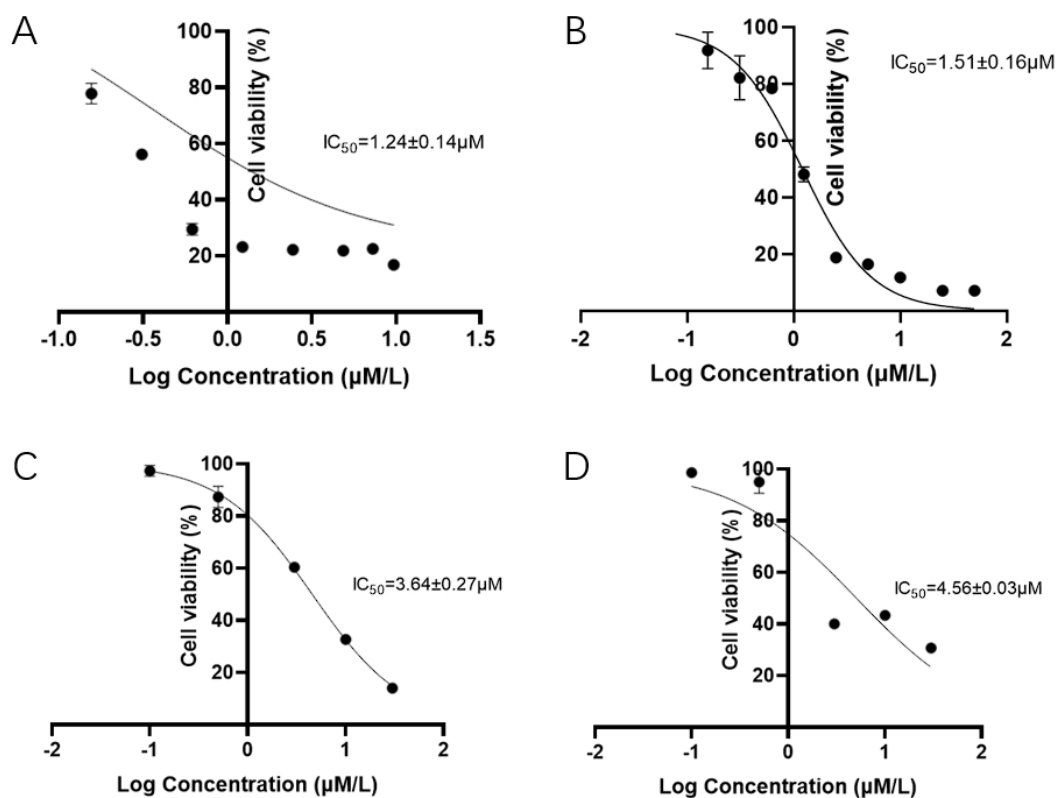

**Figure S92** Dose–response curves of **14a** on the cytotoxicity of U87-MG, HeLa, MCF-7, and HHL-5 cells

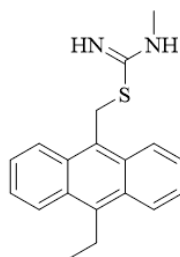

A: U87 B: HHL5 C: HeLa D: MCF-7

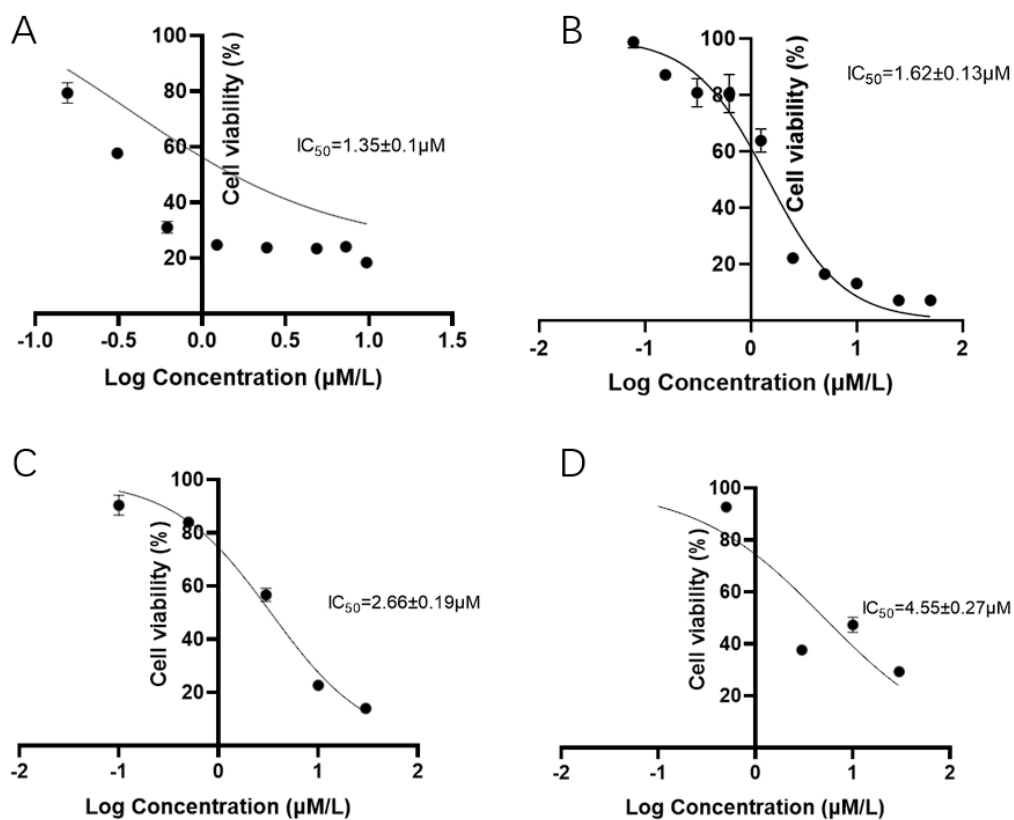

**Figure S93** Dose–response curves of **14b** on the cytotoxicity of U87-MG, HeLa, MCF-7, and HHL-5 cells

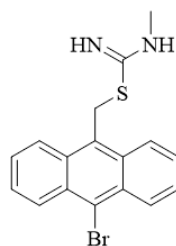

A: U87 B: HHL5 C: HeLa D: MCF-7

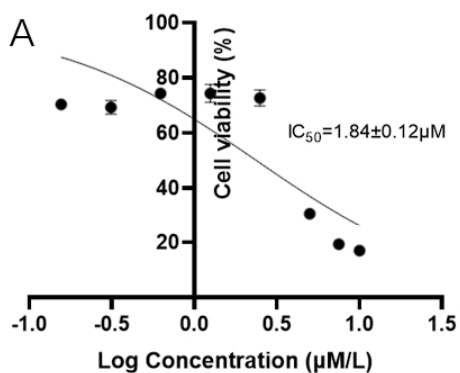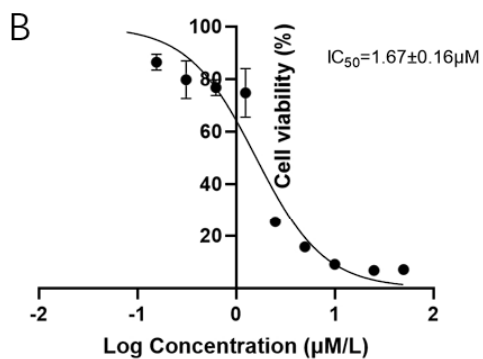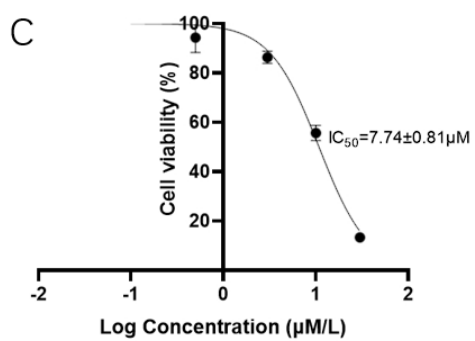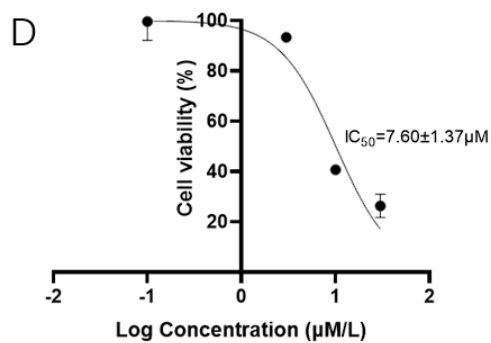

**Figure S94** Dose–response curves of **14n** on the cytotoxicity of U87-MG, HeLa, MCF-7, and HHL-5 cells

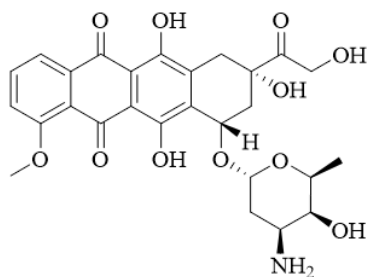

A: U87 B: HHL5 C: Hela D: MCF-7

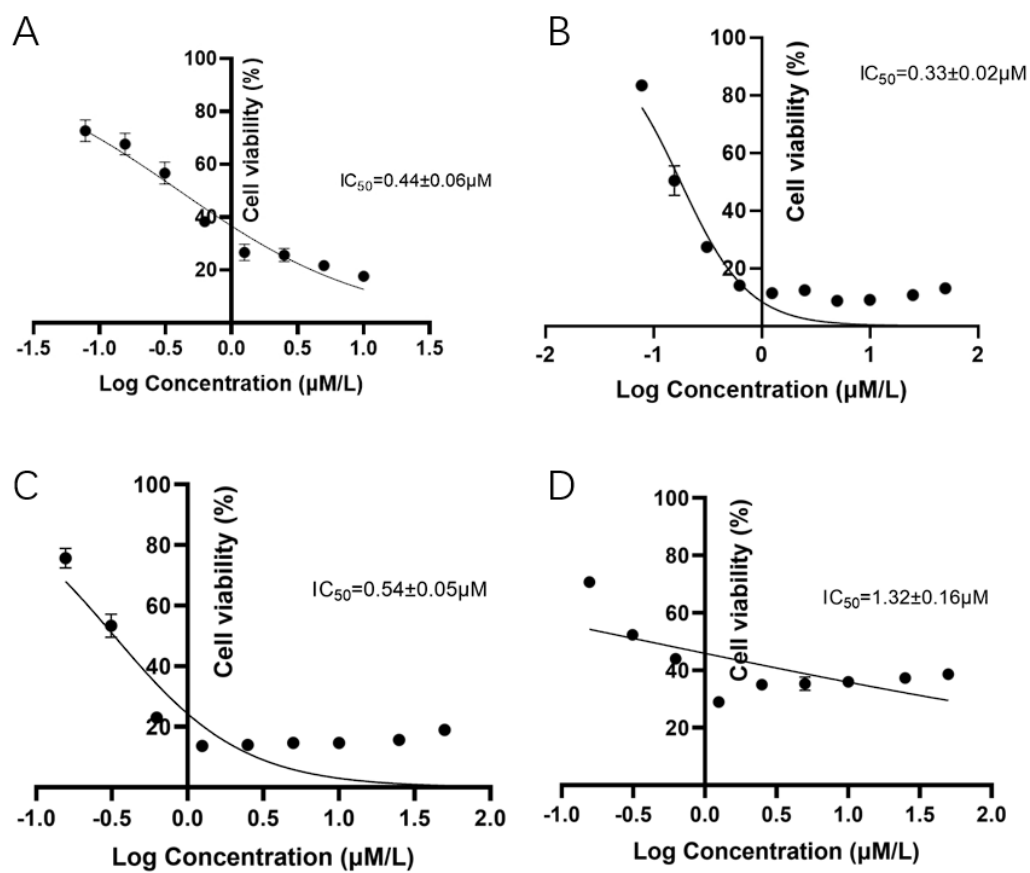

**Figure S94** Dose–response curves of **Dox** on the cytotoxicity of U87-MG, Hela, MCF-7, and HHL-5 cells

## **6. Origin western blots results in U87 cells treatment with 13e**

### **5.1 Origin western blots results of MDM4 in U87 cells treatment with 13e**

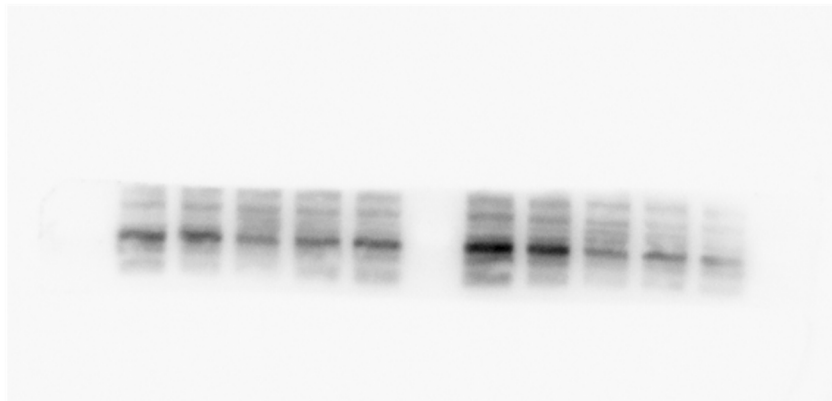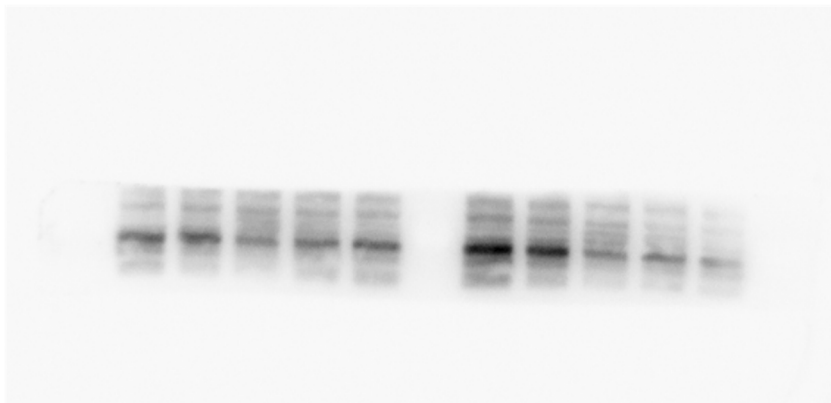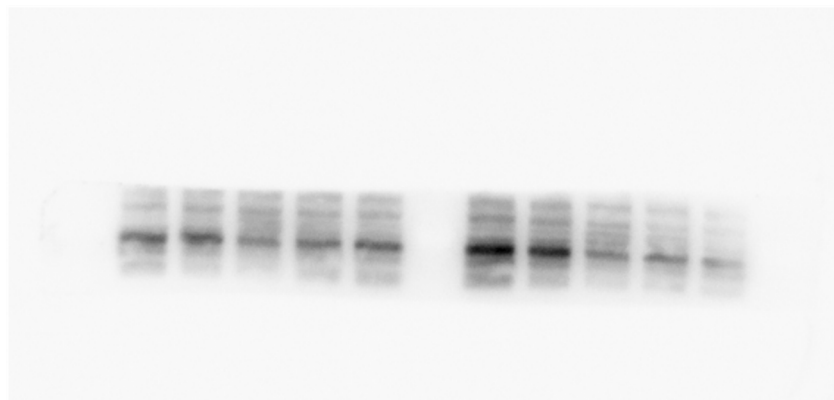

## 5.2 Origin western blots results of p53 in U87 cells treatment with 13e

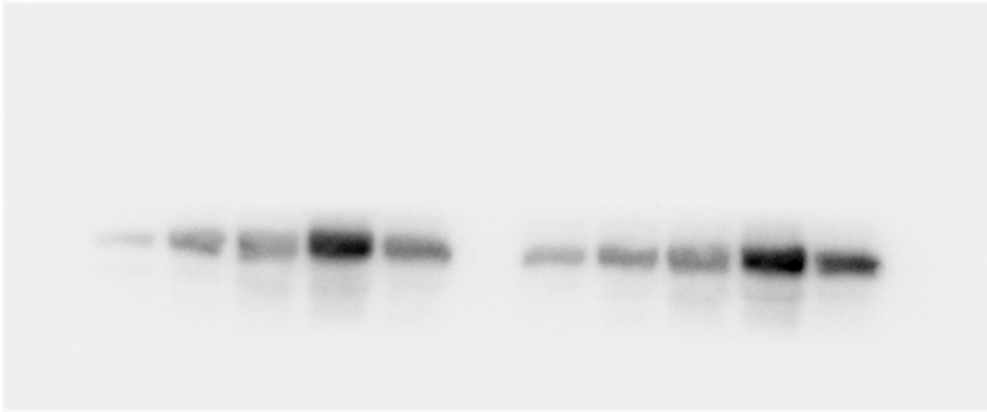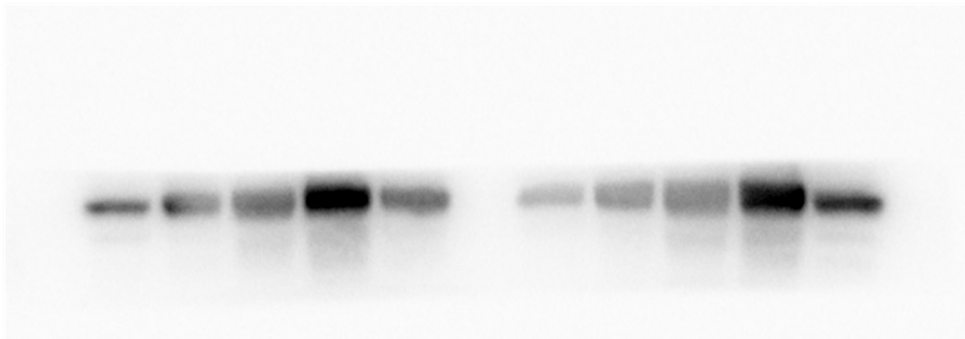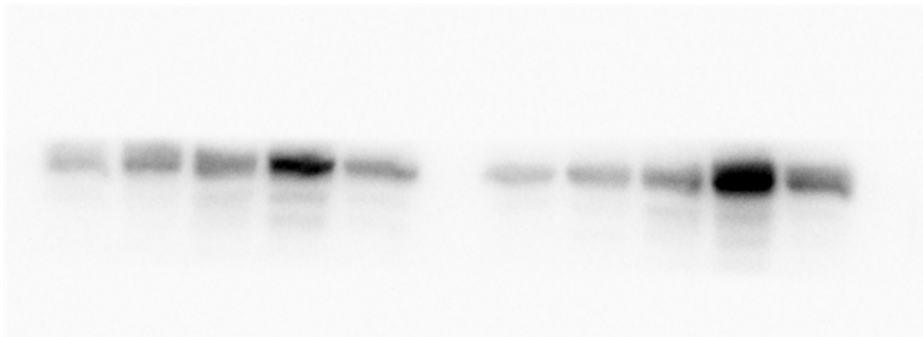

## 5.2 Origin western blots results of GAPDH in U87 cells treatment with 13e

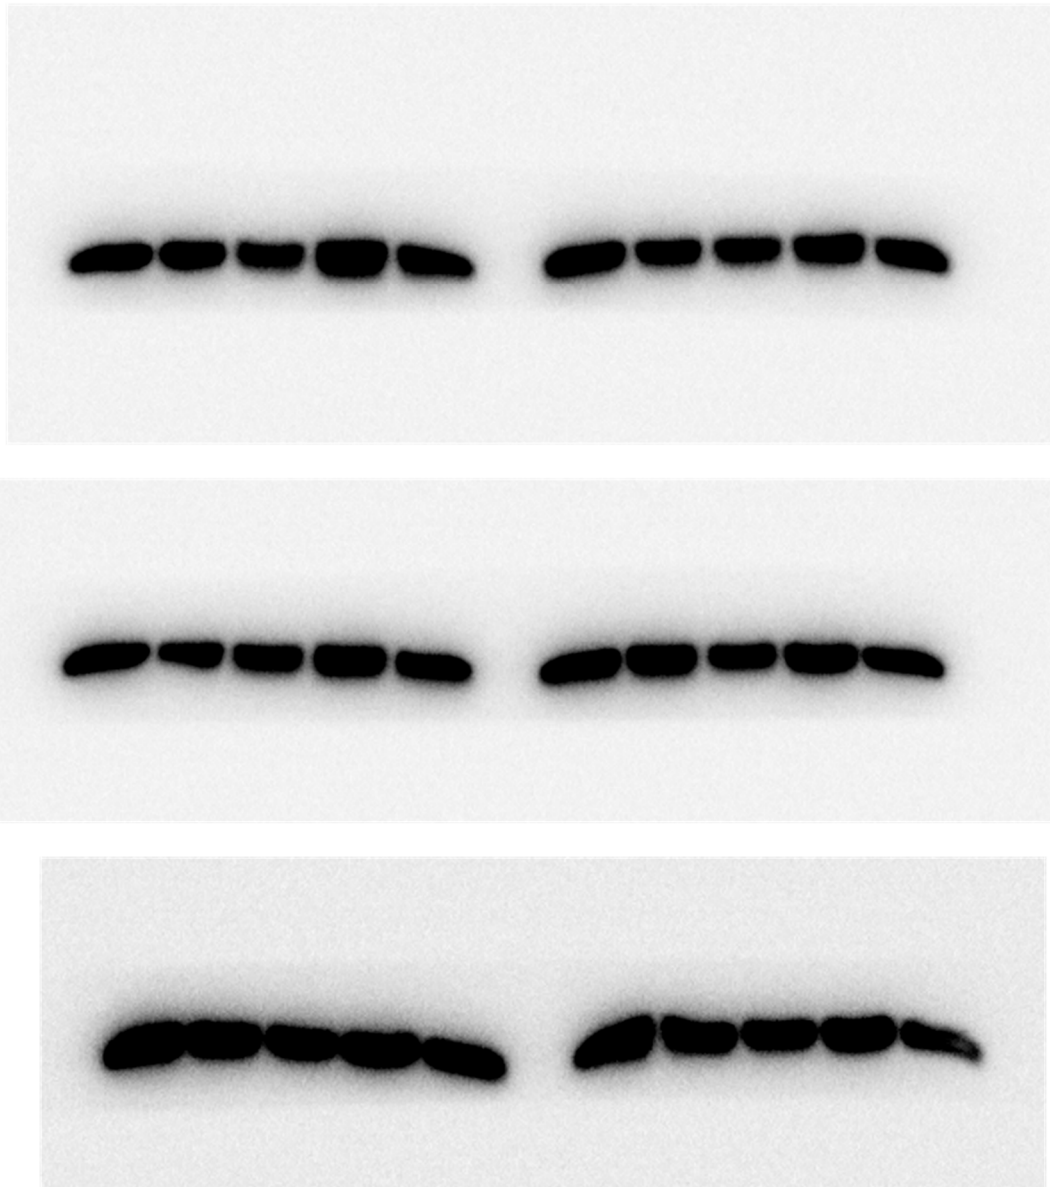

Supplement: s1 [file s1]
